1 **Rbfox1 is required for myofibril development and maintaining fiber-type specific**  
2 **isoform expression in *Drosophila* muscles**

3

4 Elena Nikonova<sup>2\*</sup>, Ketaki Kamble<sup>1\*</sup>, Amartya Mukherjee<sup>1\*</sup>, Christiane Barz<sup>3</sup>, Upendra  
5 Nongthomba<sup>1,#</sup>, Maria L. Spletter<sup>2,#</sup>

6

7 \*These authors contributed equally.

8

9 1. Department of Molecular Reproduction, Development and Genetics (MRDG); Indian  
10 Institute of Science, Bangalore - 560 012, India.

11 2. Biomedical Center, Department of Physiological Chemistry, Ludwig-Maximilians-  
12 Universität München, Großhaderner Str. 9, 82152 Martinsried-Planegg Germany

13 3. Muscle Dynamics Group, Max Planck Institute of Biochemistry, 82152 Martinsried-  
14 Planegg, Germany

15

16 #Corresponding authors:

17 Dr. Upendra Nongthomba, Department of Molecular Reproduction, Development and  
18 Genetics (MRDG), Indian Institute of Science, Bangalore - 560 012, India.

19 E-mail address: [upendra@iisc.ac.in](mailto:upendra@iisc.ac.in), Telephone: +91-80-22933258, Fax: +91-80-23600999.

20

21 Dr. Maria L. Spletter, Biomedical Center, Department of Physiological Chemistry, Ludwig-  
22 Maximilians-Universität München, Großhaderner Str. 9, 82152 Martinsried-Planegg  
23 Germany.

24 E-mail address: [maria.spletter@bmc.med.lmu.de](mailto:maria.spletter@bmc.med.lmu.de), Telephone: +49-89-2180-77086, Fax: +49-  
25 89-2180-77086

26 **Abstract**

27 Protein isoform transitions confer distinct properties on muscle fibers and are regulated  
28 predominantly by differential transcription and alternative splicing. RNA-binding Fox protein  
29 1 (Rbfox1) can affect both transcript levels and splicing, and is known to control skeletal  
30 muscle function. However, the detailed mechanisms by which Rbfox1 contributes to normal  
31 muscle development and physiology remain obscure. In this study, we report that Rbfox1  
32 contributes to the generation of adult muscle diversity in *Drosophila*. Rbfox1 is differentially  
33 expressed in tubular and fibrillar muscle fiber types. RNAi knockdown of Rbfox1 leads to a  
34 loss of flight, climbing and jumping ability, as well as eclosion defects. Myofibers in  
35 knockdown muscle are frequently torn, and sarcomeres are hypercontracted. These defects  
36 arise from mis-regulation of fiber-type specific gene and splice isoform expression, notably  
37 loss of an IFM-specific isoform of Troponin-I that is critical for regulating myosin activity.  
38 We find that Rbfox1 influences mRNA transcript levels through 1) direct binding of 3'-UTRs  
39 of target transcripts as well as 2) through regulation of myogenic transcription factors,  
40 including Mef2, Exd and Salm. Moreover, Rbfox1 modulates splice isoform expression  
41 through 1) direct regulation of target splice events in structural genes and 2) regulation of the  
42 CELF-family RNA-binding protein Bruno1. Our data indicate that cross-regulatory  
43 interactions observed between FOX and CELF family RNA-binding proteins in vertebrates  
44 are conserved between their counterparts, Rbfox1 and Bruno1 in flies. Rbfox1 thus affects  
45 muscle development by regulation of both fiber-type specific gene and gene isoform  
46 expression dynamics of identity genes and structural proteins.

47

48 **Key words:** Rbfox1/A2BP1, muscle hypercontraction, *Drosophila*, Bruno1, flight muscle

49

50 **Running title:** Rbfox1 in muscle development.



## 52 **Introduction**

53 Muscles are an ideal model to understand the strategies involved in the generation of  
54 diversity within a tissue, as they are developmentally patterned to be equipped with distinct  
55 morphologies and to perform diverse functions (Spletter and Schnorrer, 2014). Muscles  
56 develop to accommodate a heterogeneous composition of fiber-types with protein isoform-  
57 specific signatures that impart distinctive functionalities to meet diverse physiological  
58 demands (Armstrong and Phelps, 1984; Bottinelli, 2001; Bottinelli and Reggiani, 2000;  
59 Schiaffino and Reggiani, 2011; Schiaffino et al., 2020). Composite muscle fiber profiles are a  
60 result of coordinated regulation of gene expression (Black and Olson, 1998; Firulli and Olson,  
61 1997; Majesky, 2007), co-integrated with protein isoform transitions facilitated by alternative  
62 splicing (Guo et al., 2010; Kalsotra and Cooper, 2011; Nikonova et al., 2020; Smith et al.,  
63 1989), accompanied by post-translational modifications (Anthony et al., 2002; Michele and  
64 Campbell, 2003; Nayak and Amrute-Nayak, 2020; Wells et al., 2003). The underlying  
65 molecular changes are initially regulated by the intrinsic developmental program (Firulli and  
66 Olson, 1997; Kablar and Rudnicki, 2000), and later modulated by nerve stimulation,  
67 physiological demands and patho-physiological conditions (Hughes et al., 1993; Pette and  
68 Staron, 2001; Pistoni et al., 2010; Schiaffino et al., 2007). The process of protein isoform  
69 expression needs to be tightly regulated to have a functionally relevant outcome (Anthony et  
70 al., 2002; Black and Olson, 1998; Firulli and Olson, 1997; Guo et al., 2010; Kalsotra and  
71 Cooper, 2011; Majesky, 2007; Smith et al., 1989).

72 Protein isoform expression is regulated by a diverse array of RNA binding proteins  
73 (RBPs). RBPs regulate the process of alternative splicing by binding to *cis*-intronic elements  
74 in target RNAs to generate the splicing profile of a given cell type (Fu and Ares, 2014;  
75 Kalsotra and Cooper, 2011). RBPs can also regulate translation level by binding to 3'-UTR  
76 elements and subsequently associating with translation factors, P-granules or components of

77 the nonsense-mediate decay (NMD) pathway (Hentze et al., 2018; Ho et al., 2021; Kishor et  
78 al., 2019). RBPs are thus key mediators of eukaryotic genome information during  
79 development and are essential for establishing, refining and maintaining tissue and fiber-type  
80 specific properties (Grifone et al., 2020; Lunde et al., 2007; Nikonova et al., 2019; Spletter  
81 and Schnorrer, 2014). The salience of this function is illustrated by observations that  
82 alternative splicing and protein isoform expression patterns are disrupted in diseases from  
83 cardiomyopathy to cancer (Bessa et al., 2020; Picchiarelli and Dupuis, 2020; Ravanidis et al.,  
84 2018), and that loss of RBP function leads to severe neuromuscular disorders, such as  
85 myotonic dystrophy, amyotrophic lateral sclerosis, and spinal motor atrophy (López-Martínez  
86 et al., 2020; Nikonova et al., 2019; Picchiarelli and Dupuis, 2020). It is therefore critically  
87 important to understand RBP function in detail.

88 RNA-binding Fox protein 1 (Rbfox1, the first identified member of the FOX family of  
89 RBPs), is an RBP with a single, highly-conserved RNA recognition motif (RRM) domain that  
90 binds to 5'-UGCAUG-3' motifs (Auweter et al., 2006; Jin et al., 2003). Rbfox1 binding to  
91 introns causes context-dependent exon retention or skipping, depending on if it binds  
92 upstream or downstream of an alternative exon (Fukumura et al., 2007; Nakahata and  
93 Kawamoto, 2005), while 3'-UTR binding is reported to modulate mRNA stability (Carreira-  
94 Rosario et al., 2016). Rbfox1 may additionally influence transcription networks by binding  
95 transcriptional regulators (Shukla et al., 2017; Usha and Shashidhara, 2010; Wei et al., 2016).  
96 In vertebrates, Rbfox1 has been shown to either cooperatively or competitively regulate  
97 splicing with other RBPs such as SUP-12, ASD-1, MBNL1, NOVA, PTBP, CELF1/2 and  
98 PSF (Conboy, 2017; Klinck et al., 2014), as well as to be involved in cross-regulatory  
99 interactions with CELF and MBNL family proteins (Gazzara et al., 2017; Sellier et al., 2018).  
100 This context-dependent nature of Rbfox1 function, as well as integration with other splicing  
101 networks, is not yet fully understood.

102 Rbfox1 plays an important role in regulating the development of both neurons and  
103 muscle (Conboy, 2017). It regulates sensory neuron specification in *Drosophila* (Shukla et al.,  
104 2017), and in vertebrates is necessary for proper neuronal migration and axonal growth  
105 (Hamada et al., 2016), is induced by stress (Amir-Zilberstein et al., 2012), and modulates the  
106 splicing of genes involved axonal depolarization (Gehman et al., 2011; Lee et al., 2009). In  
107 vertebrate muscle, Rbfox1 binding sites are enriched around developmentally-regulated,  
108 alternatively spliced exons in heart (Kalsotra et al., 2008) and Rbfox1 mediated splicing is  
109 involved in the regulation of cardiac failure (Gao et al., 2016). Rbfox1 regulates alternative  
110 splicing of structural proteins as well as proteins in the calcium signaling pathway in skeletal  
111 muscle, (Pedrotti et al., 2015), and is necessary for the maintenance of skeletal muscle mass  
112 (Singh et al., 2018). Rbfox1 mutant mice display myofiber and sarcomeric defects and  
113 impaired muscle function (Pedrotti et al., 2015), and Rbfox is downregulated in the mouse  
114 model of Facio-scapulo humoral dystrophy (FSHD) (Pistoni et al., 2010). The exact role of  
115 Rbfox1 in muscle development and physiology is still not well understood, and is moreover  
116 complicated by the presence of other FOX family members in vertebrates, notably Rbfox2  
117 (Begg et al., 2020; Conboy, 2017; Singh et al., 2018), that have similar functions.

118 Invertebrate models, such as *Drosophila*, are particularly useful to investigate the  
119 conserved mechanisms of RBP function in muscle (Nikonova et al., 2019). The *Drosophila*  
120 genome has a single copy of the *Rbfox1* (*A2BPI*) gene (Kuroyanagi, 2009), making it easier  
121 to study Rbfox1 function without the complexities of redundancy. Muscle structure, as well as  
122 the mechanism of acto-myosin contractility, is highly conserved (Dasbiswas et al., 2018;  
123 Lemke and Schnorrer, 2017), and studies of alternative splicing regulation and fiber-type  
124 specific protein isoform function have proven highly informative (Jagla et al., 2017; Jawkar  
125 and Nongthomba, 2020; Plantié et al., 2015). *Drosophila* muscles are of two major types: 1)  
126 the fibrillar indirect flight muscles (IFMs) comprised of the dorsal longitudinal (DLMs) and

127 dorso-ventral muscles (DVMs), and 2) the tubular muscles, which constitute the rest of the fly  
128 muscles. Fibrillar muscles are physiologically similar to vertebrate cardiac muscles (Peckham  
129 et al., 1990; Pringle, 1981; Swank et al., 2006), while tubular muscles resemble those of the  
130 vertebrate skeletal muscles (de la Pompa et al., 1989; Nikonova et al., 2020). *Drosophila*  
131 muscles also have a uniform fiber-type within a muscle fascicle (Bernstein et al., 1993;  
132 Spletter and Schnorrer, 2014), removing the complication of heterogeneous muscle fiber  
133 composition found in mammalian muscles.

134 In the present study, we investigated the role of Rbfox1 in muscle diversity and  
135 function using *Drosophila* adult muscles. We show that Rbfox1's role in muscle development  
136 is conserved, as it is necessary for the development of both fibrillar and tubular fiber-types.  
137 Impairment of Rbfox1 function in the IFMs causes muscle hypercontraction resulting from  
138 the mis-splicing and stoichiometric imbalance of structural proteins. We present evidence that  
139 Rbfox1 regulates fiber-type specific isoform expression on multiple levels: 1) regulating  
140 transcript levels through direct 3'-UTR binding as well as indirectly through regulation of  
141 transcription factors including Extradenticle (Exd), Spalt major (Salm) and Myocyte enhancer  
142 factor 2 (Mef2) and 2) regulating isoform expression through direct intronic binding near  
143 alternative exons, as well as through regulation of and genetic interaction with the CELF-  
144 family splicing factor Bruno1 (Bru1). Notably, Rbfox1, Bruno1 and Salm exhibit level-  
145 dependent, cross-regulatory interactions in IFMs. This indicates conservation of an ancient  
146 regulatory network between FOX and CELF family proteins in muscle, and moreover  
147 suggests a feedback mechanism that integrates RNA-regulation into transcriptional  
148 refinement of fiber-type identity.

149

## 150 **Results**

### 151 **Rbfox1 is differentially expressed between tubular and fibrillar muscles**

152 To evaluate the expression pattern of *Rbfox1* in *Drosophila* muscle, we used the  
153 protein trap *Rbfox1<sup>CC00511</sup>* (*Rbfox1*-GFP) fly line (Kelso et al., 2004) to track GFP-tagged  
154 *Rbfox1* protein expression. We first examined the indirect flight muscles (IFMs), and  
155 confirmed earlier data (Usha and Shashidhara, 2010) showing that *Rbfox1* is expressed on the  
156 wing discs of third instar larvae (L3), in a pattern consistent with the myoblasts (Fig. 1 A).  
157 *Rbfox1* protein is detectable in IFM nuclei at all stages of adult myofiber development: at 24h  
158 APF in IFMs undergoing splitting and myoblast fusion (Fig. 1 B), at 40h APF during  
159 sarcomere assembly (Fig. 1 C), at 58h and 72h as sarcomeres undergo maturation (Fig. 1 D,  
160 E) and in 2-day old adult IFMs (Fig. 1 F). We also detect continual expression of *Rbfox1* in  
161 IFMs at the RNA level based on mRNA-Seq data (Fig. 1 G). Interestingly, we observed a dip  
162 in *Rbfox1* expression levels around 50h APF in the middle of IFM development on both the  
163 protein and mRNA levels.

164 We next examined *Rbfox1* expression in other types of somatic muscle. *Rbfox1*-GFP  
165 can be detected in the nuclei of all muscles examined, including the tubular abdominal  
166 muscles (Abd-M), tergal depressor of the trochanter (TDT or jump muscle), gut and leg  
167 muscles (Fig. 1 I-L). Likewise, *Rbfox1* mRNA is detected in all muscles tested, including  
168 IFM, TDT, legs and abdomen (Fig. 1 H, M, Fig. S1 A, C). *Rbfox1* mRNA is expressed at  
169 significantly higher levels in tubular TDT than in fibrillar IFMs, as revealed by mRNA-Seq  
170 (Fig. 1 H) and RT-PCR (Fig. 1 M, Fig. S1 C), and may display preferential exon use between  
171 these two fiber types (Fig. S1 B). As leg muscle and Abd-M samples cannot be dissected to  
172 the same purity as IFM and TDT, mRNA levels in these samples may not accurately represent  
173 muscle-specific *Rbfox1* expression. Taken together, these data demonstrate that although  
174 *Rbfox1* is expressed in all types of muscle in *Drosophila*, the expression level is regulated  
175 both in a temporal and muscle-type specific manner.

176



## 177 **Rbfox1 function in muscle is necessary for viability and pupal eclosion**

178 To evaluate Rbfox1 function in muscle development, we tested several tools to reduce  
179 Rbfox1 levels. We used the deGradFP system, which was developed to specifically target  
180 GFP fused proteins (Caussinus et al., 2012), to knockdown *Rbfox1*<sup>CC00511</sup> (Rbfox1-GFP). We  
181 also used three RNAi hairpins targeting *Rbfox1*, including *Rbfox1*-RNAi (Usha and  
182 Shashidhara, 2010), *Rbfox1*-IR<sup>27286</sup> and *Rbfox1*-IR<sup>KK110518</sup> (Nikonova et al., 2019) (Fig. S1 A).  
183 Temporal and spatial regulation of these tools allowed us to evaluate Rbfox1 phenotypes  
184 under experimental conditions with different levels of Rbfox1 knockdown.

185 We started by inducing deGradFP using the constitutive muscle driver Mef2-Gal4,  
186 which resulted in early lethality (Fig. 2 A). To restrict knockdown specifically to  
187 development of the adult muscles and avoid lethality, we combined Mef2-Gal4 driven  
188 Rbfox1<sup>CC00511</sup>-deGradFP and *Rbfox1*-RNAi with *tubulin-Gal80<sup>ts</sup>* and performed a  
189 temperature shift from 18 °C to 29 °C at late L3. Temperature-shifted deGradFP flies were  
190 pupal lethal and failed to eclose (Fig. 2 A, C). *Rbfox1*-RNAi was less severe, and around 70%  
191 of pupae were able to eclose (Fig. 2 A). We confirmed *Rbfox1* knockdown by qPCR (Fig. S1  
192 D). Mef2-Gal4 driven knockdown with *Rbfox1*-IR<sup>KK110518</sup> was pupal lethal, and larval lethal  
193 when combined with UAS-Dcr2 or driven with Act5c-Gal4 (Fig. 2 A, B). *Rbfox1*-IR<sup>27286</sup> was  
194 the weakest hairpin, as more than 80% of flies eclosed when crossed to Act5c-Gal4 or Mef2-  
195 Gal4. When combined with UAS-Dcr2, most *Rbfox1*-IR<sup>27286</sup> flies eclosed at 22 °C, but were  
196 pupal lethal at 25 °C and 27 °C (Fig. 2 B). We confirmed the level of knockdown by semi-  
197 quantitative RT-PCR (Fig. S1 E). We thus are able to tune the expression level of Rbfox1 in  
198 muscle and established a knockdown series ordered from strongest to weakest: deGradFP >  
199 *Rbfox1*-IR<sup>KK110518</sup> > *Rbfox1*-RNAi > *Rbfox1*-IR<sup>27286</sup>. We conclude that Rbfox1 function in  
200 muscle is required for viability, as the strongest muscle-specific knockdown conditions

201 resulted in early lethality. Rbfox1 is further required during adult muscle development, as  
202 weaker knockdown efficiencies resulted in pupal lethality, notably due to eclosion defects.

203

#### 204 **Rbfox1 contributes to tubular muscle development and function**

205 To determine if Rbfox1 is required in tubular muscles, as suggested by the eclosion  
206 defect, we investigated tubular muscle structure and function. We first assayed climbing  
207 ability by evaluating how many adult flies were able to climb 5 centimetres (cm) in 3 seconds.  
208 We tested *Rbfox1-IR*<sup>27286</sup> flies driven with Act5c-Gal4 and Mef2-Gal4 at 27 °C, and with  
209 UAS-Dcr2, Mef2-Gal4 at 22 °C, as we could obtain surviving adults from these conditions.  
210 Flies with reduced Rbfox1 levels were poor climbers (Fig. 2 D), indicating impairment in  
211 tubular leg muscle function. We did not observe climbing defects when we performed  
212 knockdown with Act88F-Gal4 (Fig. 2 D), which is largely restricted to the fibrillar flight  
213 muscles. To assess functional defects in tubular TDT muscle, we then assayed jumping ability  
214 by measuring the distance a startled fly can jump. Decreased levels of Rbfox1 severely  
215 impaired jumping ability (Fig. 2 E); while control flies on average jumped a distance of  
216 around 2 cm, knockdown flies jumped under 1 cm. We also saw defective jumping in  
217 Act88F-Gal4 driven Rbfox1 knockdown, and phenotypic severity was dependent on the  
218 strength of knockdown (Fig. 2 E). This may reflect a weak expression of the driver in jump  
219 muscle, or expression at an earlier point in TDT development. Together, these data indicate  
220 that a decrease in Rbfox1 levels results in behaviour defects associated with impaired tubular  
221 muscle function.

222 We next examined tubular muscle structure using confocal microscopy. We observed  
223 severe disruptions in sarcomere and myofibril structure in both TDT and Abd-M depending  
224 on the strength of Rbfox1 knockdown (Fig. 2 F-O). TDT myofibrils were frayed and severely  
225 disorganized after knockdown with all three RNAi hairpins (Fig. 2 F-J). Although nuclei were

226 still organized in the center of the TDT myofibers, the cytoplasmic space between the nuclei  
227 was often invaded by myofibrils in knockdown conditions (Fig. S1 H-J). In severe examples,  
228 TDT fibers were atrophic and severely degraded (Fig. S1 P). The TDT sarcomeres were  
229 significantly shorter in 1d adult flies with Mef2-Gal4 driven *Rbfox1*-IR<sup>27286</sup> ( $2.11 \pm 0.21 \mu\text{m}$   
230 versus  $2.71 \pm 0.19 \mu\text{m}$  in control, p-value < 0.001) and this was enhanced in the presence of  
231 Dcr2 ( $1.76 \pm 0.31 \mu\text{m}$  versus  $2.98 \pm 0.26 \mu\text{m}$  in control, p-value < 0.001). Sarcomeres were  
232 not significantly shorter at 90h APF with the stronger Mef2-Gal4 driven *Rbfox1*-IR<sup>KK110518</sup>  
233 ( $2.43 \pm 0.27 \mu\text{m}$  versus  $2.52 \pm 0.24 \mu\text{m}$  in control, p-value = 0.7413) (Fig. 2 P). Classic  
234 hypercontraction mutants in IFMs display a similar phenotype, where mis-regulated Myosin  
235 activity leads to sarcomere shortening after eclosion (Nongthomba et al., 2003).

236 We observed similar defects in Abd-M sarcomere and myofibril structure after *Rbfox1*  
237 knockdown (Fig. 2 K-O). Knockdown with *Rbfox1*-RNAi during adult muscle development  
238 led to loss of sarcomere architecture (Fig. 2 L). In *Rbfox1*-IR<sup>27286</sup> and *Rbfox1*-IR<sup>KK110518</sup>  
239 knockdown animals, Abd-M myofibers were often torn (Fig. 2 M-O) or degraded (Fig. S1 Q).  
240 Myofibrils were disorganized, at times invading the center of the fiber (Fig. S1 M-O), and  
241 laterally-aligned Z-discs were poorly organized (Fig. 2 M-O). Abd-M sarcomeres in 1d adults  
242 with Dcr2, Mef2-Gal4 driven *Rbfox1*-IR<sup>27286</sup> were significantly shorter than controls ( $2.99 \pm$   
243  $0.64 \mu\text{m}$  versus  $3.70 \pm 0.47 \mu\text{m}$  in control, p-value < 0.001), and were already significantly  
244 shorter at 90h in Mef2-Gal4 driven *Rbfox1*-IR<sup>KK110518</sup> ( $2.71 \pm 0.83 \mu\text{m}$  versus  $3.74 \pm 0.64 \mu\text{m}$   
245 in control, p-value < 0.001) (Fig. 2 Q). Overall, the observed phenotypes in tubular TDT and  
246 Abd-M are consistent between independent RNAi hairpins and phenotypic severity increases  
247 with increasing strength of *Rbfox1* knockdown. Taken together, the defects in eclosion,  
248 climbing, jumping and tubular myofiber morphology indicate a general requirement for  
249 *Rbfox1* in tubular muscle development.

250

## 251 **Knockdown of *Rbfox1* leads to muscle hypercontraction in the IFMs**

252 We next evaluated *Rbfox1* function in fibrillar indirect flight muscle (IFMs). We were able to  
253 obtain surviving adults from pupal-restricted *Rbfox1*-RNAi, and noted these flies were  
254 completely flightless (Fig. 3 A). In agreement with our previous results (Nikonova et al.,  
255 2019), we also found that surviving adults from all *Rbfox1*-IR<sup>27286</sup> crosses, as well as flies  
256 with IFM-restricted, Act88F-Gal4 driven *Rbfox1*-IR<sup>KK110518</sup> had impaired flight ability (Fig. 3  
257 B). The strength of the flight defect increased with the strength of the *Rbfox1* knockdown and  
258 was consistent across all three RNAi hairpins tested.

259 To determine if the impaired flight was the result of defective muscle structure or  
260 function, we examined IFMs using confocal microscopy. Myofibers in thoraxes of 1d old (1d)  
261 adult *Rbfox1*-IR<sup>27286</sup> flies or 90h APF *Rbfox1*-IR<sup>KK110518</sup> flies were frequently torn and  
262 detached (Fig. 3 C-F). Myofibrils in remaining intact DLM myofibers were frayed and wavy  
263 (Fig. 3 C'-E'). Sarcomere length was significantly shorter in 1d adult flies with both *Mef2* >  
264 *Rbfox1*-IR<sup>27286</sup> ( $2.90 \pm 0.24 \mu\text{m}$  versus  $3.34 \pm 0.20 \mu\text{m}$  in control, p-value < 0.001) and with  
265 UAS-Dcr2, *Mef2*-Gal4 enhanced knockdown ( $2.98 \pm 0.33 \mu\text{m}$  versus  $3.43 \pm 0.16 \mu\text{m}$  in  
266 control, p-value < 0.001) (Fig. 3 G, Fig. S2 A). Myofibril width in *Mef2* > *Rbfox1*-IR<sup>27286</sup>  
267 IFMs was significantly thicker than control ( $1.58 \pm 0.25 \mu\text{m}$  versus  $1.18 \pm 0.11 \mu\text{m}$  in control,  
268 p-value < 0.001) (Fig. 3 H, Fig. S2B). Myofibril width was actually thinner with UAS-Dcr2,  
269 *Mef2*-Gal4 enhanced knockdown in 1d adults ( $0.92 \pm 0.22 \mu\text{m}$  versus  $1.14 \pm 0.12 \mu\text{m}$  in  
270 control, p-value < 0.001), possibly reflecting the increased severity of myofibril fraying and  
271 loss. At 90h APF, sarcomeres of *Rbfox1*-IR<sup>27286</sup> and *Rbfox1*-IR<sup>KK110518</sup> flies were not  
272 significantly shorter than the control (Fig. 3 G, Fig. S2 A), but myofibrils tended to be thicker  
273 (Fig. S2 B). Myofibrils in Act88F-Gal4 mediated knockdown only showed mild defects (Fig.  
274 3 G, H, Fig. S2 C, D) despite adult flies being flight impaired.

275 We further confirmed the IFM defects with *Rbfox1*-RNAi and *Rbfox1*<sup>CC00511</sup>-  
276 deGradFP. When we assessed DLMs of the few *Rbfox1*<sup>CC00511</sup>-deGradFP escapers, we saw  
277 tearing or detachment of muscle fibers (Fig. S2 F-H) and defective patterning of the DLM  
278 myofibrils, including actin accumulations and sarcomeric defects (Fig. S2 I, J). We visualized  
279 DLM fibers from *Rbfox1*-RNAi adult flies under polarized light and also observed tearing and  
280 loss of muscle fibers (Fig. 3 I, J, L). Sarcomere cytoarchitecture was severely disrupted,  
281 accompanied by the appearance of actin accumulations at the Z-discs, also known as Zebra  
282 bodies (Fig. 3 I', J'). We were unable to attempt a rescue of these defects because *Rbfox1*  
283 over-expression with Mef2-Gal4 was lethal. Over-expression of *Rbfox1* from 40h APF using  
284 the IFM-specific UH3-Gal4 (Singh et al., 2014) resulted in an IFM phenotype similar to the  
285 knockdown, including torn myofibers (Fig. S2 E) and thin, frayed or torn myofibrils with  
286 short sarcomeres (Fig. S2 E'). The consistency in phenotype between all three RNAi hairpins  
287 and *Rbfox1*<sup>CC00511</sup>-deGradFP, as well as the increased phenotypic severity with stronger  
288 knockdown, indicate that Rbfox1 is required for IFM development. Moreover, the decrease in  
289 sarcomere length with a corresponding increase in myofibril width in 1d old adults suggests  
290 that loss of Rbfox1 results in a hypercontraction phenotype. Interestingly, both *Rbfox1*  
291 knockdown and Rbfox1 over-expression produce similar hypercontraction defects.

292 Previously, hypercontraction has been characterised as the damage caused by mis-  
293 regulated acto-myosin interactions, which can result from many factors including mutations in  
294 structural proteins, mechanical stress, stoichiometric imbalance and mis-expression of  
295 structural protein isoforms (Firdaus et al., 2015; Nongthomba et al., 2003; Nongthomba et al.,  
296 2004; Nongthomba et al., 2007). These mis-regulated acto-myosin interactions can be  
297 suppressed by a myosin heavy chain allele (*Mhc*<sup>P401S</sup>) that minimizes the force produced by  
298 acto-myosin interactions (Nongthomba et al., 2003). Including the *Mhc*<sup>P401S</sup> allele in the  
299 *Rbfox1*-RNAi knockdown background restored the structure of IFM myofibers (Fig. 3 K, L)

300 and sarcomeric cytoarchitecture (Fig. 3K'), confirming that the *Rbfox1* knockdown phenotype  
301 indeed resulted from muscle hypercontraction. Complicated genetic recombination prevented  
302 us from using the *Mhc*<sup>P401S</sup> allele to additionally confirm the hypercontraction phenotype  
303 observed in *Rbfox1* over-expression IFMs.

304

### 305 **Bioinformatic identification of muscle genes with *Rbfox1* binding motifs**

306 FOX1, the vertebrate homologue of *Rbfox1*, has previously been shown to regulate splicing  
307 and its binding site is over-represented in introns flanking muscle specific exons in  
308 vertebrates (Brudno et al., 2001). *Drosophila* *Rbfox1* recognizes the same (U)GCAUG motif  
309 in RNA (Carreira-Rosario et al., 2016); therefore, we performed a bioinformatic search to  
310 identify putative RNA targets of *Rbfox1* involved in muscle development. We identified  
311 3,312 genes with intronic *Rbfox1* binding motifs, as well as 683 and 1,184 genes with *Rbfox1*  
312 binding motifs in their 5'-UTR or 3'-UTR regions, respectively (Fig. S3 A, Table S1). The  
313 presence of intronic motifs identifies possible alternative splicing targets, while UTR motifs  
314 may indicate direct regulation of mRNA stability, trafficking or translation. When classified  
315 based on their molecular function gene ontology (GO) annotation, many of these genes have  
316 binding or catalytic activity, notably including DNA, RNA and actin-binding, and a portion  
317 are structural molecules (Fig. S3 B). When we look in previously annotated gene lists  
318 (Spletter et al., 2018), around 20% of all RNA-binding proteins, 40% of transcription factors  
319 and 60% of sarcomere proteins contain *Rbfox1* binding motifs in their introns or UTR regions  
320 (Fig. S3 C). Overall, about 30% of genes that have reported RNAi phenotypes in muscle  
321 (Schnorrer et al., 2010) and nearly 25% of genes regulated in a fibrillar-specific manner  
322 (Spletter et al., 2015) also contain canonical *Rbfox1* binding motifs. These genes influencing  
323 muscle development are enriched for Biological Process GO terms such as “regulation of  
324 transcription, DNA-templated”, “regulation of RNA metabolic process”, “actin cytoskeleton

325 organization” and “sarcomere organization” (Fig. S3 D). We also see enrichment for terms  
326 like “signal transduction”, “synapse organization” and “axon guidance,” suggesting that  
327 characterized roles for *Rbfox1* in neuronal development (Gehman et al., 2011) may also affect  
328 the neuro-muscular junction. This strongly suggests that genes important for muscle  
329 development are likely targets of *Rbfox1* regulation.

330 We then selected candidate *Rbfox1* target genes to verify based on their direct or  
331 indirect involvement in muscle contraction, which could explain the sarcomere defects and  
332 mis-regulated acto-myosin interactions in the *Rbfox1* knockdown condition. We found that  
333 the characterized myogenic transcription factors *extradenticle (exd)* and *Myocyte enhancer*  
334 *factor 2 (Mef2)* contain 3 and 7 *Rbfox1* motifs, respectively, both in introns and 3'-UTR  
335 regions (Fig. S3 F, G). The RNA-binding protein Bruno1 (*Bru1*, also called *arrest*), which has  
336 previously been shown to regulate fibrillar-specific alternative splicing (Oas et al., 2014;  
337 Spletter et al., 2015), contains 42 intronic and 2 5'-UTR *Rbfox1* binding motifs (Fig. S3 H).  
338 We also noted that putative *Rbfox1* targets include proteins with structural molecule activity  
339 such as Troponin-I (TnI), which is encoded by the gene *wings up A (wupA)*. TnI is the  
340 inhibitory subunit of the Troponin complex and has an *Rbfox1* binding site downstream of  
341 exon 6b1 and another in the 3'-UTR (Fig. S3 E). The TnI isoform containing exon 6b1 and  
342 exon 3 is reported to be specific to the IFMs and its loss was previously shown to result in  
343 hypercontraction (Barbas et al., 1993; Nongthomba et al., 2004). We next proceeded to  
344 experimentally validate these candidate genes.

345

### 346 ***Rbfox1* regulates expression of structural proteins**

347 To confirm if *Rbfox1* regulates target structural proteins including TnI, we checked the  
348 expression of TnI in *Rbfox1*-RNAi IFMs. TnI protein levels were significantly upregulated in  
349 the IFMs with *Rbfox1* knockdown as assayed by Western Blot (Fig. 4 A, B). Although not

350 significant, *wupA* mRNA levels tend towards upregulation in *Rbfox1*-RNAi IFMs and TDT as  
351 assayed by RT-qPCR (Fig. S4 A). Overexpression of *Rbfox1* significantly reduced the levels  
352 of TnI protein detected by Western Blot in IFMs (Fig. 4 D, E). *wupA* mRNA levels were not  
353 significantly changed with *Rbfox1* overexpression, but tended towards upregulation (Fig. S4  
354 A). As a control which lacks the *Rbfox1* binding site (Table S1), we assessed expression of  
355 the flight muscle specific actin (*Act88F*). Although *Act88F* levels in IFMs tended toward  
356 upregulation, we did not observe statistically significant changes in either *Act88F* protein  
357 (Fig. 4A, C) or mRNA (Fig. S4 B, C, D) levels. Surprisingly, overexpression of *Rbfox1*  
358 significantly decreased the expression level of *Act88F* protein (Fig. 4 D, F) and mRNA (Fig.  
359 S4 B). In addition, *Rbfox1* knockdown in TDT resulted in significantly decreased levels of  
360 *Act88F* mRNA (Fig. S4 C, D). Thus, *Rbfox1* negatively regulates expression of structural  
361 proteins TnI and *Act88F* in IFMs, and positively regulates *Act88F* mRNA levels in TDT.

362 To determine whether *Rbfox1* directly binds *wupA* (TnI) and *Act88F* mRNAs, we  
363 performed RNA immunoprecipitation (RIP) to pull down target RNAs bound to *Rbfox1*. We  
364 used the *Rbfox1*<sup>CC00511</sup> (*Rbfox1*-GFP) fly line and confirmed via Western blot that anti-GFP  
365 antibodies could selectively immunoprecipitate *Rbfox1*-GFP (Fig. 4 G). We then amplified  
366 RNA bound to *Rbfox1* by RT-PCR with gene-specific primers (Table S2). *Act88F*, which  
367 lacks *Rbfox1* binding sites and thus served as the negative control, could not be detected after  
368 RIP (Fig. 4 H). By contrast, *wupA* (TnI) mRNA was enriched in the RIP with anti-GFP  
369 antibodies, but not in the IgG isotype control (Fig. 4 H'). This likely reflects *Rbfox1* binding  
370 to the motif in the 3'-UTR of *wupA*, as the PCR primers amplify the C-terminal region of the  
371 fully-spliced mRNA transcript. Thus, *Rbfox1* binds directly to *wupA* mRNA to regulate its  
372 expression.

373 While *Rbfox1* binding sites in introns are typically associated with regulation of  
374 alternative splicing (Conboy, 2017), a recent study showed that *Rbfox1* binds to the UTR



375 region of *Pumilio* mRNA and represses its translation in *Drosophila* ovaries (Carreira-Rosario  
376 et al., 2016). To check whether Rbfox1 regulates some target mRNAs such as *wupA* (TnI)  
377 post-transcriptionally in IFMs, we looked for interacting partners of Rbfox1. We performed  
378 co-immunoprecipitation from *Rbfox1<sup>CC00511</sup>* (Rbfox1-GFP) thoraxes followed by mass  
379 spectrometry to identify protein interactors (Fig. S4 E-G). We found that Rbfox1 interacted  
380 with the cellular translation machinery including the eukaryotic translation initiation factor  
381 eIF4-A and Rent-1 (a regulator of nonsense mediated decay) (Fig. S4 G). These findings  
382 suggest that Rbfox1 may regulate translation or direct target mRNAs to nonsense mediated  
383 decay through 3'-UTR binding.

384

### 385 **Mis-regulation of TnI contributes to hypercontraction in Rbfox1 knockdown IFMs**

386 We wondered if the hypercontraction phenotype observed after Rbfox1 knockdown  
387 and overexpression could be caused by mis-regulation of TnI, thus we performed genetic  
388 interaction studies with TnI alleles. It was previously reported that mutations in the TnI  
389 encoding *wupA* gene cause hypercontraction in the IFMs. A mutation in the splice site  
390 preceding exon 6b1 leads to an IFM-specific null mutant *wupA<sup>hdp-3</sup>* (Barbas et al., 1993),  
391 which shows a hypercontraction phenotype in the heterozygous condition (Nongthomba et al.,  
392 2004). Another mutant *wupA<sup>fliH</sup>* has a mutation in the Mef2 binding site located in an  
393 upstream response element (URE) and results in hypercontracted IFMs with reduced levels of  
394 TnI (Firdaus et al., 2015). Since *Rbfox1* knockdown increases TnI levels (Fig. 4 A, B), we  
395 knocked down *Rbfox1* in each of the *wupA<sup>fliH</sup>* and *wupA<sup>hdp-3</sup>* mutant backgrounds to see if TnI  
396 levels were restored and hypercontraction was rescued. As *wupA<sup>fliH</sup>* is a recessive mutation,  
397 hemizygous males were used. *Rbfox1*-RNAi in the *wupA<sup>fliH</sup>* background did not rescue muscle  
398 hypercontraction (Fig. 4 I, J, M), and *TnI* levels did not change significantly (Fig. 4 N).  
399 However, *Rbfox1*-RNAi in *wupA<sup>hdp-3</sup>* heterozygous mutant female flies showed partially

400 rescued the IFM hypercontraction phenotype and significantly reduced myofiber loss (Fig. 4  
401 K, L, M). We confirmed that *wupA<sup>fliH</sup>* heterozygous mutants have 36-40% of *wupA* mRNA  
402 expression compared to *Canton-S* controls, as reported previously (Nongthomba et al., 2004).  
403 We also observed that mRNA levels of specifically the *wupA-6b1* transcript were restored  
404 when *Rbfox1* was knocked down in *wupA<sup>hdp-3</sup>* mutants (Fig. 4 O). Thus, *Rbfox1* knockdown  
405 rescued hypercontraction in *wupA<sup>hdp-3</sup>* but not in *wupA<sup>fliH</sup>* mutants, suggesting that in addition  
406 to direct 3'-UTR binding, *Rbfox1* may influence muscle-specific splicing of *wupA* (TnI).  
407 These results demonstrate that *Rbfox1* regulation of TnI expression contributes to the muscle  
408 hypercontraction phenotype.

409

#### 410 **Rbfox1 regulates splicing factor Bruno1 levels across muscle fiber-types**

411 The mammalian *Rbfox1* ortholog FOX1 not only performs tissue specific splicing of target  
412 mRNAs during muscle development (Nakahata and Kawamoto, 2005), but is also subject to  
413 complex, cross-regulatory interactions with CELF family RNA-binding proteins (Nikonova et  
414 al., 2019). One of the top hits in our bioinformatic analysis with 44 *Rbfox1* binding motifs  
415 was Bruno1 (Bru1) (Fig. 5 A, Fig. S3 H), a CELF1/2 homologue in *Drosophila*. Bru1 has  
416 previously been shown to be necessary and sufficient for IFM-specific alternative splicing of  
417 structural protein genes including *wupA* (TnI) (Oas et al., 2014; Spletter et al., 2015). This led  
418 us to investigate if *Rbfox1* might regulate Bru1 in *Drosophila*.

419 We first evaluated Bru1 expression in *Rbfox1* knockdown muscle at the protein level  
420 using a rabbit polyclonal antibody generated against the divergent domain between RRM2  
421 and RRM3 that should recognize all Bru1 isoforms (Fig. 5 A). In immunostainings of  
422 wildtype (*w<sup>1118</sup>*) adult IFMs, Bru1 is strongly expressed and localized to the nucleus (Fig. 5  
423 B). In IFMs from 1d old adult flies with Mef2-Gal4 driven *Rbfox1-IR<sup>27286</sup>* or in 90 h APF  
424 *Rbfox1-IR<sup>KK110518</sup>* IFMs, we observed reduced Bru1 staining (Fig. 5 C, K). Bru1 staining is

425 absent in a CRISPR mutant *bru1*<sup>M2</sup> that removes the divergent domain, demonstrating  
426 antibody specificity (Fig. 5 A, D, G, J, K). We were able to detect extremely low levels of  
427 mostly cytoplasmic Bru1 in wildtype TDT, and this staining was lost after Rbfox1  
428 knockdown and undetectable in *bru1*<sup>M2</sup> mutant TDT (Fig. 5 E-G, K). There was no Bru1  
429 signal detectable above background in any Abd-M samples (Fig. 5 H-J, K). Thus, Rbfox1  
430 knockdown leads to a reduction of Bru1 protein levels in IFMs and TDT.

431 We next assessed Bru1 protein levels using Western blot. In IFMs dissected from  
432 wildtype flies, we consistently observed a band at 64 kDa and a second at 88 kDa (Fig. 5 L),  
433 presumably corresponding to the Bru1-PA and Bru1-PB protein isoforms produced from the  
434 *bru1-RA* and *bru1-RB* mRNA transcripts, respectively (Fig. 5 A). TDT predominantly  
435 expresses Bru1-PB, while weak expression of Bru1-PA is detected in Abd (Fig. 5 L). Bru1-  
436 PB was significantly reduced in IFMs and TDT from *Rbfox1-IR*<sup>KK110518</sup> flies, while the Bru1-  
437 PA isoform was largely unaffected (Fig. 5 L, M). At the mRNA level, semi-quantitative RT-  
438 PCR using primers targeting a region common to both isoforms revealed a decrease in *bru1*  
439 levels in both IFMs and TDT (Fig. 5 N, O). Levels of specifically the *bru1-RB* transcript were  
440 also reduced in both IFMs and TDT (Fig. 5 N, O). We performed RIP to determine if Rbfox1  
441 regulation of *bru1* mRNA is direct and indeed could detect *bru1* RNA bound to Rbfox1-GFP,  
442 but we are unable to resolve the specific transcript or distinguish between mature mRNA or  
443 partially spliced pre-mRNA in the bound fraction (Fig. S4 H). We also tested a GFP reporter  
444 built with the promoter region upstream of *bru1-RA*, but observed no change in GFP  
445 expression in *Rbfox1-RNAi* IFMs (Fig. S4 I-J). This is either due to differential regulation of  
446 the *bru1-RA* and *bru1-RB* isoforms, or more likely due to regulation of *bru1* RNA processing  
447 rather than transcription. We conclude that Rbfox1 regulates levels of Bru1 in both fibrillar  
448 IFMs and tubular TDT, and preferentially targets the *bru1-RB* isoform.

449

## 450 **Rbfox1 and Bru1 cross-regulatory interactions are expression level dependent**

451 In vertebrates, members of the FOX and CELF families of RNA-binding proteins  
452 display complex cross-regulatory interactions, and we were curious if these interactions are  
453 evolutionarily conserved in flies. First, Rbfox1 has been shown to auto-regulate its own  
454 expression (Damianov and Black, 2010), and indeed we find 35 Rbfox1 binding motifs in  
455 Rbfox1 introns (Figure S5 A). Although strong knockdown with *Rbfox1*-IR<sup>KK110518</sup> and Dcr2  
456 enhanced *Rbfox1*-IR<sup>27286</sup> significantly decreases levels of *Rbfox1* mRNA, a weaker  
457 knockdown with *Rbfox1*-IR<sup>27286</sup> tends towards increased *Rbfox1* levels (Fig. S1 E), suggesting  
458 de-repression of a negative feedback loop. Second, our data with a strong *Rbfox1*-IR<sup>KK110518</sup>  
459 knockdown indicate that Rbfox1 can positively regulate Bru1 protein levels (Fig. 5).  
460 However, in mRNA-Seq data from Spletter et al., (2018), we observed that *Rbfox1* and *bru1*  
461 have opposite temporal mRNA expression profiles across IFM development, suggesting that  
462 Bru1 levels are high when Rbfox1 levels are low (Fig. S5 B). To evaluate if Rbfox1  
463 expression levels might alter the valence of the regulatory interaction with Bru1, we took  
464 advantage of our RNAi knockdown series. Indeed, weaker knockdown conditions with  
465 *Rbfox1*-IR<sup>27286</sup> as well as *Rbfox1*-RNAi resulted in increased levels of *bru1* mRNA as well as  
466 the *bru1*-RB transcript in IFMs (Fig. S5 C, D). Correspondingly, we see a trend towards  
467 increased protein-level expression of Bru1-PA in *Rbfox1*-IR<sup>27286</sup> IFMs, although levels of  
468 both Bru1-PA and Bru1-PB do not change significantly (Fig. S5 E, F). Mef2-Gal4 driven  
469 Rbfox1 overexpression, accomplished by a temperature shift to avoid early lethality, is  
470 sufficient to decrease *bru1* mRNA levels in IFMs (Fig. S5 C), supporting that Rbfox1 can  
471 indeed negatively regulate Bru1 levels. This indicates that in IFMs, the expression level of  
472 Rbfox1 is tightly regulated and determines if Rbfox1 negatively or positively influences Bru1  
473 expression. This regulation is likely fiber-type specific, as *bru1* mRNA levels in *Rbfox1*-  
474 IR<sup>27286</sup> TDT are decreased (Fig. S5 D) and protein levels of both Bru1-PA and Bru1-PB tend

475 to increase in *Rbfox1*-IR<sup>27286</sup> TDT and Abd (Fig. S5 E, F). Similar fiber-type and level-  
476 dependent regulation were also observed for *exd* and *salm* mRNAs, as discussed below.

477 We next evaluated if Bru1 might regulate *Rbfox1*. *Rbfox1* mRNA levels are  
478 significantly downregulated in mRNA-Seq data from 72h APF pupae and 1d adults (Spletter  
479 et al., 2015) when *bru1* is knocked down in IFMs using RNAi (Fig. S5 G), suggesting that  
480 Bru1 positively regulates *Rbfox1* expression. However, there is no significant effect on  
481 *Rbfox1* mRNA levels in IFMs or TDT from *bru1*<sup>M2</sup> or *bru1*<sup>M3</sup> mutants (Fig. S5 G, I, J),  
482 suggesting this regulation depends on how much Bru1 protein is actually present in the  
483 muscle. We see a similar effect when Bru1 is overexpressed: early and strong overexpression  
484 in IFMs with the Mef2 driver significantly decreases *Rbfox1* mRNA levels (Fig. S5 H), but  
485 overexpression from 34h APF with UH3-Gal4 (IFM) does not (Fig. S5 I). Overexpression of  
486 Bru1 in TDT with Act79B-Gal4 also tends to reduce *Rbfox1* levels, although this was not  
487 statistically significant (Fig. S5 J), suggesting that Bru1 can also negatively regulate *Rbfox1*  
488 mRNA levels. We conclude that Bru1 can regulate *Rbfox1* levels in *Drosophila* muscle, and  
489 likely in a level-dependent manner.

490

#### 491 ***Rbfox1* and Bru1 genetically interact selectively during IFM development**

492 Having established that *Rbfox1* and Bru1 regulate each other's expression, we next  
493 explored if they might cooperatively regulate muscle development. *bru1*-IR is reported to  
494 result in short sarcomeres and hypercontraction (Oas et al., 2014; Spletter et al., 2015), a  
495 phenotype very similar to what we characterized in *Rbfox1* knockdown (Fig. 3). We verified  
496 that the Bru1 phenotype is IFM-specific in *bru1*<sup>M2</sup> mutants (Fig. 6) and *bru1*-IR flies (Fig.  
497 S6). We observed loss of myofibers (Fig. 6 B, Fig. S6 C) as well as short, thick sarcomeres in  
498 the IFMs (Fig. 6 F, Q, R, Fig. S6 G), but no phenotype in either TDT or Abd-M (Fig. 6J, N, S,  
499 T, Fig. S6 K, O). By contrast, *Rbfox1* knockdown affects tubular as well as fibrillar muscles

500 (Fig. 6 C, G, K, O; Fig. S6 B, F, J, N). To test if overexpression of Bru1 can also induce  
501 hypercontraction like we observe with overexpression of Rbfox1 (Fig. S2 E), we drove UAS-  
502 Bru1 using Mhc-Gal4 (which expresses from 40h APF onwards). Indeed, overexpression of  
503 Bru1 leads to an IFM hypercontraction phenotype including myofiber loss (Fig. S6 R) and  
504 torn myofibrils with short sarcomeres (Fig. S6 R'). This phenotype could be partially rescued  
505 by the *Mhc*<sup>P401S</sup> allele of myosin heavy chain (Fig. S6 S, S'), confirming that myofiber  
506 detachment is indeed due to hypercontraction. Thus, loss as well as gain of both Bru1 and  
507 Rbfox1 in IFM result in similar phenotypes, including hypercontraction.

508 This led us to test what happens to muscles lacking both Rbfox1 and Bru1.  
509 Knockdown with *Rbfox1-IR*<sup>27286</sup> in the *bru1*<sup>M2</sup> background reveals a strong genetic  
510 interaction. IFM myofibers were still present but severely disorganized and displayed an  
511 unusual banded actin pattern (Fig. 6 D). Myofibril and sarcomere structure were completely  
512 compromised and F-actin formed into disarrayed clumps, as well as spine and star-like  
513 structures (Fig. 6 H). We obtained an identical IFM phenotype in double knockdown (*bru-IR*,  
514 *Rbfox1-RNAi*) flies with Mef2-Gal4 expression restricted to adult IFM development using  
515 *Tubulin-Gal80<sup>ts</sup>* and a temperature shift at the late third instar larval stage (Fig. S6 D, H). This  
516 genetic interaction is restricted to IFMs, as the phenotype in TDT and Abd-M was not  
517 enhanced and appeared consistent with the phenotype observed in *Rbfox1-IR*<sup>27286</sup> (compare  
518 Fig. 6 K, O to L, P) or *Rbfox1-RNAi* (compare Fig. S6 J, N to L, P) alone. TDT myofibrils  
519 were disorganized and frayed with short sarcomeres (Fig. 6 L, S; Fig. S6 L), while Abd-M  
520 myofibrils were discontinuous and sarcomere structure was irregular (Fig. 6 P, T; Fig. S6 P).  
521 This result indicates that Rbfox1 and Bru1 genetically interact in fibrillar IFM, but not in  
522 tubular TDT and Abd-M where primarily Rbfox1 seems to function.

523

524 **Rbfox1 and Bruno1 co-regulate alternative splice events in IFMs**

525 Many developmentally-regulated, alternatively spliced exons in vertebrate muscle have  
526 binding sites for both FOX and CELF family RNA-binding proteins, and in heart notably  
527 appear to be antagonistically co-regulated by CELF2 and RBFOX2 (Bland et al., 2010;  
528 Gazzara et al., 2017). Thus, we next checked if *Rbfox1* and *Bru1* co-regulate alternative  
529 splicing in *Drosophila* muscle. We performed RT-PCR for select alternative splice events in  
530 structural proteins known to have fibrillar and tubular specific isoforms, including *TnI*  
531 (*wupA*), *Zasp52*, *Mhc*, *Sls* and *Strn-Mlck*. *TnI* has IFM- and TDT-specific protein isoforms  
532 marked by the presence or absence of exon-4 (based on the most recent Flybase annotation,  
533 formerly exon 3) (Fig. S6 Q) (Barbas et al., 1993; Beall and Fyrberg, 1991), and this splice  
534 event is regulated by *Bru1* (Oas et al., 2014; Spletter et al., 2015). Loss of *bru1* but not  
535 *Rbfox1* in IFMs caused a complete switch to the tubular event promoting *wupA-Ex4* skipping  
536 (Fig. 6 U). Overexpression of *Bru1* with Act79B-Gal4 in TDT was sufficient to switch to the  
537 IFM event and restore splicing into exon-4 (Fig. 6 U). RT-PCR selective for *wupA-Ex4*  
538 revealed an overall decreased expression in *Rbfox1* knockdown IFMs and TDT, and complete  
539 loss in *bru1*<sup>M2</sup> mutant muscle (Fig. S6 T). These results suggest that *wupA-Ex4* splicing is  
540 largely dependent on *Bru1*, and changes to *wupA* splicing in *Rbfox1* knockdown are likely  
541 indirect.

542 Another structural protein with fibrillar and tubular specific isoforms known to be  
543 regulated by *Bru1* is *Zasp52* (Spletter et al., 2015). *Zasp52* exon-14 is preferentially included  
544 in TDT, shortened in IFMs and skipped in Abd-M (Fig. 6 U). In IFMs, knockdown of *Rbfox1*  
545 and loss of *Bru1* results in a shift towards exon-14 skipping. In TDT, knockdown of *Rbfox1*  
546 also results in a shift towards exon skipping, while loss of *Bru1* has little effect.  
547 Overexpression of *Bru1* in TDT is sufficient to shift splicing to the “short exon 14” isoform of  
548 *Zasp52*. Neither *Rbfox1* knockdown nor loss of *Bru1* alters *Zasp52* splicing in Abd. This  
549 result indicates that *Bru1* promotes use of the alternative 3’ splice site leading to a “short exon

550 14” *Zasp52* isoform in both TDT and IFMs. In TDT but not in IFMs or Abd, *Rbfox1*  
551 promotes inclusion of full-length exon 14, independent of *Bru1*.

552 Myosin Heavy Chain (*Mhc*) has three different alternative C-terminal exons that are  
553 differentially spliced in a temporal and muscle-type specific manner (Clyne et al., 2003; Kao  
554 et al., 2019; Orfanos and Sparrow, 2013). The IFMs in adult flies preferentially use the first  
555 termination site encoded by exon 35 (Fig. 6 U). In *Rbfox1* knockdown and *bru1<sup>M2</sup>* mutant  
556 IFMs, there is a shift towards use of the third termination site in exon 37, and this shift is  
557 more accentuated in *Rbfox1-IR<sup>27286</sup>*, *bru1<sup>M2</sup>* IFMs (Fig. 6 U), suggesting that both *Rbfox1* and  
558 *Bru1* control this event. Use of all three terminal exons is detected in TDT, although exon 37  
559 is preferential. *Rbfox1-IR<sup>KK110501</sup>* TDT shows a shift towards almost exclusive use of exon 37  
560 (Fig. 6 U). There is little or no effect on *Mhc* splicing in TDT from *bru1<sup>M2</sup>* mutants or with  
561 *Bru1* overexpression. Exon 37 is preferentially used in Abd, and loss of *Rbfox1* and *Bru1* has  
562 little effect on *Mhc* splicing (Fig. 6 U). This suggests that both *Rbfox1* and *Bru1* control *Mhc*  
563 C-terminal splicing in IFM, but predominantly *Rbfox1* directs *Mhc* splicing in TDT.

564 We also tested two additional fiber-type specific splice events in *Strn-Mlck* and *Sls*.  
565 The *Strn-Mlck* Isoform R protein, produced from a transcript containing an early termination  
566 in exon 25, is specifically expressed in IFMs (Spletter et al., 2015), although by RT-PCR we  
567 could amplify the *Strn-Mlck-RR* mRNA in all muscle types (Fig. S6 U). This event is  
568 dependent on *Bru1* and independent of *Rbfox1* in IFM, TDT and Abd (Fig. S6 U). *Sls* exon  
569 10 was previously shown to be included in tubular muscle but skipped in IFMs in a *Bru1*-  
570 dependent manner (Oas et al., 2014). We confirmed that the *sls* isoform skipping exon 10 is  
571 absent in *bru1<sup>M2</sup>* mutant IFMs, TDT and Abd-M, and *Bru1* overexpression is sufficient to  
572 promote skipping in IFMs and TDT (Fig. S6 U). In *Rbfox1-IR<sup>KK110501</sup>* flies, we observed a  
573 slight decrease in exon 10 skipping in IFMs, no change in TDT and a slight increase in exon  
574 10 skipping in Abd. Taken together, our data suggest a complex regulatory dynamic where



575 Rbfox1 and Bru1 co-regulate some alternative splice events and independently regulate other  
576 events in a muscle-type specific manner.

577

### 578 **Rbfox1 regulates myofiber fate determining transcriptional activators**

579 Fiber-type identity and muscle type-specific gene expression is both specified and maintained  
580 through transcriptional regulation (Spletter and Schnorrer, 2014). Our bioinformatic analysis  
581 identified Rbfox1 binding motifs in more than 40% of transcription factors genes (Figure S3  
582 C), notably including *Mef2*, *extradenticle (exd)*, *homothorax (hth)*, *E2F transcription factor 1*  
583 (*E2f1*), *DP transcription factor (Dp)*, *apterous (ap)*, *twist (twi)*, *cut (ct)*, *vestigial (vg)* and  
584 *scalloped (sd)* (Table S1), which have all been shown to regulate adult muscle identity or  
585 myofiber gene expression (Dobi et al., 2015; Zappia and Frolov, 2016). Interestingly, even  
586 though it lacks Rbfox1 binding motifs, we observed regulation of Act88F expression in  
587 *Rbfox1*-RNAi IFMs. Thus, we next tested if Rbfox1 regulates transcriptional activators which  
588 could in turn regulate structural gene expression.

589 We first evaluated expression of *extradenticle (exd)*, a gene encoding a homeodomain  
590 protein which is suggested to be genetically upstream of Salm and Bru1 and in particular was  
591 shown to direct expression of *Act88F* (Bryantsev et al., 2012b). *exd* contains three Rbfox1  
592 binding sites, one in an intron and two in the 3'-UTR (Fig. S3 F). *exd* transcript levels were  
593 significantly down-regulated in IFMs from *Rbfox1-IR<sup>KK110518</sup>* knockdown flies (Fig. 7 A).  
594 This regulation is likely Rbfox1 level-dependent, as weaker knockdown with both *Rbfox1*-  
595 RNAi and *Rbfox1-IR<sup>27286</sup>* tended towards increased *exd* levels in IFM (Fig. 7A). We were not  
596 able to detect Rbfox1 binding to *exd* mRNA in RIP from adult thoraces of *Rbfox1<sup>CC00511</sup>* flies  
597 (data not shown), but we cannot rule out binding at earlier stages of muscle development.  
598 This indicates that Rbfox1 can regulate *exd* levels, but the nature of this regulation requires  
599 further investigation.

600 We next evaluated expression of *Mef2*, a well-characterized MADS-box transcription  
601 factor that regulates structural protein expression (Molkentin et al., 1995; Tanaka et al., 2008).  
602 *Mef2* contains five intronic, one 5'-UTR and one 3'-UTR Rbfox1 binding motifs (Fig. S3 G).  
603 *Mef2* mRNA levels were significantly up-regulated in IFMs with *Rbfox1*-RNAi and  
604 significantly down-regulated with Rbfox1 over-expression (Fig. 7 B). We were able to detect  
605 Rbfox1 binding to *Mef2* mRNA in RIP from adult thoraces of *Rbfox1<sup>CC00511</sup>* flies (Fig. 7 C),  
606 suggesting this regulation may be direct. As Rbfox1 binding sites in *Mef2* are concentrated in  
607 the upstream introns, we wondered if they might influence alternative 5'-UTR use. In our  
608 mRNA-Seq data, we observed both temporal and fiber-type specific use of *Mef2* 5'-UTR  
609 exons. The short 5'-UTR encoded by *Mef2-Ex17* is preferential to developing IFMs (Fig. S7  
610 A, B), which we could confirm using qPCR (Fig. 7 D). The longer 5'-UTR encoded by *Mef2-*  
611 *Ex20* is used in all muscles as they mature, while a second long 5'-UTR encoded by *Mef2-*  
612 *Ex21* is predominant in developing tubular muscle and myoblasts (Fig. S7 A, B).  
613 Interestingly, we could detect increased use of *Mef2-Ex17* in IFMs and Abd-M from adult  
614 *Rbfox1*-RNAi flies (Fig. 7 E) and a trend towards increased use of *Mef2-Ex20* and *Mef2-Ex21*  
615 in IFMs from *bru1-IR* and *bru1<sup>M3</sup>* flies (Fig. S7 A), suggesting that Rbfox1 and Bru1 may  
616 regulate use of these variable *Mef2* 5'-UTR regions.

617 Levels of Mef2 are known to affect muscle morphogenesis but not production of  
618 different isoforms (Gunthorpe et al., 1999), thus we next examined whether increased Mef2  
619 levels can induce muscle hypercontraction. Although Mef2-Gal4 driven overexpression of  
620 UAS-*Mef2* caused lethality after 48 hours, flies with Mhc-Gal4 driven overexpression survive  
621 to adulthood. These flies were flightless, displayed sarcomeric defects (Fig. S7 C, C') and had  
622 increased levels of TnI and Act88F in IFMs (Fig. S7 D, E). Notably, they do not display a  
623 hypercontraction defect. We conclude that increased levels of Mef2 can lead to an overall  
624 increase in many structural proteins, but hypercontraction observed upon changes in Rbfox1

625 and Bru1 levels likely results from alternative splicing defects and a possible isoform-  
626 imbalance amongst the structural proteins.

627 As a third and final example, we investigated if Rbfox1 regulates Spalt major (*Salm*),  
628 a C2H2-type zinc finger transcription factor that serves as master regulator of the fibrillar  
629 muscle fate (Schönbauer et al., 2011a). Although *Salm* does not contain canonical Rbfox1  
630 binding motifs, its expression is controlled by the homeodomain proteins Extradenticle (*Exd*)  
631 and Homothorax (*Hth*) (Bryantsev et al., 2012b) as well as Vestigial (*Vg*) and its co-factor  
632 Scalloped (*Sd*) (Schönbauer et al., 2011a). *Salm* is speculated to influence muscle  
633 diversification by modification of Mef2 level (Spletter and Schnorrer, 2014), and is known to  
634 regulate expression of *bru1*, *wupA* (*TnI*) and *Act88F* (Schönbauer et al., 2011a; Spletter et al.,  
635 2015; Spletter et al., 2018). Thus, we wanted to determine if it might interact with the Rbfox1  
636 regulatory hierarchy.

637 We first examined *Salm* mRNA levels in Rbfox1 knockdown muscle. *Salm* levels  
638 were significantly increased in IFM from *Rbfox1*-RNAi animals, but significantly decreased  
639 in IFMs from flies with Dcr2 enhanced *Rbfox1-IR*<sup>27286</sup> or *Rbfox1-IR*<sup>KK110518</sup> (Fig. 7 F). *Salm*  
640 levels in TDT were significantly decreased in all knockdown conditions, and were not  
641 affected in Abd (Fig. 7 F). This suggests that Rbfox1 can regulated *Salm*, and in the IFMs this  
642 regulation is dependent on the level of Rbfox1 expression. We also could show that *Rbfox1*  
643 mRNA levels were significantly decreased in both IFMs and TDT, but not in Abd, of *Salm-IR*  
644 flies (Fig. 7 G). As *Salm* is the master regulator of the fibrillar muscle fate, these results  
645 suggest there is cross-regulation between identity transcription factors and fiber-type specific  
646 splicing networks.

647 To investigate the physiological relevance of this interaction, we knocked down both  
648 *Salm* and *Rbfox1* in all muscle fiber types using Mef2-Gal4. We first confirmed that *Salm-IR*  
649 is efficient (Fig. S7 I) and verified previous findings (Schönbauer et al., 2011a) that *Salm-IR*

650 results in a tubular-muscle fate conversion of the IFMs and a loss of *bru1* expression (Fig. 7 I,  
651 Fig. S7 H, J). We also observed mild defects in myofibrillar patterning in the TDT with both  
652 *Salm-IR* (Fig. 7 L) and in *FRT-salm-FRT* mutants (Fig. S7 F-G). Double knockdown with  
653 *Rbfox1*-RNAi and *Salm-IR* resulted in greater than 60% lethality and severe locomotion  
654 defects (data not shown). IFMs were completely missing in hemi-thoraces from double  
655 knockdown flies (Fig. 7 J, quantification in Fig. S7 K), and although TDT was present, both  
656 myofibril structure and organization were aberrant (Fig. 7 M). Abd-M were also disorganized  
657 and frequently torn (Fig. 7 P, Fig. S7 K). This data indicates there is indeed a genetic  
658 interaction between *Salm* and *Rbfox1* in IFM- and TDT- development that is necessary for  
659 proper fiber-type gene expression and alternative splicing. Altogether, our results suggest that  
660 *Rbfox1* is involved in the regulation of fiber specific isoforms of structural proteins,  
661 particularly TnI, not only through directly regulating the splicing process, but also through  
662 hierarchical regulation of the fiber diversity pathway.

663

## 664 **Discussion**

665 Here we report the first detailed characterization of *Rbfox1* function in *Drosophila*  
666 muscle. We show that *Rbfox1* functions in a fiber-type and level-dependent manner to  
667 modulate both fibrillar and tubular muscle development. Collectively, our data demonstrate  
668 that *Rbfox1* operates in a complex regulatory network to fine-tune the transcript levels and  
669 alternative splicing pattern of fiber-type specific structural proteins such as Act88F, TnI, Strn-  
670 Mlck, Zasp52 and Mhc (Fig. 8 A). It does this directly, by binding to 5'-UTR and 3'-UTR  
671 regions to regulate transcript levels and binding to intronic regions to promote or inhibit  
672 alternative splice events. In addition, *Rbfox1* regulates transcriptional activators and other  
673 splicing factors such as *Bru1* which themselves regulate transcript levels and alternative  
674 splicing events (Fig. 8 A). We found the valence of several regulatory interactions for both

675 Rbfox1 and Bru1 to be expression level dependent in IFM (Fig. 8 B), suggesting this  
676 regulatory network is carefully balanced to respond to even small changes in gene expression.  
677 Moreover, as in vertebrates, Rbfox1 and Bru1 exhibit cross-regulatory interactions (Fig. 8 B)  
678 and genetically interact in IFM development. Interestingly, this cross-regulation extends to  
679 Salm, which suggests that RBPs such as Rbfox1 might actively regulate transcriptional  
680 networks to guide and refine acquisition of fiber-type specific properties during muscle  
681 differentiation.

682

### 683 **Rbfox1 function in muscle development is evolutionarily conserved**

684 Although the conserved nature of the Rbfox1 binding site (5'-UGCAUG-3') in  
685 mammalian genomes is well known (Denisov and Gelfand, 2003; Jin et al., 2003), its  
686 functional significance in muscle was appreciated only after genome wide studies showing  
687 that the regulatory element is enriched in introns flanking skeletal and cardiac muscle specific  
688 exons in humans and mice (Castle et al., 2008; Kalsotra et al., 2008). Transcripts of hundreds  
689 of structural genes are mis-spliced in Rbfox1 and Rbfox2 knockout mice, which  
690 developmentally have defects in muscle structure and function, and as adults fail to maintain  
691 skeletal muscle mass (Pedrotti et al., 2015; Singh et al., 2018). Knockdown of Rbfox1 and  
692 Rbfox2 in zebrafish leads to defects in alternative splicing, myofiber morphology, and  
693 function of both heart and skeletal muscle (Gallagher et al., 2011). Even mutants in the *C.*  
694 *elegans* homologue *fox-1* lead to aberrant myoblast migration and impaired egg-laying  
695 (Kuroyanagi et al., 2006; Mackereth, 2014). We previously reported that muscle-specific  
696 knockdown of *Rbfox1* in *Drosophila* results in short IFM sarcomeres (Nikonova et al., 2019).  
697 Here we extend those findings and show that as in vertebrates, Rbfox1 binding sites in the  
698 *Drosophila* genome are enriched in the introns and UTR-regions of muscle genes. Rbfox1  
699 knockdown affects all adult muscle fiber-types and is characterized by defects in muscle-

700 specific alternative splicing, myofibril and sarcomere structure and impaired muscle function.  
701 As tubular muscles in fly reflect the vertebrate skeletal muscle physiology and IFMs share  
702 characteristics with cardiac muscle, our observations are consistent with observations in  
703 vertebrates and strongly suggest that the function of Rbfox1 in muscle development is  
704 evolutionarily conserved.

705

### 706 **Rbfox1 regulates fiber-type specific isoform switches during development**

707 Studies from both vertebrates and *C. elegans* suggest that Rbfox1 modulates  
708 developmental isoform switches. In mouse, Rbfox1 and Rbfox2 regulate splicing of *Mef2D*  
709 *exon α2* during myotube differentiation allowing Mef2D to escape inhibitory PKD signaling  
710 and activate the late-muscle gene expression program (Runfola et al., 2015). In *C. elegans*,  
711 FOX-1/ASD-1 and SUP-12 regulate a developmental switch in expression of the fibroblast  
712 growth factor receptor *egl-15* that is necessary for myoblast migration and vulval muscle  
713 formation (Kuroyanagi et al., 2007; Mackereth, 2014). Rbfox1 is upregulated as cardiac cells  
714 differentiate and knockdown results in cardiac hypertrophy and splicing defects, consistent  
715 with the reduction in Rbfox1 expression in human patients with dilated cardiomyopathy and  
716 in hypertrophic heart from mouse and zebrafish (Gao et al., 2016). In myotonic dystrophy  
717 (DM1), where muscle exhibits a reversion from mature to embryonic splicing patterns (Blech-  
718 Hermoni et al., 2016), dystrophic muscle in mouse models and human patient cells produces  
719 a dominant-negative Rbfox1 isoform through mis-regulated alternative splicing that enhances  
720 DM1 phenotypes (Klinck et al., 2014). Previous studies in *Drosophila* have also identified  
721 transcriptional and isoform switches during normal IFM development (Burkart et al., 2007;  
722 González-Morales et al., 2019; Nongthomba et al., 2007; Orfanos and Sparrow, 2013; Spletter  
723 et al., 2018), and indeed we find that not only are Rbfox1 levels temporally regulated in IFM,  
724 but also splicing of genes with characterized isoform switches including *sls*, *Mhc*, *zasp52* and

725 *wupA* is altered after Rbfox1 knockdown. Notably, most of these events are also muscle fiber-  
726 type specific and result in the production of fibrillar and tubular specific isoforms (Spletter et  
727 al., 2015; Venables et al., 2012). This implies the developmental function of Rbfox1-mediated  
728 splicing is to establish fiber-type specific properties during muscle differentiation. Our data  
729 suggests it would be informative to investigate differences in Rbfox1 function between fiber-  
730 types in vertebrate models, as the role of Rbfox1 in generating fiber diversity is likely to be  
731 conserved in higher vertebrates and disease-relevant.

732

### 733 **Rbfox1-mediated splicing is subject to cross-regulatory interaction with Bru1**

734 The interactions between RBPs are important in defining alternative splicing patterns  
735 in muscle. For example, hnRNP-G and Tra2 $\beta$ , which are predominant in cardiac and skeletal  
736 myoblasts, respectively, have opposing effects on splicing of a *Dystrophin* exon that is  
737 abnormally incorporated in heart muscles of human patients with X-linked dilated  
738 cardiomyopathy (Nasim et al., 2003). Rbfox binding motifs are found to be co-enriched with  
739 MBNL and CELF motifs around the same groups of exons in human, mouse and chicken  
740 (Bland et al., 2010; Kalsotra et al., 2008; Merkin et al., 2012). Rbfox1 and MBNL co-regulate  
741 a significant number of alternative events altered in DM1 skeletal muscle (Klinck et al.,  
742 2014), while CELF2 and Rbfox2 co-regulate and co-bind introns flanking exons regulated in  
743 cardiac development or with altered expression in hearts of a Type I diabetes mouse model  
744 (Gazzara et al., 2017). CELF2 moreover represses Rbfox2 expression in heart, and  
745 overexpression of CELF1/2 or depletion of Rbfox2 leads to the same changes in splicing  
746 direction and magnitude (Gazzara et al., 2017). We see evidence for similar regulatory  
747 interactions between Rbfox1 and the CELF1/2 homolog Bru1 in our data from *Drosophila*.  
748 Loss of either Rbfox1 or Bru1 can lead to muscle hypercontraction, a condition similar to  
749 myopathies seen in reperfused rat hearts (Duncan, 1987; Monticello et al., 1996). Rbfox1 and

750 Bru1 cross-regulate each other's expression and co-regulate alternative splicing of events in  
751 *Mhc*, *zasp52*, *sls*, and *wupA*. Our data provide novel insight into this regulatory interaction, as  
752 we show the valence of both cross-regulation and splicing events is expression-level and  
753 fiber-type dependent. Moreover, Rbfox1 and Bru1 genetically interact in IFM development as  
754 knockdown of both RBPs leads to complete loss of myofibril structure. Our data show that  
755 *Drosophila* is an informative model for future studies to unravel conserved, fiber-type  
756 specific mechanisms of RBP cross-regulation, cooperation, antagonism and feedback on a  
757 genome-wide scale.

758

### 759 **Rbfox1 modulates fiber-type specific transcriptional networks**

760 Although it is an RBP, Rbfox is reported to modulate transcriptional networks. Rbfox2  
761 can interact with the Polycomb repressive complex 2 (PRC2) through a unique C-terminal  
762 domain and regulate transcription in mouse (Wei et al., 2016). In *Drosophila*, Rbfox1 can  
763 interact with Cubitus interruptus (Ci) and Suppressor of Hairless (Su(H)), transcription factors  
764 in the Hedgehog (Hh) and Notch (N) signaling pathways, respectively, to regulate vein-  
765 intervein and sensory organ specification in the wing disc (Shukla et al., 2017; Usha and  
766 Shashidhara, 2010). Our data indicate that in fly muscle, in contrast to these examples of  
767 protein-level interaction, Rbfox1 regulates mRNA transcript levels of transcription factors  
768 including *exd*, *salm*, and *Mef2*. Although the mechanism of *salm* regulation is unclear, *exd*  
769 and *Mef2* both are potentially regulated by direct 3'-UTR binding and/or through the splicing  
770 of alternative 5'-UTR sequences. It remains to be tested if the short 5'-UTR of *Mef2*  
771 negatively regulated by Rbfox1 is more or less stable than the long 5'-UTR preferentially  
772 used in tubular muscle. Interestingly, Rbfox1 regulates splicing of a MEF2A exon in mouse  
773 and zebrafish heart that is mis-spliced in cells from human patients with dilated  
774 cardiomyopathy (Gao et al., 2016), and Rbfox1 and Rbfox2 cooperatively regulate splicing of



775 Mef2D during C2C12 differentiation (Runfola et al., 2015). Our data thus support findings  
776 that Rbfox1 modulates transcription, but introduce a novel method of regulation, via  
777 regulating transcription factor transcript stability.

778         The conserved regulation of Mef2 by Rbfox proteins is particularly intriguing, as  
779 Mef2 is a key regulator of expression of most structural proteins during assembly of the  
780 sarcomere (Gunthorpe et al., 1999; Molkentin et al., 1995; Tanaka et al., 2008; Taylor and  
781 Hughes, 2017). In *Drosophila*, differential expression levels of Mef2 define corresponding  
782 fiber-type specific expression levels of structural proteins (Gunthorpe et al., 1999; Hughes et  
783 al., 1993). Given the thin to thick filament ratio is 6:1 in fibrillar muscles, and 8-12:1 in the  
784 tubular muscles (Bernstein et al., 1993), a fiber specific isoform of Mef2 might explain fiber  
785 specific changes in the expression of sarcomeric proteins. Additionally, knockdown of *Rbfox1*  
786 is able to partially rescue the hypercontraction phenotype in *wupA<sup>hdp-3</sup>* heterozygotes,  
787 indicating a role for Rbfox1 in maintaining the stoichiometry of structural proteins by  
788 regulating splicing/expression of TnI. Increased expression of Mef2, Bru1 and Salm  
789 combined with inclusion of IFM-specific *wupA-Ex4*, all favoured by low levels of Rbfox1,  
790 could generate a stoichiometric imbalance resulting in hypercontraction in the *Rbfox1*  
791 knockdown condition.

792         The fibrillar muscle fate is specified transcriptionally, where expression of Vestigial  
793 (Vg), Extradenticle (Exd) and Homothorax (Hth) in IFM progenitors induces Salm expression  
794 (Bryantsev et al., 2012b; Schönbauer et al., 2011b). Salm further instructs the fibrillar fate by  
795 directly or indirectly inducing Bru1 and more than 100 fibrillar-specific genes (Oas et al.,  
796 2014; Spletter et al., 2015). The mammalian ortholog of Salm, Sall1, is also involved in fate  
797 determination of cardiomyoblasts in mice (Morita et al., 2016). Studies so far report the  
798 positive regulation of these factors, but here we report the first evidence for negative  
799 regulation for fine tuning acquisition of muscle-type specific properties. Depending on its

800 expression level, *Rbfox1* can either promote or inhibit expression of *exd*, *salm* and *bru1*.  
801 Notably, *Rbfox1* promotes expression of the *bru1-RB* isoform which is preferentially used in  
802 TDT, indicating *Bru1* might have isoform-specific functions in different fiber-types. This is  
803 also possible for *Rbfox1* itself, as *Rbfox1* nuclear and cytoplasmic isoforms are reported to  
804 have distinct functions (Hamada et al., 2016) and we observe fiber-type differential use in  
805 *Rbfox1* exons. In addition, we show that *Salm* positively regulates *Rbfox1* levels in both IFM  
806 and TDT. This multi-level, cross-regulatory loop suggests that the fiber diversification  
807 network continuously integrates both RBP and transcriptional feedback to refine expression  
808 levels of key regulatory components, here *Bru1*, *Rbfox1*, *Salm*, *Exd* and *Mef2*, to ultimately  
809 fine-tune the expression level and ratio of structural protein isoforms. Such a mechanism may  
810 be broadly applicable to allow muscle fibers to flexibly adjust regulator levels during  
811 development, or to promote plasticity in response to exercise, aging, injury or disease.

812

### 813 **Materials and Methods**

814 A table of key resources is available as Supplemental Table 3.

815

### 816 **Fly stocks and crosses**

817 Fly stocks were maintained using standard culture conditions. Wildtype controls include  
818 either *w<sup>1118</sup>* or *Canton-S*. *Rbfox1*-GFP (*Rbfox1<sup>CC00511</sup>*) was generated as part of a protein  
819 enhancer trap library (Kelso et al., 2004), and does not alter protein function or localization.  
820 Fly stocks of *UAS-Rbfox1*-RNAi and *UAS-Rbfox1* were kind gifts from L. Shashidhara,  
821 IISER, Pune, India (Usha and Shashidhara, 2010). The deGrad-FP fly line *pUASPI-*  
822 *deGradFP/CyO; MKRS/TM6,Tb* (Caussinus et al., 2012) was a kind gift of Sonal Jaishwal,  
823 CCMB, India. deGradFP knockdown was carried-out during adult IFM development by  
824 temperature shifts of late third instar larvae. *Mhc<sup>P401S</sup>* (Nongthomba et al., 2003) is a myosin

825 mutant that minimizes acto-myosin force in IFM, while *wupA<sup>fliH</sup>* (Firdaus et al., 2015) and  
826 *wupA<sup>hdp3</sup>* (Barbas et al., 1993) are known hypercontraction mutants in *wupA* (TnI). RNAi  
827 lines were obtained from the Vienna Drosophila Resource Center (VDRC) including UAS-  
828 *Arrest*-RNAi (*Bru1-IR*) (41547, 48237, 41568) (Dietzl et al., 2007; Oas et al., 2014; Spletter  
829 et al., 2015), UAS-Salm-RNAi (*salm-IR*) (3029, 101052) (Schönbauer et al., 2011a), UAS-  
830 *Rbfox1-IR<sup>KK110518</sup>* (110518) or from the Bloomington Drosophila Stock Center (BDSC) UAS-  
831 *Rbfox1-IR<sup>27286</sup>* (TRiP27286). UAS-Mef2 lines were provided by Alberto Ferrus (Gunthorpe et  
832 al., 1999). UAS-Bru1-PA (also called UAS-*Arrest*) was kindly provided by Richard Cripps  
833 (Oas et al., 2014) and expresses the full-length *bru1-RA* mRNA from DGRC clone LD29068.  
834 A second UAS-Bru1-PA line was generated by cloning the full-length *bru1-RA* cDNA  
835 (obtained by RT-PCR from *w<sup>1118</sup>*) into the *pUAS-TattB* transformation vector (Bischof et al.,  
836 2007), and integrating into the attP-86Fb landing site. The *bru1<sup>M2</sup>* and *bru1<sup>M3</sup>* deletion alleles  
837 were generated using a CRISPR approach as described in (Zhang et al., 2014), where the C-  
838 terminal portion of the *bru1* coding region (including RRM2, the divergent domain and  
839 RRM3 for *bru1<sup>M2</sup>* and RRM3 and the 3'-UTR for *bru1<sup>M3</sup>*) was replaced by a selectable 3xP3-  
840 DsRed cassette. sgRNA sequences and homology arm primers are listed in Supplemental  
841 Table 2. Gal4 drivers used were: Mef2-Gal4 (Ranganayakulu et al., 1996) which drives in all  
842 muscle (maintained at 27 °C or 29 °C); UAS-Dcr2, Mef2-Gal4 which enhances RNAi  
843 efficiency (maintained at 22°C); Act5c-Gal4 which drives in all cells (maintained at 27°C and  
844 25°C); Mhc-Gal4 (Davis et al., 1996); UH3-Gal4 (Singh et al., 2014) is a driver with IFM  
845 specific expression after 36-40h APF (maintained at 27°C); Act88F-Gal4 (Bryantsev et al.,  
846 2012a) is a driver with IFM specific expression after 24h APF (maintained at 25°C) and  
847 Act79B-Gal4 (Dohn and Cripps, 2018) is a driver with TDT specific expression (maintained  
848 at 27°C). Temperature sensitive *Tubulin-Gal80<sup>ts</sup>*, as noted in figure panels and legends, was  
849 used to restrict some knockdown experiments to adult muscle development by a temperature

850 shift of late third instar larvae from 18 °C to 29 °C. *Rbfox1* over-expression with UH3-Gal4  
851 was induced 40h APF onwards to avoid lethality at earlier stages.

852

### 853 **Behavioral assays**

854 Flight behavior was tested as described previously (Drummond et al., 1991), or by  
855 introducing 30 adult males flies into a 1-meter long cylinder divided into 5 zones (Schnorrer  
856 et al., 2010). Flies landing in the top two zones are ‘normal fliers’, in the middle two zones  
857 are ‘weak fliers’ and at the bottom are ‘flightless’. Pupal eclosion (survival) was determined  
858 by counting the number of flies that eclose from at least 50 pupae of the appropriate genotype.  
859 Climbing ability was assayed using a modified rapid iterative negative geotaxis (RING)  
860 approach (Nichols et al., 2012). Adult males were collected on CO<sub>2</sub> and recovered at least 24  
861 hours before testing 3 times with a 1-minute recovery period for their ability to climb 5  
862 centimeters in a 3 second or 5 second timeframe. Jumping ability was assayed as described  
863 previously (Chechenova et al., 2017). After clipping the wings and 24 hours recovery, 10-15  
864 males were individually placed on A4 paper and gently pushed with a brush to stimulate the  
865 jump response. The start and the landing points were marked and the distance was calculated  
866 in centimeters.

867

### 868 **Rabbit anti-Bruno1 antibody generation**

869 The divergent domain (DIV) region of Bru1 was cloned using SLIC into pCOOFY4 to  
870 generate His6-MBP-DIV. Primers are available in Supplemental Table 2. Fusion to MBP was  
871 necessary to maintain solubility. The protein was expressed in *E. coli* BL21-RIL cells and  
872 induced with 0.2 mM IPTG at 60 °C overnight. Expressed protein was purified over Ni-NTA  
873 beads and then cleaved with HRV3C-protease. MBP was depleted by incubation with  
874 Amylose beads. Protein was then dialyzed in buffer (200 mM NaCl, 50 mM Tris, 20 mM

875 Imidazol) and sent as purified protein for antibody production (Pineda). Rabbit polyclonal  
876 antibodies were generated by Pineda according to a standard 120-day protocol. Resulting  
877 serum was affinity purified over an MBP column (to remove background antibodies generated  
878 against the MBP protein) followed by a column with beads coupled to Bru1-RA. Antibody  
879 bound to the column was eluted in citric acid and buffered to pH 7. Antibody was directly  
880 frozen in small aliquots in liquid nitrogen and stored at -80 °C until use.

881

### 882 **Immunofluorescence and microscopy**

883 Fly hemi-thoraces were prepared for polarized microscopy as described previously  
884 (Nongthomba and Ramachandra, 1999). The hemi-thoraces were observed in an Olympus  
885 SZX12 microscope and photographed using Olympus C-5060 camera under polarized light  
886 optics. For confocal microscopy, flies were bisected, fixed in 4% paraformaldehyde for 1h,  
887 washed with 0.3% PBTx (0.3% Triton X in PBS) for 15 min, and stained with 1:250  
888 phalloidin-TRITC for 20 min. Sections were mounted on slides after washes with PBTx.  
889 Images were obtained using a Carl Zeiss LSM 510 META confocal microscope.

890         Alternatively, IFMs and Abd-M were dissected and stained as previously described  
891 (Weitkumat and Schnorrer, 2014). All tissues were fixed for at least 30 minutes in 4% PFA in  
892 0.5% PBS-T (1x PBS + Triton-X100). For visualization of IFMs, thoraces were cut  
893 longitudinally with a microtome blade. Abdominal muscle was fixed on a black silicon  
894 dissection dish, after the ventral part of the abdomen was carefully removed together with fat,  
895 gut and other non-muscle tissues. TDT (jump) muscle was exposed by opening the cuticle  
896 sagittally using fine biological forceps. One tip of the forceps was kept parallel to the fly  
897 thorax and gently inserted into the wing socket, allowing the initial split of the cuticle without  
898 damaging underlying tissues. The remaining cuticle covering the T2 mesothorax region,  
899 ventrally from the leg socket up to the dorsal bristles, was carefully removed to expose the

900 underlying TDT muscle. Samples were blocked for 90 minutes at room temperature in 5%  
901 normal goat serum in PBS-T and stained with primary antibodies overnight at 4 °C. Rabbit  
902 anti-Bru1 1:500 and mouse anti-Lamin 1:100 (ADL67.10, DSHB) were used for staining.  
903 Samples were washed three times in 0.5% PBS-T for 10 min and incubated for 2 hours at  
904 room temperature with secondary conjugated antibodies (1:500) from Invitrogen (Molecular  
905 Probes), including Alexa488 goat anti-rabbit IgG, Alexa647 goat anti-mouse IgG, and  
906 rhodamine-phalloidin. Samples were washed three times in 0.5% PBS-T and mounted in  
907 Vectashield containing DAPI.

908 Confocal images were acquired on a Leica SP8X WLL upright using Leica LAS X  
909 software in the Core Facility Bioimaging at the Biomedical Center of the Ludwig-  
910 Maximilians-Universität München. Whole fly thorax images were taken with a HCPL  
911 FLUOTAR 10x/0.30 objective and detailed sarcomere structure was imaged with a HC PL  
912 APO 63x/1.4 OIL CS2 objective. Bru1 signal intensity was recorded at the same laser gain  
913 settings adjusted on the brightest control sample for each muscle type individually. All  
914 samples of same replicate were stained with the same antibody mix on the same day and  
915 imaged in the same imaging session.

916

### 917 **RNA isolation and RT-PCR**

918 For *Rbfox1*-RNAi experiments, thirty flies were bisected and dehydrated in 70% ethyl alcohol  
919 overnight. IFM or TDT was dissected, homogenised and RNA isolated using TRI Reagent  
920 (Sigma) following the manufacturer's instructions. RNA was confirmed using readings from  
921 Nanodrop software, and was converted to cDNA using a first strand cDNA synthesis kit  
922 (Fermentas, USA). Primers and PCR conditions are listed in Table S1.

923 For *Rbfox1*-IR<sup>KK110518</sup> and *Rbfox1*-IR<sup>27286</sup> experiments, IFM (from 30 flies) or TDT  
924 (from 60 flies) were dissected as previously described (Kao et al., 2019). For Abd-M,

925 abdominal carcass was prepared from 15 flies in pre-cooled 1xPBS using fine biological  
926 forceps to remove fat, gut, trachea and other non-muscle tissues through a posterior cut in the  
927 abdomen. The abdomen was then removed from the thorax using fine scissors and snap-  
928 frozen in 50 µl of TRIzol (TRIzol Reagent, Ambion) on dry ice and immediately stored at -80  
929 °C. Dissection times were limited to maximum 30 minutes. RNA was isolated using the  
930 manufacturers protocol. Total RNA samples were treated with DNaseI (NEB) and measured  
931 on a Qubit 2.0 Fluorometer (Invitrogen). Comparable total RNA quantities were used for  
932 reverse transcription with LunaScript RT SuperMix Kit (New England Biolabs). cDNA was  
933 amplified with Phusion polymerase for 30-36 cycles and resulting PCR products were  
934 separated on a standard 1% agarose gel next to a 100 bp ladder (NEB). PCR primers are  
935 listed in Supplemental Table 2, with *Ribosomal protein L32* (*RpL32*, also called *RP49*)  
936 serving as an internal control in all reactions.

937

#### 938 **RNA Immunoprecipitation (RIP) followed by cDNA synthesis**

939 The RIP protocol was modified from (Carreira-Rosario et al., 2016). Approximately 500 mg  
940 of thoraces (from *Rbfox1*<sup>CC00511</sup> cultured flies) were lysed in 1 mL of RIPA buffer (50 mM  
941 Tris-HCl, 200 mM NaCl, 0.4% NP-40, 0.5% sodium deoxycholate, 0.1% SDS, 2 mM EDTA,  
942 200 mM NaCl) with Sigma RNase inhibitor, pre-cleared with Protein-G magnetic  
943 Dynabeads, and incubated with mouse anti-GFP (Developmental Studies Hybridoma Bank  
944 (DSHB), 12A6) or IgG isotype (purified from normal mouse serum). The beads with  
945 immunoprecipitated RNA bound to Rbfox1-GFP were washed and treated with Proteinase K  
946 (25 minutes in 37 °C), followed by a TRI-reagent based RNA extraction, cDNA synthesis and  
947 PCR as described above.

948

#### 949 **Protein extraction and Western blotting**

950 For *Rbfox1*-RNAi experiments, IFMs from 20 flies were dissected, “skinned”, and thin  
951 filaments extracted as previously described (Vikhorev et al., 2010). These samples were run  
952 on SDS-PAGE and transferred onto a nitrocellulose membrane (Milipore, product no.  
953 IPVH00010), using a semi-dry transfer apparatus. Blots were stained with rabbit anti-Actin  
954 or rabbit anti-TnI (1:1000; a gift from A. Ferrus) or mouse anti-Tubulin (1:1000, Sigma) and  
955 washed with TBS-Triton X (0.1%). Blots were incubated with HRP-conjugated secondary  
956 anti-rabbit or anti-mouse antibodies (1:5000 in TBS-Triton X), washed and developed on an  
957 X-ray film in the dark.

958 For *Rbfox1*-IR<sup>KK110518</sup> and *Rbfox1*-IR<sup>27286</sup> experiments, IFM from 8 flies, TDT from  
959 20 flies or Abd from 6 flies was dissected as described above. Samples were homogenized in  
960 20 µl of freshly made SDS-buffer (2% SDS, 240 mM Tris pH6.8, 0.005% Bromophenol blue,  
961 40% glycerol, 5% β-mercaptoethanol), incubated at 95 °C for 3 min and stored at -20 °C.  
962 Samples were run on 10% SDS-PAGE for separation and then transferred onto nitrocellulose  
963 membranes (Amersham Protran 0.2 µm NC) for 2h at 120 V. Membranes were stained with  
964 Ponceau S (Sigma) to access the quality of the blotting. Membranes were de-stained and  
965 blocked with 5% non-fat milk solution in 0.5% Tween-TBS buffer (T-TBS) for 1h, washed  
966 and incubated for 1h at room temperature with primary antibodies (rabbit anti-Bru1, 1:500;  
967 rabbit anti-H2AZ, 1:2000). Membranes were washed three times with T-TBS for 15 min and  
968 incubated with goat anti-rabbit HRP-conjugated secondary antibodies (Bio-Rad) for 1 hour at  
969 room temperature. Following three rounds of washes, the membranes were developed using  
970 Immobilion Western chemiluminescent (Milipore) substrate and exposed to X-ray films (Fuji  
971 medical X-ray, Super RX-N).

972

973 **Co-immunoprecipitation and mass spectrometry**



974 Approximately 500 mg of thoraces (from *Rbfox1<sup>CC00511</sup>* cultured flies) were lysed in 1 mL of  
975 RIPA buffer with Sigma protease inhibitor mix, pre-cleared with Protein-G magnetic Dyna-  
976 beads (Thermo Scientific, 10030D), and incubated with mouse anti-GFP (DSHB, 12A6) or  
977 IgG isotype (purified from normal mouse serum). The beads with immunoprecipitated  
978 proteins bound to Rbfox1-GFP were washed in RIPA buffer, followed by protein elution and  
979 denaturation, as described previously (Carreira-Rosario et al., 2016). Proteins were analysed  
980 by SDS-PAGE and unique bands were cut and processed for mass spectrometric analysis  
981 following the protocol provided by the Proteomics facility, Molecular Biophysics Unit, Indian  
982 Institute of Science.

983

#### 984 **Image analysis**

985 Confocal image analysis was performed with Image J/Fiji (Schindelin et al., 2012). For every  
986 experiment 10 to 15 images were acquired from at least 10 individual flies. Fiber detachment  
987 was scored from Z-stacks of whole thorax images. Sarcomere length and width were  
988 measured using MyofibrilJ ((Spletter et al., 2018), <https://imagej.net/MyofibrilJ>) based on  
989 rhodamine-phalloidin staining. Analysis of Bru1 intensity was performed manually in Fiji  
990 from at least three nuclei per image. Analysis of semi-quantitative RT-PCR gels and Western  
991 Blots was performed using the ‘gel analysis’ feature in Fiji. *RpL32* and *H2AZ* were used as  
992 internal normalization controls for RT-PCR and Western analysis, respectively. Data were  
993 saved into Microsoft Excel. Plotting and statistical analysis were performed in GraphPad  
994 Prism 9.

995

#### 996 **Bioinformatics**

997 *Rbfox1* has been identified to bind (U)GCAUG motifs in both vertebrates and *Drosophila*  
998 (Nazario-Toole et al., 2018; Pedrotti et al., 2015). To identify possible *Rbfox1* targets in  
999 muscle, we first identified all TGCATG motifs in the genome using PWMScan

1000 (<https://ccg.epfl.ch/pwmtools/>). The BED output was converted to a GRanges object in R, and  
1001 sequence locations mapping to intron, 5'-UTR or 3'-UTR regions (based on Flybase  
1002 dmel\_r6.38 annotation files) were isolated. Gene identifiers were assigned based on genomic  
1003 coordinates, and sequences were filtered to match gene orientation (ie to retain sequences  
1004 present in the transcribed pre-mRNA). Lists of genes with Rbfox1 sites in introns, 5'-UTR or  
1005 3'-UTR regions were then subjected to enrichment analysis using PantherDB (Mi et al.,  
1006 2021), GOrrilla (Eden et al., 2009), or with custom gene sets (Spletter et al., 2018). Plots were  
1007 generated in R using packages listed in Supplemental Table 3.

1008 mRNA-Seq data used in this manuscript has been published previously (Spletter et al.,  
1009 2015; Spletter et al., 2018) and is available from GEO under accession numbers GSE63707,  
1010 GSE107247 and GSE143430. Data was mapped with STAR to ENSEMBL genome assembly  
1011 BDGP6.22 (annotation dmel\_r6.32 (FB2020\_01)), indexed with SAMtools and features  
1012 counted with featureCounts. Downstream analysis and visualization were performed in R  
1013 using the packages listed in Supplemental Table 3. Differential expression was analyzed with  
1014 DESeq2 and DEXSeq, which additionally generated normalized counts values. Read-tracks  
1015 were visualized on the UCSC Genome Browser. Splice junction reads were exported from  
1016 STAR, and junction use for hand-selected events was calculated as: (number of reads for  
1017 select junction  $D^1A^x$ ) / (total number of reads  $D^1A^1 + D^1A^2 \dots + D^1A^n$ ) \* 100, where D =  
1018 donor and A = acceptor. In this way we could determine the percent of junction reads from a  
1019 given donor that use acceptor "x", or swap A and D to determine the percent of junction reads  
1020 from a given acceptor coming from donor "x".

1021

1022 **Data availability**

1023 Raw numbers used to generate plots are available in Supplementary Table 4. mRNA-Seq data  
1024 are publicly available from GEO with accession numbers GSE63707, GSE107247 and  
1025 GSE143430.

1026

1027 **Acknowledgements:**

1028 We sincerely thank L. S. Shashidhara, R. Cripps, A. Ferrus, Sonal Jaishwal, Frank Schnorrer,  
1029 the Bloomington Drosophila Stock Centre (BDSC), the Vienna Drosophila Resource Center  
1030 (VDRC), and the Drosophila Stock Facility at NCBS, Bangalore, India, for providing flies.  
1031 MLS is grateful to Andreas Ladurner for generous support. We thank John Sparrow and  
1032 Shao-Yen Kao for inputs on manuscript preparation and critical comments. We thank Sandra  
1033 Esser for excellent technical assistance. We acknowledge the Core Facility Bioimaging at the  
1034 LMU Biomedical Center (Martinsried, DE) for confocal imaging support. We acknowledge  
1035 the Indian Institute of Science (IISc), the Department of Science and Technology (DST) (DST  
1036 FIST, 2008 – 2013 Ref. No. SR/FST/LSII-018/2007), the University Grant Commission  
1037 (UGC-SAP to MRDG: Ref. No. F.3-47/2009 (SAP-II) and the Department of Biotechnology  
1038 (DBT), Govt. of India, (DBT-IISC Partnership Program for Advanced Research in Biological  
1039 Sciences & Bioengineering Sanction Order No: DBT/BF/PRIns/2011-12/IISc/28.9.2012), the  
1040 Deutsche Forschungsgemeinschaft (MLS, 417912216), the Center for Integrated Protein  
1041 Science Munich (CIPSM) at the Ludwig-Maximilians-University München (MLS), the  
1042 Deutsche Gesellschaft für Muskelkranke e.V. (MLS), and the International Max Planck  
1043 Research School (EN) for financial assistance.

1044

1045 **Author Contributions**

1046

1047 Contributions are defined using CRediT role terminology (<https://casrai.org/credit/>).

1048

1049 Investigation (EN, KK, AM, CB),

1050 Validation (EN, AM),

1051 Writing – original draft (MLS, KK, UN),

1052 Writing – review & editing (EN, MLS, KK, AM, CB, UN),

1053 Conceptualization (MLS, UN),

1054 Formal analysis (MLS, KK, EN, AM),

1055 Visualization (MLS, EN, KK, AM),

1056 Supervision (MLS, UN),

1057 Funding acquisition (MLS, UN)

1058

1059 **Conflict of interest**

1060

1061 The authors declare they have no conflicts of interest.

1062

1063

1064 **References**

- 1065 Amir-Zilberstein, L., Blechman, J., Sztainberg, Y., Norton, W. H. J., Reuveny, A., Borodovsky, N.,  
1066 Tahor, M., Bonkowsky, J. L., Bally-Cuif, L., Chen, A., et al. (2012). Homeodomain protein  
1067 otp and activity-dependent splicing modulate neuronal adaptation to stress. *Neuron* 73, 279–  
1068 291.
- 1069 Anthony, J. C., Lang, C. H., Crozier, S. J., Anthony, T. G., MacLean, D. A., Kimball, S. R. and  
1070 Jefferson, L. S. (2002). Contribution of insulin to the translational control of protein synthesis  
1071 in skeletal muscle by leucine. *Am J Physiol Endocrinol Metab* 282, E1092-1101.
- 1072 Armstrong, R. B. and Phelps, R. O. (1984). Muscle fiber type composition of the rat hindlimb. *Am J*  
1073 *Anat* 171, 259–272.
- 1074 Auweter, S. D., Fasan, R., Reymond, L., Underwood, J. G., Black, D. L., Pitsch, S. and Allain, F. H.-  
1075 T. (2006). Molecular basis of RNA recognition by the human alternative splicing factor Fox-  
1076 1. *EMBO J* 25, 163–173.
- 1077 Barbas, J. A., Galceran, J., Torroja, L., Prado, A. and Ferrús, A. (1993). Abnormal muscle  
1078 development in the heldup3 mutant of *Drosophila melanogaster* is caused by a splicing defect  
1079 affecting selected troponin I isoforms. *Mol Cell Biol* 13, 1433–1439.
- 1080 Beall, C. J. and Fyrberg, E. (1991). Muscle abnormalities in *Drosophila melanogaster* heldup mutants  
1081 are caused by missing or aberrant troponin-I isoforms. *J. Cell Biol.* 114, 941–951.
- 1082 Begg, B. E., Jens, M., Wang, P. Y., Minor, C. M. and Burge, C. B. (2020). Concentration-dependent  
1083 splicing is enabled by Rbfox motifs of intermediate affinity. *Nat Struct Mol Biol* 27, 901–912.
- 1084 Bernstein, S. I., O'Donnell, P. T. and Cripps, R. M. (1993). Molecular genetic analysis of muscle  
1085 development, structure, and function in *Drosophila*. *Int Rev Cytol* 143, 63–152.
- 1086 Bessa, C., Matos, P., Jordan, P. and Gonçalves, V. (2020). Alternative Splicing: Expanding the  
1087 Landscape of Cancer Biomarkers and Therapeutics. *Int J Mol Sci* 21,.
- 1088 Bischof, J., Maeda, R. K., Hediger, M., Karch, F. and Basler, K. (2007). An optimized transgenesis  
1089 system for *Drosophila* using germ-line-specific phiC31 integrases. *Proc Natl Acad Sci U S A*  
1090 104, 3312–3317.
- 1091 Black, B. L. and Olson, E. N. (1998). Transcriptional control of muscle development by myocyte  
1092 enhancer factor-2 (MEF2) proteins. *Annu Rev Cell Dev Biol* 14, 167–196.
- 1093 Bland, C. S., Wang, E. T., Vu, A., David, M. P., Castle, J. C., Johnson, J. M., Burge, C. B. and  
1094 Cooper, T. A. (2010). Global regulation of alternative splicing during myogenic  
1095 differentiation. *Nucleic Acids Res* 38, 7651–7664.
- 1096 Blech-Hermoni, Y., Dasgupta, T., Coram, R. J. and Ladd, A. N. (2016). Identification of Targets of  
1097 CUG-BP, Elav-Like Family Member 1 (CELF1) Regulation in Embryonic Heart Muscle.  
1098 *PLoS ONE* 11, e0149061.
- 1099 Bottinelli, R. (2001). Functional heterogeneity of mammalian single muscle fibres: do myosin  
1100 isoforms tell the whole story? *Pflugers Arch* 443, 6–17.
- 1101 Bottinelli, R. and Reggiani, C. (2000). Human skeletal muscle fibres: molecular and functional  
1102 diversity. *Prog Biophys Mol Biol* 73, 195–262.

- 1103 Brudno, M., Gelfand, M. S., Spengler, S., Zorn, M., Dubchak, I. and Conboy, J. G. (2001).  
1104 Computational analysis of candidate intron regulatory elements for tissue-specific alternative  
1105 pre-mRNA splicing. *Nucleic Acids Res* 29, 2338–2348.
- 1106 Bryantsev, A. L., Baker, P. W., Lovato, T. L., Jaramillo, M. S. and Cripps, R. M. (2012a). Differential  
1107 requirements for Myocyte Enhancer Factor-2 during adult myogenesis in *Drosophila*. *Dev*  
1108 *Biol* 361, 191–207.
- 1109 Bryantsev, A. L., Duong, S., Brunetti, T. M., Chechenova, M. B., Lovato, T. L., Nelson, C., Shaw, E.,  
1110 Uhl, J. D., Gebelein, B. and Cripps, R. M. (2012b). Extradenticle and homothorax control  
1111 adult muscle fiber identity in *Drosophila*. *Dev. Cell* 23, 664–673.
- 1112 Burkart, C., Qiu, F., Brendel, S., Benes, V., Hååg, P., Labeit, S., Leonard, K. and Bullard, B. (2007).  
1113 Modular proteins from the *Drosophila* *sallimus* (*sls*) gene and their expression in muscles  
1114 with different extensibility. *J. Mol. Biol.* 367, 953–969.
- 1115 Carreira-Rosario, A., Bhargava, V., Hillebrand, J., Kollipara, R. K., Ramaswami, M. and Buszczak,  
1116 M. (2016). Repression of Pumilio Protein Expression by Rbfox1 Promotes Germ Cell  
1117 Differentiation. *Dev. Cell* 36, 562–571.
- 1118 Castle, J. C., Zhang, C., Shah, J. K., Kulkarni, A. V., Kalsotra, A., Cooper, T. A. and Johnson, J. M.  
1119 (2008). Expression of 24,426 human alternative splicing events and predicted cis regulation in  
1120 48 tissues and cell lines. *Nat. Genet.* 40, 1416–1425.
- 1121 Caussinus, E., Kanca, O. and Affolter, M. (2012). Fluorescent fusion protein knockout mediated by  
1122 anti-GFP nanobody. *Nature Structural and Molecular Biology* 19, 117–122.
- 1123 Chechenova, M. B., Maes, S., Oas, S. T., Nelson, C., Kiani, K. G., Bryantsev, A. L. and Cripps, R. M.  
1124 (2017). Functional redundancy and nonredundancy between two Troponin C isoforms in  
1125 *Drosophila* adult muscles. *MBoC* 28, 760–770.
- 1126 Clyne, P. J., Brotman, J. S., Sweeney, S. T. and Davis, G. (2003). Green fluorescent protein tagging  
1127 *Drosophila* proteins at their native genomic loci with small P elements. *Genetics* 165, 1433–  
1128 1441.
- 1129 Conboy, J. G. (2017). Developmental regulation of RNA processing by Rbfox proteins. *WIREs RNA*  
1130 8, e1398.
- 1131 Damianov, A. and Black, D. L. (2010). Autoregulation of Fox protein expression to produce dominant  
1132 negative splicing factors. *RNA* 16, 405–416.
- 1133 Dasbiswas, K., Hu, S., Schnorrer, F., Safran, S. A. and Bershadsky, A. D. (2018). Ordering of myosin  
1134 II filaments driven by mechanical forces: experiments and theory. *Philos. Trans. R. Soc.*  
1135 *Lond., B, Biol. Sci.* 373,.
- 1136 Davis, G. W., Schuster, C. M. and Goodman, C. S. (1996). Genetic dissection of structural and  
1137 functional components of synaptic plasticity. III. CREB is necessary for presynaptic  
1138 functional plasticity. *Neuron* 17, 669–679.
- 1139 de la Pompa, J. L., Garcia, J. R. and Ferrús, A. (1989). Genetic analysis of muscle development in  
1140 *Drosophila melanogaster*. *Dev Biol* 131, 439–454.
- 1141 Denisov, S. and Gelfand, M. S. (2003). Conservedness of the alternative splicing signal UGCAUG in  
1142 the human and mouse genomes. 48, S30–S35.

- 1143 Dietzl, G., Chen, D., Schnorrer, F., Su, K.-C., Barinova, Y., Fellner, M., Gasser, B., Kinsey, K.,  
1144 Oppel, S., Scheiblauer, S., et al. (2007). A genome-wide transgenic RNAi library for  
1145 conditional gene inactivation in *Drosophila*. *Nature* 448, 151–156.
- 1146 Dobi, K. C., Schulman, V. K. and Baylies, M. K. (2015). Specification of the somatic musculature in  
1147 *Drosophila*. *Wiley Interdiscip Rev Dev Biol* 4, 357–375.
- 1148 Dohn, T. E. and Cripps, R. M. (2018). Absence of the *Drosophila* jump muscle actin Act79B is  
1149 compensated by up-regulation of Act88F. *Dev Dyn* 247, 642–649.
- 1150 Duncan, C. J. (1987). Role of calcium in triggering rapid ultrastructural damage in muscle: a study  
1151 with chemically skinned fibres. *J Cell Sci* 87 ( Pt 4), 581–594.
- 1152 Eden, E., Navon, R., Steinfeld, I., Lipson, D. and Yakhini, Z. (2009). GOrilla: a tool for discovery and  
1153 visualization of enriched GO terms in ranked gene lists. *BMC Bioinformatics* 10, 48.
- 1154 Firdaus, H., Mohan, J., Naz, S., Arathi, P., Ramesh, S. R. and Nongthomba, U. (2015). A cis-  
1155 regulatory mutation in troponin-I of *Drosophila* reveals the importance of proper  
1156 stoichiometry of structural proteins during muscle assembly. *Genetics* 200, 149–165.
- 1157 Firulli, A. B. and Olson, E. N. (1997). Modular regulation of muscle gene transcription: a mechanism  
1158 for muscle cell diversity. *Trends Genet* 13, 364–369.
- 1159 Fu, X.-D. and Ares, M. (2014). Context-dependent control of alternative splicing by RNA-binding  
1160 proteins. *Nat Rev Genet* 15, 689–701.
- 1161 Fukumura, K., Kato, A., Jin, Y., Ideue, T., Hirose, T., Kataoka, N., Fujiwara, T., Sakamoto, H. and  
1162 Inoue, K. (2007). Tissue-specific splicing regulator Fox-1 induces exon skipping by  
1163 interfering E complex formation on the downstream intron of human F1gamma gene. *Nucleic  
1164 Acids Res* 35, 5303–5311.
- 1165 Gallagher, T. L., Arribere, J. A., Geurts, P. A., Exner, C. R. T., McDonald, K. L., Dill, K. K., Marr,  
1166 H. L., Adkar, S. S., Garnett, A. T., Amacher, S. L., et al. (2011). Rbfox-regulated alternative  
1167 splicing is critical for zebrafish cardiac and skeletal muscle functions. *Dev. Biol.* 359, 251–  
1168 261.
- 1169 Gao, C., Ren, S., Lee, J.-H., Qiu, J., Chapski, D. J., Rau, C. D., Zhou, Y., Abdellatif, M., Nakano, A.,  
1170 Vondriska, T. M., et al. (2016). RBFox1-mediated RNA splicing regulates cardiac  
1171 hypertrophy and heart failure. *J Clin Invest* 126, 195–206.
- 1172 Gazzara, M. R., Mallory, M. J., Roytenberg, R., Lindberg, J. P., Jha, A., Lynch, K. W. and Barash, Y.  
1173 (2017). Ancient antagonism between CELF and RBFOX families tunes mRNA splicing  
1174 outcomes. *Genome Res.* 27, 1360–1370.
- 1175 Gehman, L. T., Stoilov, P., Maguire, J., Damianov, A., Lin, C.-H., Shiue, L., Ares, M., Mody, I. and  
1176 Black, D. L. (2011). The splicing regulator Rbfox1 (A2BP1) controls neuronal excitation in  
1177 the mammalian brain. *Nat Genet* 43, 706–711.
- 1178 González-Morales, N., Xiao, Y. S., Schilling, M. A., Marescal, O., Liao, K. A. and Schöck, F. (2019).  
1179 Myofibril diameter is set by a finely tuned mechanism of protein oligomerization in  
1180 *Drosophila*. *Elife* 8,.
- 1181 Grifone, R., Shao, M., Saquet, A. and Shi, D.-L. (2020). RNA-Binding Protein Rbm24 as a  
1182 Multifaceted Post-Transcriptional Regulator of Embryonic Lineage Differentiation and  
1183 Cellular Homeostasis. *Cells* 9,.

- 1184 Gunthorpe, D., Beatty, K. E. and Taylor, M. V. (1999). Different levels, but not different isoforms, of  
1185 the *Drosophila* transcription factor DMEF2 affect distinct aspects of muscle differentiation.  
1186 *Dev. Biol.* 215, 130–145.
- 1187 Guo, W., Bharmal, S. J., Esbona, K. and Greaser, M. L. (2010). Titin diversity--alternative splicing  
1188 gone wild. *J Biomed Biotechnol* 2010, 753675.
- 1189 Hamada, N., Ito, H., Nishijo, T., Iwamoto, I., Morishita, R., Tabata, H., Momiyama, T. and Nagata,  
1190 K.-I. (2016). Essential role of the nuclear isoform of RBFOX1, a candidate gene for autism  
1191 spectrum disorders, in the brain development. *Sci Rep* 6, 30805.
- 1192 Hentze, M. W., Castello, A., Schwarzl, T. and Preiss, T. (2018). A brave new world of RNA-binding  
1193 proteins. *Nat. Rev. Mol. Cell Biol.* 19, 327–341.
- 1194 Ho, J. J. D., Man, J. H. S., Schatz, J. H. and Marsden, P. A. (2021). Translational remodeling by  
1195 RNA-binding proteins and noncoding RNAs. *Wiley Interdiscip Rev RNA* e1647.
- 1196 Hughes, S. M., Taylor, J. M., Tapscott, S. J., Gurley, C. M., Carter, W. J. and Peterson, C. A. (1993).  
1197 Selective accumulation of MyoD and myogenin mRNAs in fast and slow adult skeletal  
1198 muscle is controlled by innervation and hormones. *Development* 118, 1137–1147.
- 1199 Jagla, K., Kalman, B., Boudou, T., Hénon, S. and Batonnet-Pichon, S. (2017). Beyond mice:  
1200 Emerging and transdisciplinary models for the study of early-onset myopathies. *Semin. Cell*  
1201 *Dev. Biol.* 64, 171–180.
- 1202 Jawkar, S. and Nongthomba, U. (2020). Indirect flight muscles in *Drosophila melanogaster* as a  
1203 tractable model to study muscle development and disease. *Int J Dev Biol* 64, 167–173.
- 1204 Jin, Y., Suzuki, H., Maegawa, S., Endo, H., Sugano, S., Hashimoto, K., Yasuda, K. and Inoue, K.  
1205 (2003). A vertebrate RNA-binding protein Fox-1 regulates tissue-specific splicing via the  
1206 pentanucleotide GCAUG. *EMBO J.* 22, 905–912.
- 1207 Kablar, B. and Rudnicki, M. A. (2000). Skeletal muscle development in the mouse embryo. *Histol*  
1208 *Histopathol* 15, 649–656.
- 1209 Kalsotra, A. and Cooper, T. A. (2011). Functional consequences of developmentally regulated  
1210 alternative splicing. *Nat. Rev. Genet.* 12, 715–729.
- 1211 Kalsotra, A., Xiao, X., Ward, A. J., Castle, J. C., Johnson, J. M., Burge, C. B. and Cooper, T. A.  
1212 (2008). A postnatal switch of CELF and MBNL proteins reprograms alternative splicing in  
1213 the developing heart. *Proc Natl Acad Sci U S A* 105, 20333–20338.
- 1214 Kao, S.-Y., Nikonova, E., Ravichandran, K. and Spletter, M. L. (2019). Dissection of *Drosophila*  
1215 *melanogaster* Flight Muscles for Omics Approaches. *J Vis Exp*.
- 1216 Kelso, R. J., Buszczak, M., Quiñones, A. T., Castiblanco, C., Mazzalupo, S. and Cooley, L. (2004).  
1217 Flytrap, a database documenting a GFP protein trap insertion screen in *Drosophila*  
1218 *melanogaster*. *Nucleic Acids Research* 32, D418–D420.
- 1219 Kishor, A., Fritz, S. E. and Hogg, J. R. (2019). Nonsense-mediated mRNA decay: The challenge of  
1220 telling right from wrong in a complex transcriptome. *Wiley Interdiscip Rev RNA* 10, e1548.
- 1221 Klinck, R., Fourier, A., Thibault, P., Toutant, J., Durand, M., Lapointe, E., Caillet-Boudin, M.-L.,  
1222 Sergeant, N., Gourdon, G., Meola, G., et al. (2014). RBFOX1 cooperates with MBNL1 to



- 1223 control splicing in muscle, including events altered in myotonic dystrophy type 1. *PLoS ONE*  
1224 9, e107324.
- 1225 Kuroyanagi, H. (2009). Fox-1 family of RNA-binding proteins. *Cell. Mol. Life Sci.* 66, 3895–3907.
- 1226 Kuroyanagi, H., Kobayashi, T., Mitani, S. and Hagiwara, M. (2006). Transgenic alternative-splicing  
1227 reporters reveal tissue-specific expression profiles and regulation mechanisms in vivo. *Nat*  
1228 *Methods* 3, 909–915.
- 1229 Kuroyanagi, H., Ohno, G., Mitani, S. and Hagiwara, M. (2007). The Fox-1 family and SUP-12  
1230 coordinately regulate tissue-specific alternative splicing in vivo. *Mol Cell Biol* 27, 8612–  
1231 8621.
- 1232 Lee, J.-A., Tang, Z.-Z. and Black, D. L. (2009). An inducible change in Fox-1/A2BP1 splicing  
1233 modulates the alternative splicing of downstream neuronal target exons. *Genes Dev.* 23,  
1234 2284–2293.
- 1235 Lemke, S. B. and Schnorrer, F. (2017). Mechanical forces during muscle development. *Mech. Dev.*  
1236 144, 92–101.
- 1237 López-Martínez, A., Soblechero-Martín, P., de-la-Puente-Ovejero, L., Nogales-Gadea, G. and  
1238 Arechavala-Gomez, V. (2020). An Overview of Alternative Splicing Defects Implicated in  
1239 Myotonic Dystrophy Type I. *Genes (Basel)* 11,.
- 1240 Lunde, B. M., Moore, C. and Varani, G. (2007). RNA-binding proteins: modular design for efficient  
1241 function. *Nat Rev Mol Cell Biol* 8, 479–490.
- 1242 Mackereth, C. D. (2014). Splicing factor SUP-12 and the molecular complexity of apparent  
1243 cooperativity. *Worm* 3, e991240.
- 1244 Majesky, M. W. (2007). Developmental basis of vascular smooth muscle diversity. *Arterioscler*  
1245 *Thromb Vasc Biol* 27, 1248–1258.
- 1246 Merkin, J., Russell, C., Chen, P. and Burge, C. B. (2012). Evolutionary dynamics of gene and isoform  
1247 regulation in mammalian tissues. *Science* 338, 1593–1599.
- 1248 Mi, H., Ebert, D., Muruganujan, A., Mills, C., Albu, L.-P., Mushayamaha, T. and Thomas, P. D.  
1249 (2021). PANTHER version 16: a revised family classification, tree-based classification tool,  
1250 enhancer regions and extensive API. *Nucleic Acids Res* 49, D394–D403.
- 1251 Michele, D. E. and Campbell, K. P. (2003). Dystrophin-glycoprotein complex: post-translational  
1252 processing and dystroglycan function. *J Biol Chem* 278, 15457–15460.
- 1253 Molkenin, J. D., Black, B. L., Martin, J. F. and Olson, E. N. (1995). Cooperative activation of muscle  
1254 gene expression by MEF2 and myogenic bHLH proteins. *Cell* 83, 1125–1136.
- 1255 Monticello, T. M., Sargent, C. A., McGill, J. R., Barton, D. S. and Grover, G. J. (1996). Amelioration  
1256 of ischemia/reperfusion injury in isolated rats hearts by the ATP-sensitive potassium channel  
1257 opener BMS-180448. *Cardiovasc Res* 31, 93–101.
- 1258 Morita, Y., Andersen, P., Hotta, A., Tsukahara, Y., Sasagawa, N., Hayashida, N., Koga, C.,  
1259 Nishikawa, M., Saga, Y., Evans, S. M., et al. (2016). Sall1 transiently marks undifferentiated  
1260 heart precursors and regulates their fate. *J Mol Cell Cardiol* 92, 158–162.

- 1261 Nakahata, S. and Kawamoto, S. (2005). Tissue-dependent isoforms of mammalian Fox-1 homologs  
1262 are associated with tissue-specific splicing activities. *Nucleic Acids Res.* 33, 2078–2089.
- 1263 Nasim, M. T., Chernova, T. K., Chowdhury, H. M., Yue, B.-G. and Eperon, I. C. (2003). HnRNP G  
1264 and Tra2beta: opposite effects on splicing matched by antagonism in RNA binding. *Hum Mol*  
1265 *Genet* 12, 1337–1348.
- 1266 Nayak, A. and Amrute-Nayak, M. (2020). SUMO system - a key regulator in sarcomere organization.  
1267 *FEBS J* 287, 2176–2190.
- 1268 Nazario-Toole, A. E., Robalino, J., Okrah, K., Corrada-Bravo, H., Mount, S. M. and Wu, L. P. (2018).  
1269 The Splicing Factor RNA-Binding Fox Protein 1 Mediates the Cellular Immune Response in  
1270 *Drosophila melanogaster*. *J Immunol* 201, 1154–1164.
- 1271 Nichols, C. D., Becnel, J. and Pandey, U. B. (2012). Methods to Assay *Drosophila* Behavior. *J Vis*  
1272 *Exp.*
- 1273 Nikonova, E., Kao, S.-Y., Ravichandran, K., Wittner, A. and Spletter, M. L. (2019). Conserved  
1274 functions of RNA-binding proteins in muscle. *Int. J. Biochem. Cell Biol.* 110, 29–49.
- 1275 Nikonova, E., Kao, S.-Y. and Spletter, M. L. (2020). Contributions of alternative splicing to muscle  
1276 type development and function. *Semin. Cell Dev. Biol.*
- 1277 Nongthomba, U., Cummins, M., Clark, S., Vigoreaux, J. O. and Sparrow, J. C. (2003). Suppression of  
1278 muscle hypercontraction by mutations in the myosin heavy chain gene of *Drosophila*  
1279 *melanogaster*. *Genetics* 164, 209–222.
- 1280 Nongthomba, U., Clark, S., Cummins, M., Ansari, M., Stark, M. and Sparrow, J. C. (2004). Troponin  
1281 I is required for myofibrillogenesis and sarcomere formation in *Drosophila* flight muscle. *J*  
1282 *Cell Sci* 117, 1795–1805.
- 1283 Nongthomba, U., Ansari, M., Thimmaiya, D., Stark, M. and Sparrow, J. (2007). Aberrant splicing of  
1284 an alternative exon in the *Drosophila* troponin-T gene affects flight muscle development.  
1285 *Genetics* 177, 295–306.
- 1286 Oas, S. T., Bryantsev, A. L. and Cripps, R. M. (2014). Arrest is a regulator of fiber-specific  
1287 alternative splicing in the indirect flight muscles of *Drosophila*. *J. Cell Biol.* 206, 895–908.
- 1288 Orfanos, Z. and Sparrow, J. C. (2013). Myosin isoform switching during assembly of the *Drosophila*  
1289 flight muscle thick filament lattice. *J Cell Sci* 126, 139–148.
- 1290 Peckham, M., Molloy, J. E., Sparrow, J. C. and White, D. C. (1990). Physiological properties of the  
1291 dorsal longitudinal flight muscle and the tergal depressor of the trochanter muscle of  
1292 *Drosophila melanogaster*. *J Muscle Res Cell Motil* 11, 203–215.
- 1293 Pedrotti, S., Giudice, J., Dagnino-Acosta, A., Knoblauch, M., Singh, R. K., Hanna, A., Mo, Q., Hicks,  
1294 J., Hamilton, S. and Cooper, T. A. (2015). The RNA-binding protein Rbfox1 regulates  
1295 splicing required for skeletal muscle structure and function. *Human Molecular Genetics* 24,  
1296 2360–2374.
- 1297 Pette, D. and Staron, R. S. (2001). Transitions of muscle fiber phenotypic profiles. *Histochem Cell*  
1298 *Biol* 115, 359–372.
- 1299 Picchiarelli, G. and Dupuis, L. (2020). Role of RNA Binding Proteins with prion-like domains in  
1300 muscle and neuromuscular diseases. *Cell Stress* 4, 76–91.

- 1301 Pistoni, M., Ghigna, C. and Gabellini, D. (2010). Alternative splicing and muscular dystrophy. *RNA*  
1302 *Biol* 7, 441–452.
- 1303 Plantié, E., Migocka-Patrzałek, M., Daczewska, M. and Jagla, K. (2015). Model organisms in the  
1304 fight against muscular dystrophy: lessons from drosophila and Zebrafish. *Molecules* 20,  
1305 6237–6253.
- 1306 Pringle, J. W. S. (1981). The Bidder Lecture, 1980. The evolution of fibrillar muscle in insects. *J.*  
1307 *Exp. Biol.* 94, 1–14.
- 1308 Ranganayakulu, G., Schulz, R. A. and Olson, E. N. (1996). Wingless signaling induces nautilus  
1309 expression in the ventral mesoderm of the *Drosophila* embryo. *Dev Biol* 176, 143–148.
- 1310 Ravanidis, S., Kattan, F.-G. and Doxakis, E. (2018). Unraveling the Pathways to Neuronal  
1311 Homeostasis and Disease: Mechanistic Insights into the Role of RNA-Binding Proteins and  
1312 Associated Factors. *Int J Mol Sci* 19,.
- 1313 Runfola, V., Sebastian, S., Dilworth, F. J. and Gabellini, D. (2015). Rbfox proteins regulate tissue-  
1314 specific alternative splicing of Mef2D required for muscle differentiation. *J Cell Sci* 128,  
1315 631–637.
- 1316 Schiaffino, S. and Reggiani, C. (2011). Fiber types in mammalian skeletal muscles. *Physiol. Rev.* 91,  
1317 1447–1531.
- 1318 Schiaffino, S., Sandri, M. and Murgia, M. (2007). Activity-dependent signaling pathways controlling  
1319 muscle diversity and plasticity. *Physiology (Bethesda)* 22, 269–278.
- 1320 Schiaffino, S., Reggiani, C. and Murgia, M. (2020). Fiber type diversity in skeletal muscle explored  
1321 by mass spectrometry-based single fiber proteomics. *Histol Histopathol* 35, 239–246.
- 1322 Schindelin, J., Arganda-Carreras, I., Frise, E., Kaynig, V., Longair, M., Pietzsch, T., Preibisch, S.,  
1323 Rueden, C., Saalfeld, S., Schmid, B., et al. (2012). Fiji: an open-source platform for  
1324 biological-image analysis. *Nat Methods* 9, 676–682.
- 1325 Schnorrer, F., Schönbauer, C., Langer, C. C. H., Dietzl, G., Novatchkova, M., Schernhuber, K.,  
1326 Fellner, M., Azaryan, A., Radolf, M., Stark, A., et al. (2010). Systematic genetic analysis of  
1327 muscle morphogenesis and function in *Drosophila*. *Nature* 464, 287–291.
- 1328 Schönbauer, C., Distler, J., Jährling, N., Radolf, M., Dodt, H.-U., Frasch, M. and Schnorrer, F.  
1329 (2011a). Spalt mediates an evolutionarily conserved switch to fibrillar muscle fate in insects.  
1330 *Nature* 479, 406–409.
- 1331 Schönbauer, C., Distler, J., Jährling, N., Radolf, M., Dodt, H.-U., Frasch, M. and Schnorrer, F.  
1332 (2011b). Spalt mediates an evolutionarily conserved switch to fibrillar muscle fate in insects.  
1333 *Nature* 479, 406–409.
- 1334 Sellier, C., Cerro-Herreros, E., Blatter, M., Freyermuth, F., Gaucherot, A., Ruffenach, F., Sarkar, P.,  
1335 Puymirat, J., Udd, B., Day, J. W., et al. (2018). rbFOX1/MBNL1 competition for CCUG  
1336 RNA repeats binding contributes to myotonic dystrophy type 1/type 2 differences. *Nat*  
1337 *Commun* 9, 2009.
- 1338 Shukla, J. P., Deshpande, G. and Shashidhara, L. S. (2017). Ataxin 2-binding protein 1 is a context-  
1339 specific positive regulator of Notch signaling during neurogenesis in *Drosophila*  
1340 melanogaster. *Development* 144, 905–915.

- 1341 Singh, S. H., Kumar, P., Ramachandra, N. B. and Nongthomba, U. (2014). Roles of the troponin  
1342 isoforms during indirect flight muscle development in *Drosophila*. *J Genet* 93, 379–88.
- 1343 Singh, R. K., Kolonin, A. M., Fiorotto, M. L. and Cooper, T. A. (2018). Rbfox-Splicing Factors  
1344 Maintain Skeletal Muscle Mass by Regulating Calpain3 and Proteostasis. *Cell Rep* 24, 197–  
1345 208.
- 1346 Smith, C. W., Patton, J. G. and Nadal-Ginard, B. (1989). Alternative splicing in the control of gene  
1347 expression. *Annu Rev Genet* 23, 527–577.
- 1348 Spletter, M. L. and Schnorrer, F. (2014). Transcriptional regulation and alternative splicing cooperate  
1349 in muscle fiber-type specification in flies and mammals. *Exp. Cell Res.* 321, 90–98.
- 1350 Spletter, M. L., Barz, C., Yeroslaviz, A., Schönbauer, C., Ferreira, I. R. S., Sarov, M., Gerlach, D.,  
1351 Stark, A., Habermann, B. H. and Schnorrer, F. (2015). The RNA-binding protein Arrest  
1352 (Bruno) regulates alternative splicing to enable myofibril maturation in *Drosophila* flight  
1353 muscle. *EMBO Rep.* 16, 178–191.
- 1354 Spletter, M. L., Barz, C., Yeroslaviz, A., Zhang, X., Lemke, S. B., Bonnard, A., Brunner, E., Cardone,  
1355 G., Basler, K., Habermann, B. H., et al. (2018). A transcriptomics resource reveals a  
1356 transcriptional transition during ordered sarcomere morphogenesis in flight muscle. *Elife* 7,.
- 1357 Swank, D. M., Braddock, J., Brown, W., Lesage, H., Bernstein, S. I. and Maughan, D. W. (2006). An  
1358 Alternative Domain Near the ATP Binding Pocket of *Drosophila* Myosin Affects Muscle  
1359 Fiber Kinetics. *Biophysical Journal* 90, 2427–2435.
- 1360 Tanaka, K. K. K., Bryantsev, A. L. and Cripps, R. M. (2008). Myocyte Enhancer Factor 2 and  
1361 Chorion Factor 2 Collaborate in Activation of the Myogenic Program in *Drosophila*. *Mol Cell*  
1362 *Biol* 28, 1616–1629.
- 1363 Taylor, M. V. and Hughes, S. M. (2017). Mef2 and the skeletal muscle differentiation program.  
1364 *Semin. Cell Dev. Biol.* 72, 33–44.
- 1365 Usha, N. and Shashidhara, L. S. (2010). Interaction between Ataxin-2 Binding Protein 1 and Cubitus-  
1366 interruptus during wing development in *Drosophila*. *Dev Biol* 341, 389–399.
- 1367 Venables, J. P., Tazi, J. and Juge, F. (2012). Regulated functional alternative splicing in *Drosophila*.  
1368 *Nucleic Acids Res* 40, 1–10.
- 1369 Vikhorev, P. G., Vikhoreva, N. N., Cammarato, A. and Sparrow, J. C. (2010). In vitro motility of  
1370 native thin filaments from *Drosophila* indirect flight muscles reveals that the held-up 2 TnI  
1371 mutation affects calcium activation. *J Muscle Res Cell Motil* 31, 171–179.
- 1372 Wei, C., Xiao, R., Chen, L., Cui, H., Zhou, Y., Xue, Y., Hu, J., Zhou, B., Tsutsui, T., Qiu, J., et al.  
1373 (2016). RBFox2 Binds Nascent RNA to Globally Regulate Polycomb Complex 2 Targeting in  
1374 Mammalian Genomes. *Mol Cell* 62, 875–889.
- 1375 Weitkunat, M. and Schnorrer, F. (2014). A guide to study *Drosophila* muscle biology. *Methods* 68, 2–  
1376 14.
- 1377 Wells, L., Whelan, S. A. and Hart, G. W. (2003). O-GlcNAc: a regulatory post-translational  
1378 modification. *Biochem Biophys Res Commun* 302, 435–441.
- 1379 Zappia, M. P. and Frolov, M. V. (2016). E2F function in muscle growth is necessary and sufficient for  
1380 viability in *Drosophila*. *Nature Communications* 7, 1–16.

1381 Zhang, X., Koolhaas, W. H. and Schnorrer, F. (2014). A versatile two-step CRISPR- and RMCE-  
1382 based strategy for efficient genome engineering in *Drosophila*. *G3 (Bethesda)* 4, 2409–2418.

1383

1384

1385

1386 **Figure Legends:**

1387 **Figure 1: Rbfox1 is differentially expressed between fibrillar and tubular muscle.**

1388 **A-F.** The *Rbfox1*<sup>CC00511</sup> (Rbfox1-GFP) protein trap line was used to study expression of  
1389 Rbfox1. **A)** Wing discs of L3 larvae (propidium iodide (PI), red). **B)** IFMs at 24h after  
1390 puparium formation (APF) show Rbfox1 expression in completely split templates. **C)**  
1391 IFMs at 40h APF with Rbfox1 expression during initiation of assembly of sarcomere  
1392 structure. **D and E)** IFMs at 58h and 72h APF during sarcomere maturation. **F)** Rbfox1 is  
1393 expressed in 2-day old adult IFMs. (Arrow indicates GFP positive cells, green; phalloidin  
1394 stained actin, red; Scale bars = 10  $\mu$ m.). **G-H)** mRNA-Seq data from *w*<sup>1118</sup> reported as  
1395 normalized counts show differential expression of Rbfox1 across IFM development (G)  
1396 and between 1d adult fiber types (H). Significance levels based on DESeq2 analysis (\* p  
1397 < 0.01, \*\* p < 0.001, \*\*\* p < 0.0001). **I-L)** Confocal microscopy of the *Rbfox1*-GFP  
1398 (*Rbfox1*<sup>CC00511</sup>) line shows Rbfox1 expression in adult tubular muscles including  
1399 abdominal muscles (Abd-M), TDT, gut and leg (GFP, green; phalloidin stained actin,  
1400 red). Scale bars = 2  $\mu$ m. **M)** qPCR and representative semi-quantitative gel images  
1401 showing relative expression of *Rbfox1* at the mRNA level in adult *Canton-S* across  
1402 muscle fiber types. *RpL32*, also known as *RP49*, was used as a normalizing control.

1403

1404 **Figure 2: Rbfox1 is necessary for tubular TDT and Abd-M development.**

1405 **A)** Quantification of the percent of pupae that eclose for controls and Rbfox1 knockdown  
1406 flies. Genotypes as labelled. **B)** Quantification of the percent of pupae that eclose for  
1407 UAS-Dcr2, Mef2-Gal4 driven *Rbfox1-IR*<sup>27286</sup> and *Rbfox1-IR*<sup>KK110518</sup> knockdown at 22 °C,  
1408 25 °C and 27 °C. **C)** Representative image of the eclosion defect in *Rbfox1*-RNAi. **D)**  
1409 Quantification of climbing ability measured by how many flies are able to climb 5  
1410 centimetres (cm) in 3 seconds (s). **E)** Quantification of jumping ability measured as the

1411 distance in cm a startled fly can jump. **F-O**) Single plane confocal images showing  
1412 myofibril and sarcomere morphology of the TDT (F-J) and Abd-M (K-O). Myofibril  
1413 structure is altered in *Rbfox1* knockdown conditions, including disorganized myofibril  
1414 structure (arrow in G, I), frayed myofibrils (arrow in J, O), and loss of sarcomere  
1415 architecture (arrow in L, N). “Z” indicates z-discs. Scale bars = 5  $\mu$ m. **P**) Quantification  
1416 of sarcomere length in TDT. **Q**) Quantification of sarcomere length in Abd-M. Error bars  
1417 show standard deviation. Significance in D, E, P, Q determined by ANOVA and post-  
1418 hoc Tukey (not significant, ns; \*=  $p < 0.05$ ; \*\* =  $p < 0.01$ ; \*\*\* =  $p < 0.001$ ).

1419

1420 **Figure 3: Rbfox1 knockdown results in IFM myofibril defects and**  
1421 **hypercontraction-mediated myofiber loss.**

1422 **A-B)** Quantification of flight ability after *Rbfox1* knockdown. Genotypes as noted. **C-E)**  
1423 Confocal Z-stack images (C-E) of IFM myofiber structure (Scale bars = 5  $\mu$ m) and single  
1424 plane images (C'-E') of myofibril and sarcomere structure after *Rbfox1* knockdown.  
1425 Note the short sarcomeres and frayed myofibrils (arrow in D', E'). **F)** Quantification of  
1426 myofiber ripping and detachment phenotypes in C-E. **G-H)** Quantification of IFM  
1427 sarcomere length and myofibril width in C'-E'. Error bars show standard deviation.  
1428 Significance determined by ANOVA and post-hoc Tukey (not significant, ns; \*=  $p <$   
1429  $0.05$ ; \*\* =  $p < 0.01$ ; \*\*\* =  $p < 0.001$ ). **I-K)** Polarized microscopy images of hemi-thorax  
1430 from wild type (I), *Rbfox1*-RNAi (J) and *Rbfox1*-RNAi, *Mhc*<sup>P401S</sup> (K) flies. **I'-K')** Single-  
1431 plane confocal images showing phalloidin-stained sarcomeric structure from wild type  
1432 (I'), *Rbfox1*-RNAi (J') and *Rbfox1*-RNAi, *Mhc*<sup>P401S</sup> (K') flies. The *Mhc*<sup>P401S</sup> allele  
1433 suppresses myofiber loss and sarcomere phenotypes. **L)** Quantification of myofiber  
1434 detachment in J and K.

1435

1436 **Figure 4: Expression of structural proteins in IFM is regulated by Rbfox1.**

1437 **A)** Western blot for TnI, Act88F and Tubulin protein levels in *Rbfox1*-RNAi IFM. **B-C)**

1438 Quantification of TnI (B) and Act88F (C) expression levels from (A), normalized against

1439 Tubulin signal. **D)** Western blot for TnI, Act88F and Tubulin protein levels in IFM with

1440 UH3-Gal4 driven *Rbfox1* overexpression (*Rbfox1* OE). **E-F)** Quantification of TnI (E)

1441 and Act88F (F) expression levels from (B), normalized against Tubulin signal. Error bars

1442 in B, C, E, F show standard deviation; data from 3 biological replicates. Significance is

1443 from paired t-test (not significant, ns; \*=  $p < 0.05$ ; \*\* =  $p < 0.01$ ). **G)** Western blot

1444 confirming *Rbfox1*-GFP (*Rbfox1*<sup>CC00511</sup>) is selectively immunoprecipitated with anti-

1445 GFP antibody. **H, H'**- Gels showing RNA immunoprecipitation (RIP) followed by RT-

1446 PCR from *Rbfox1*-GFP thoraces. mRNA from *Act88F*, which does not have an *Rbfox1*

1447 binding site, is not detected via RIP (H), while *wupA* (TnI) mRNA can be detected via

1448 RIP (red arrowhead, H'), indicating direct *Rbfox1* binding. **I-L)** Polarized microscopy

1449 images of hemi-thoraxes from *wupA*<sup>fl<sup>i</sup>H</sup> hemizygous males (I), *wupA*<sup>fl<sup>i</sup>H</sup>, *Rbfox1*-RNAi

1450 males (J), *wupA*<sup>hdp-3/+</sup> heterozygous females (K), and *wupA*<sup>hdp-3/+</sup>, *Rbfox1*-RNAi females

1451 (L) with detached IFM myofibers (cyan arrow). Scale bars = 100  $\mu$ m **M)** Quantification

1452 of myofiber attachment in I-L reveals a partial rescue in *wupA*<sup>hdp-3/+</sup>, *Rbfox1*-RNAi

1453 females. Significance is from paired t-test, \*\* =  $p < 0.01$ . **N)** RT-qPCR for *wupA* mRNA

1454 transcript levels in IFM from *Canton-S*, *wupA*<sup>fl<sup>i</sup>H</sup>, and *wupA*<sup>fl<sup>i</sup>H</sup>, *Rbfox1*-RNAi males. **O)**

1455 RT-qPCR for *wupA-6b1* mRNA transcript levels in IFM from *Canton-S*, *wupA*<sup>hdp-3/+</sup>, and

1456 *wupA*<sup>hdp-3/+</sup>, *Rbfox1*-RNAi females. Significance is from paired t-test (not significant, ns;

1457 \*\*\* =  $p < 0.001$ ).

1458

1459 **Figure 5: Rbfox1 regulates expression of the RNA-binding protein Bru1.**



1460 **A)** Diagram of the *bruno1* (*bru1*) locus. The *bru1-RA* and *bru1-RB* isoforms, target  
1461 region of the rabbit anti-Bru1 antibody (magenta), region deleted in the *bru1<sup>M2</sup>* allele  
1462 (purple), and TGCATG Rbfox1 binding motifs (light blue) are indicated. Exons, red;  
1463 UTR, black; RT-PCR primers, green. Not drawn to scale. **B-J)** Confocal images of  
1464 immunostaining with rabbit anti-Bru1 in IFM (B-D), TDT (E-G) and abdominal muscle  
1465 (Abd-M) (H-J). Bru1 signal is reduced with *Rbfox1-IR<sup>KK110518</sup>* (C, F, I) and absent in  
1466 *bru1<sup>M2</sup>* mutant muscle (D, G, J). Bru1, green; DAPI, magenta; Scale bars = 5  $\mu$ m. **K)**  
1467 Quantification of Bru1 fluorescence levels in B-J. Significance determined by ANOVA  
1468 and post-hoc Tukey in comparison to both wild-type (*w<sup>1118</sup>*) and Gal4 alone (*Mef2-Gal4*  
1469 *x w<sup>1118</sup>*) controls (not significant, ns; \*= p < 0.05; \*\*\* = p < 0.001). **L)** Western blot of  
1470 Bru1 protein levels in IFM, TDT and abdominal carcass (Abd). Levels of Bru1-PA  
1471 isoform (at 64 kDa) do not change, while levels of the Bru1-PB isoform (at 88 kDa)  
1472 decrease in *Rbfox1-IR<sup>KK110518</sup>* muscle. H2AZ was used as a loading control. **M)**  
1473 Quantification of fold change in band intensity in L, normalized to H2AZ and control  
1474 IFM expression levels. *w<sup>1118</sup>*, white; *Rbfox1-IR<sup>KK110518</sup>*, red. **N)** Semi-quantitative RT-  
1475 PCR with primers specific to *bru1-RB* (primers 5 + 8) or common to all *bru1* isoforms  
1476 (primers 7 + 8). *RpL32* (*RP49*) was used as a control. **O)** Quantification of fold change in  
1477 band intensity in N, normalized to *RpL32* and control IFM expression levels.  
1478 Significance in M and O determined by ANOVA and post-hoc Tukey (not significant,  
1479 ns; \*= p < 0.05; \*\* = p < 0.01, \*\*\* = p < 0.001).

1480

1481 **Figure 6: Rbfox1 and Bru1 genetically interact in IFM myogenesis and regulate the**  
1482 **alternative splicing of sarcomere genes.**

1483 **A-D)** Confocal projections of hemithoraces showing IFMs (A-D) from *w<sup>1118</sup>*, *bru1<sup>M2</sup>*,  
1484 *Rbfox1-IR<sup>27286</sup>* and *bru1<sup>M2</sup>*, *Rbfox1-IR<sup>27286</sup>* flies. Arrowheads indicate aberrant, torn

1485 myofibers. Scale bars = 100  $\mu\text{m}$ . **E-H**) Single-plane confocal images from IFM, showing  
1486 torn myofibrils (yellow arrows) with short sarcomeres and actin inclusions (cyan arrows)  
1487 in *bru1<sup>M2</sup>* (F) and *Rbfox1-IR<sup>27286</sup>* (G). *bru1<sup>M2</sup>*, *Rbfox1-IR<sup>27286</sup>* demonstrates genetic  
1488 interaction and loss of myofibril structure (H). **I-P**) Single-plane confocal images from  
1489 TDT (I-L) and Abd-M (M-P) from *w<sup>1118</sup>*, *bru1<sup>M2</sup>*, *Rbfox1-IR<sup>27286</sup>* and *bru1<sup>M2</sup>*, *Rbfox1-*  
1490 *IR<sup>27286</sup>* flies. Myofibrils in *Rbfox1* knockdown muscles are disorganized (orange arrows),  
1491 have actin inclusions (cyan arrows) and are often torn (yellow arrows). Scale bars = 5  
1492  $\mu\text{m}$ . **Q-R**) Quantification of sarcomere length (Q) and myofibril width (R) in IFM. **S-T**)  
1493 Quantification of sarcomere length in TDT (S) and Abd-M (T). Significance determined  
1494 in comparison to *w<sup>1118</sup>* by ANOVA and post-hoc Tukey (not significant, ns; \*=  $p < 0.05$ ;  
1495 \*\*\* =  $p < 0.001$ ). **U**) RT-PCR for select alternative splice events in *wupA* (magenta),  
1496 *Zasp52* (blue) and *Mhc* (green). Genotypes as labeled. Primer locations and alternative  
1497 isoforms are diagrammed on the right. Exon numbers are based on annotation  
1498 FB2021\_01. UTR regions, tan.

1499

1500 **Figure 7: Rbfox1 regulates expression of myogenic transcription factors *exd* and**  
1501 ***Mef2* and genetically interacts with *salM* in IFM development.**

1502 **A**) RT-qPCR (*Rbfox1*-RNAi) and semi-quantitative RT-PCR (*Rbfox1-IR<sup>27286</sup>*, *Rbfox1-*  
1503 *IR<sup>KK110518</sup>*) quantification of the fold change in *exd* transcript levels in IFM and TDT  
1504 across the *Rbfox1* knockdown series. Data was normalized by *RpL32* levels. **B**) RT-  
1505 qPCR quantification of the fold change in *Mef2* mRNA expression in IFM with *Rbfox1-*  
1506 RNAi or *Rbfox1* OE. Significance is from paired t-test (\* =  $p < 0.05$ ). **C**) RIP using the  
1507 *Rbfox1<sup>CC00511</sup>* line followed by RT-PCR indicates *Rbfox1* binds to *Mef2* mRNA (red  
1508 arrowhead). **D**) Semi-quantitative RT-PCR demonstrating that *Mef2* isoforms containing  
1509 exon 17 and thus a short 5'-UTR (see also Fig. S3 G, Fig. S7 A, B) are preferentially

1510 expressed in wildtype IFM. **E)** RT-PCR detects increased use of *Mef2-Ex17* in *Rbfox1*-  
1511 RNAi IFM and Abd-M. **F)** RT-qPCR (*Rbfox1*-RNAi) and semi-quantitative RT-PCR  
1512 (*Rbfox1-IR*<sup>27286</sup>, *Rbfox1-IR*<sup>KK110518</sup>) quantification of the fold change in *salm* transcript  
1513 levels in IFM, TDT and Abd across the *Rbfox1* knockdown series. Data was normalized  
1514 by *RpL32* levels. **G)** Fold change in *Rbfox1* transcript levels in IFM, TDT and Abd  
1515 normalized to *RpL32* after *salm-IR* at 27 °C or 29 °C, as determined by RT-qPCR (29 °C)  
1516 and semi-quantitative RT-PCR (27 °C). Significance in A, F, G determined by ANOVA  
1517 and post-hoc Tukey (not significant, ns; \*= p < 0.05, \*\*= p < 0.01, \*\*\*= p < 0.001),  
1518 error bars indicated standard deviation. **H-J)** Polarized microscopy images of  
1519 hemithoraces showing a reduction in myofiber number (stars) with *Rbfox1*-RNAi (H)  
1520 and *salm-IR* (I), and a complete loss of IFMs with double *Rbfox1*-RNAi, *salm-IR*  
1521 knockdown (J). TDT, yellow arrowhead; quantification, Fig. S7 K). Scale bars = 100  
1522 μm. **K-P)** Single plane confocal images of TDT (K-M) and Abd-M (N-P) showing  
1523 abnormal myofibril structure and tearing (arrows) in *Rbfox1*-RNAi, *salm-IR*, and *Rbfox1*-  
1524 RNAi, *salm-IR* knockdown tubular muscle. Quantification, Fig. S7 K; Scale bars = 5  
1525 μm.

1526

1527 **Figure 8: Model of the Rbfox1 fiber-type specific regulatory network and function**  
1528 **in *Drosophila* muscle development.**

1529 **A)** Rbfox1 regulates transcript levels and alternative splicing of target genes. It can do  
1530 this directly by binding UTR or intronic sequences, respectively. Rbfox1 also regulates  
1531 levels of transcriptional activators such as Exd, Mef2 and Salm which in turn affect  
1532 transcription levels as well as the RNA-binding protein Bru1 which regulates alternative  
1533 splicing. Ultimately, this defines fiber-type specific expression levels and splice isoform  
1534 usage of sarcomeric genes. RNA-binding proteins, orange; Rbfox1, blue outline;

1535 transcription factors, magenta; structural proteins, green. **B)** Rbfox1 regulatory network  
1536 events confirmed in this manuscript in fibrillar IFM (light grey, top) or tubular TDT or  
1537 Abd-M (dark grey, bottom). Symbol definitions: arrow, positive regulation; flat-ended  
1538 arrow, negative regulation; double-ended arrow, level-dependent bivalent regulation;  
1539 circular arrow, autoregulation; paired arrows, cross-regulation; red, alternative exon;  
1540 black, transcript or protein level. Oval fill colors as in A. Exon numbers (Ex) according  
1541 to annotation release FB2021\_01.

Figure 1

bioRxiv preprint doi: <https://doi.org/10.1101/2021.05.09.443278>; this version posted May 10, 2021. The copyright holder for this preprint (which was not certified by peer review) is the author/funder, who has granted bioRxiv a license to display the preprint in perpetuity. It is made available under a [CC-BY-NC-ND 4.0 International license](https://creativecommons.org/licenses/by-nc-nd/4.0/).

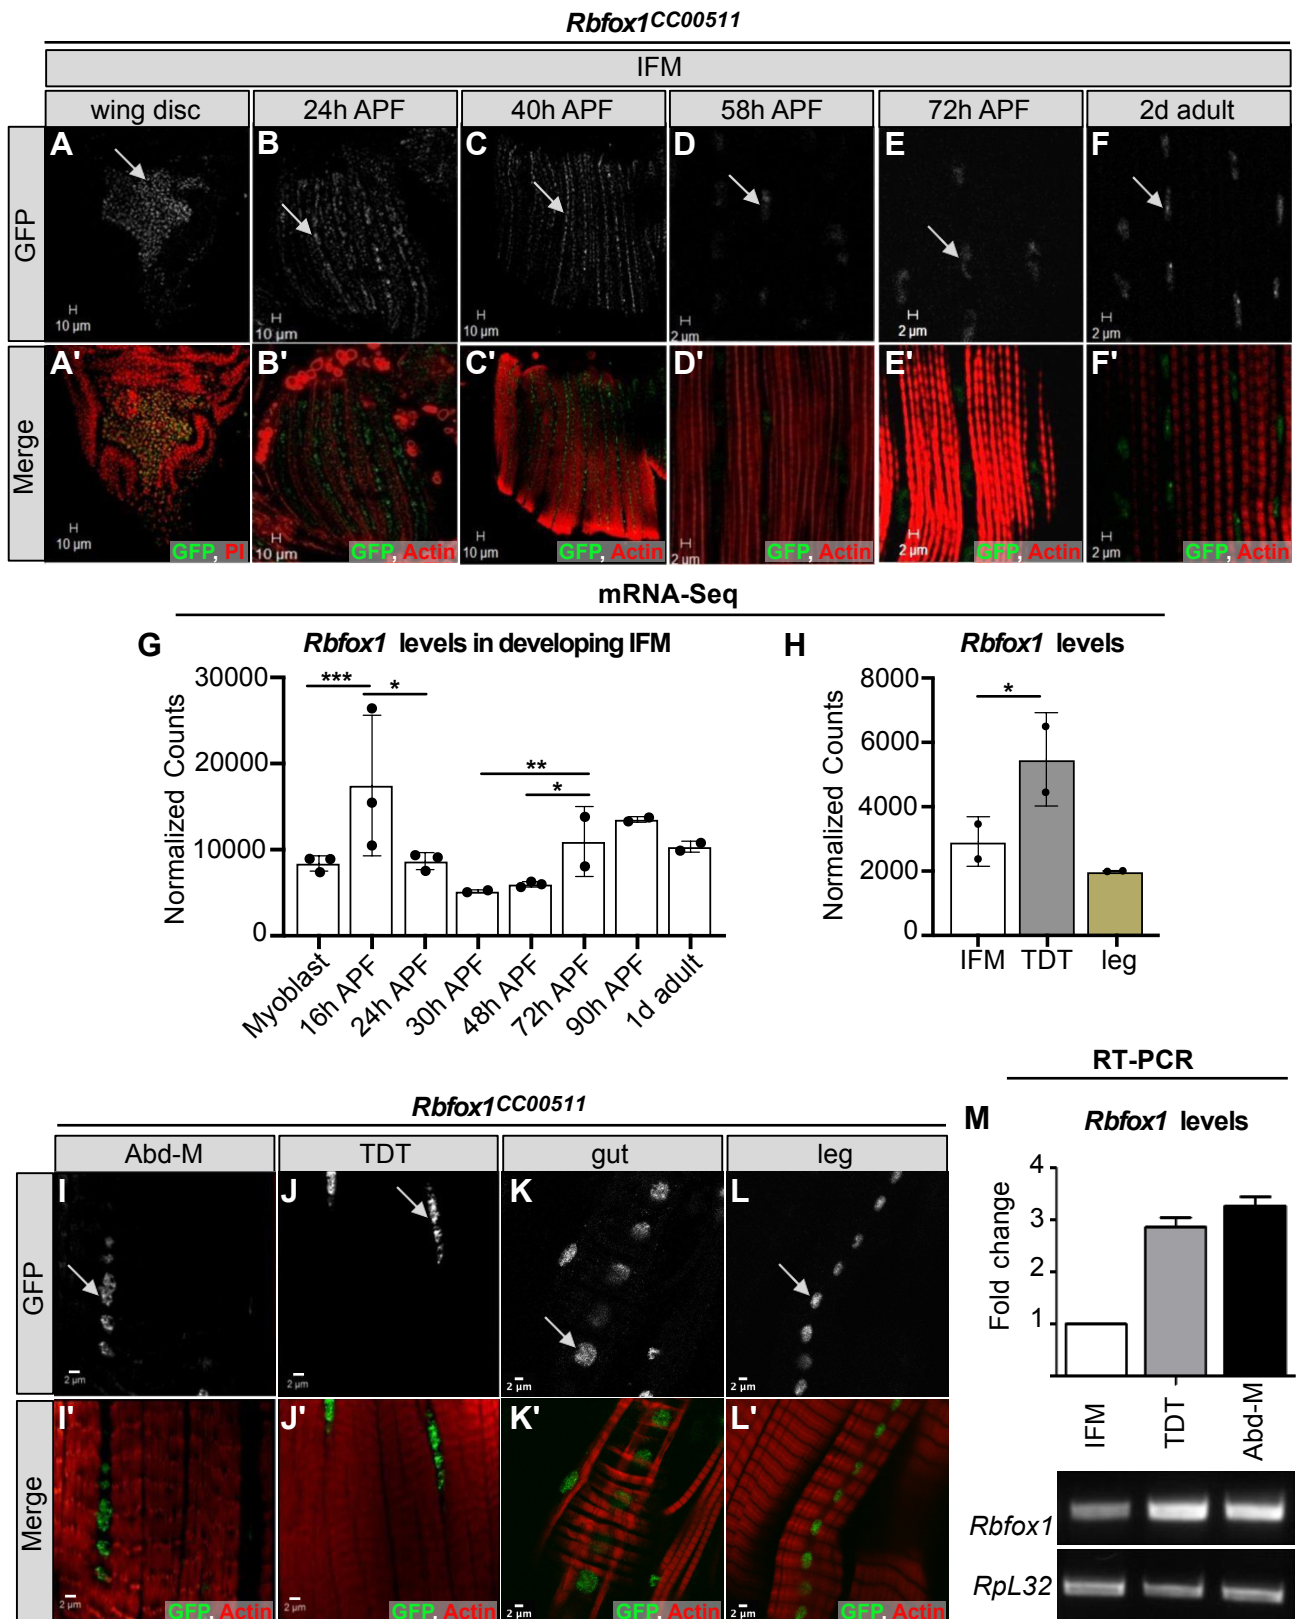

Figure 2

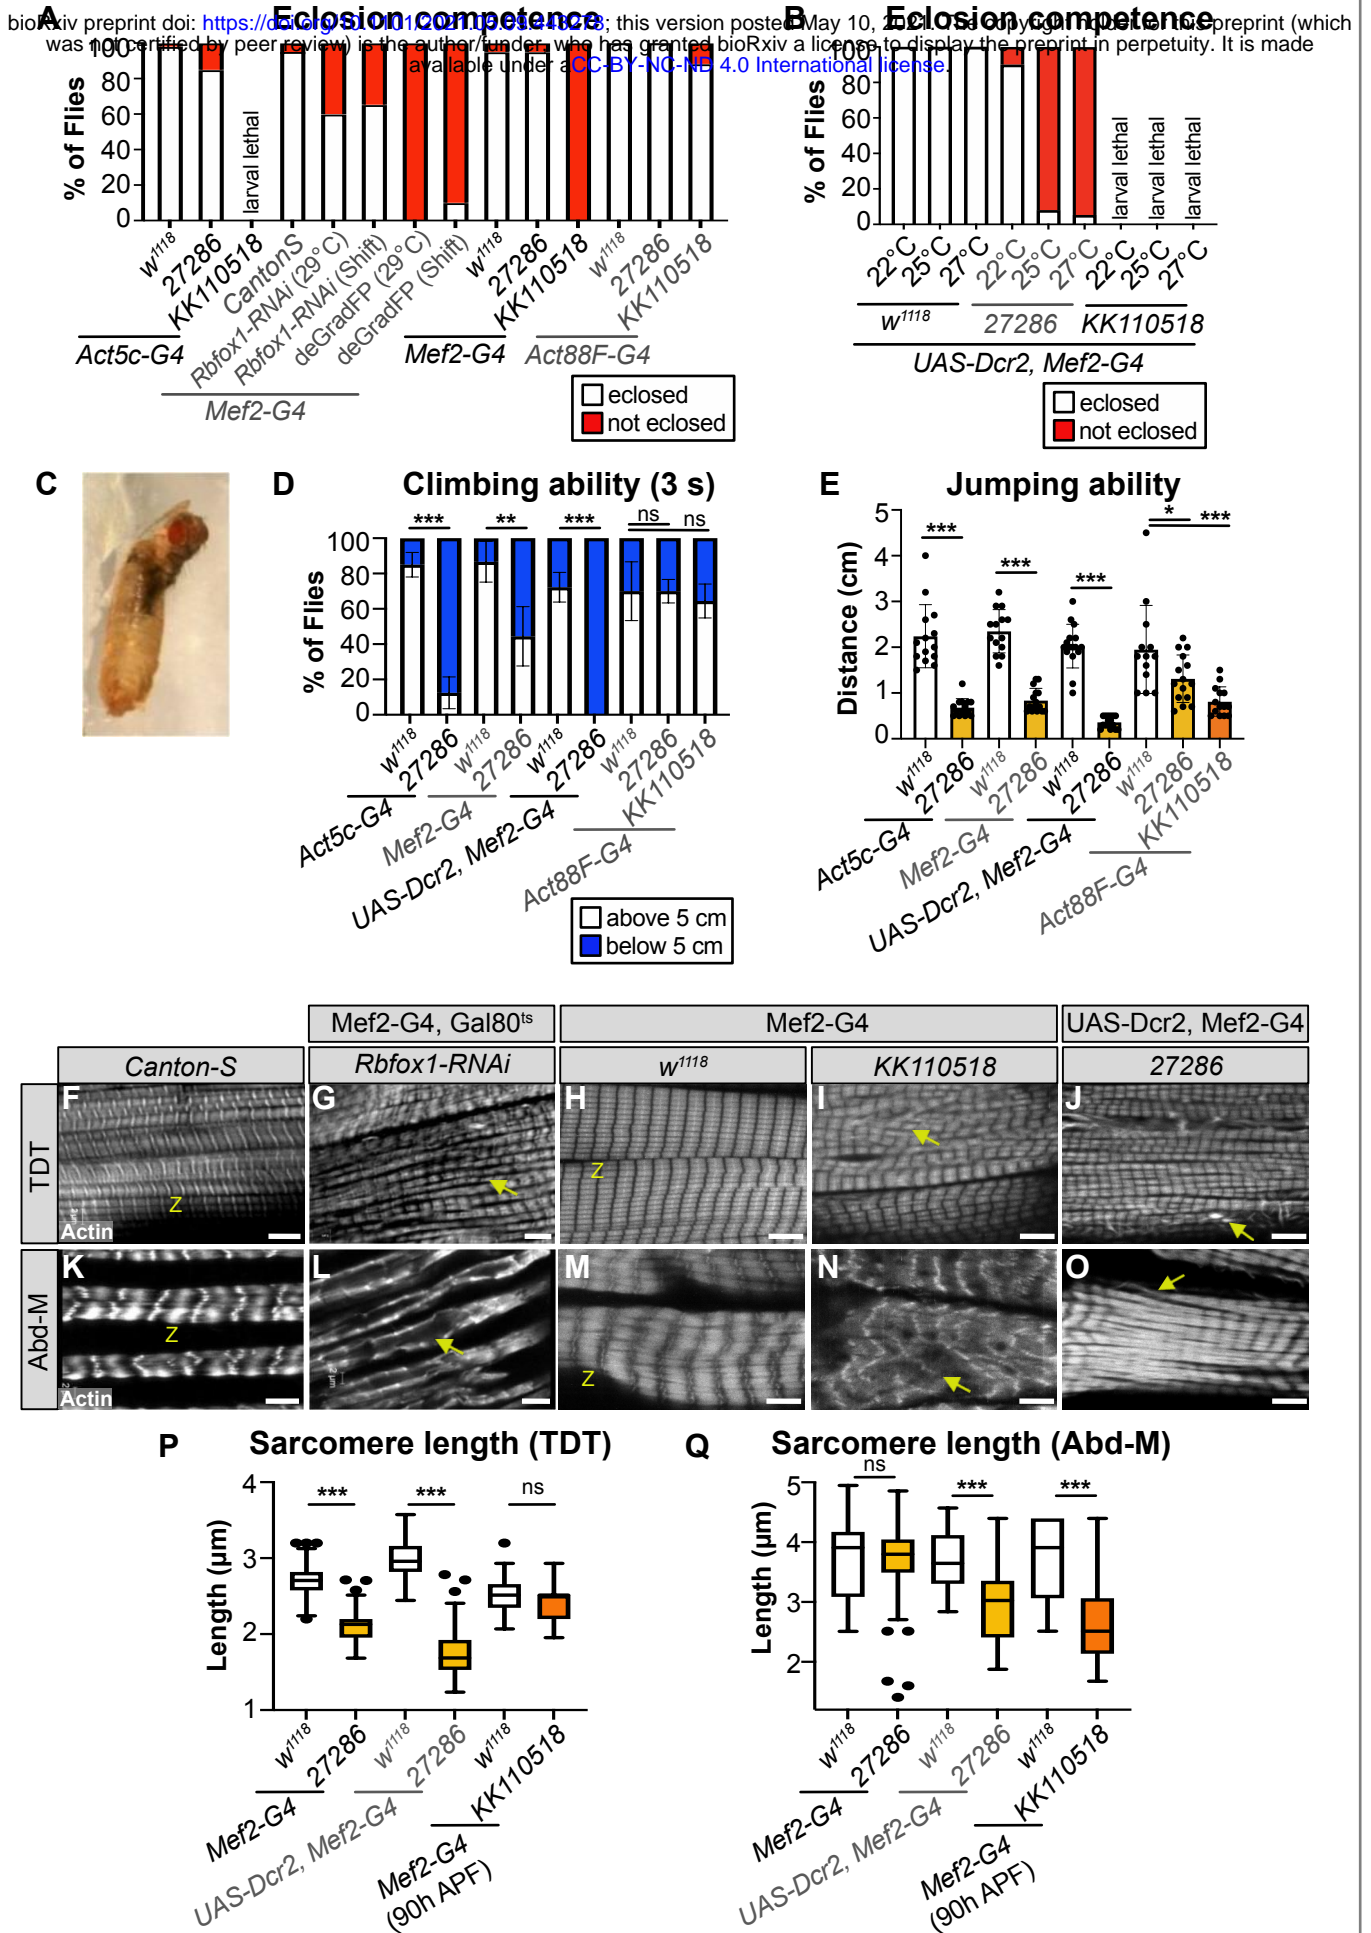

Figure 3

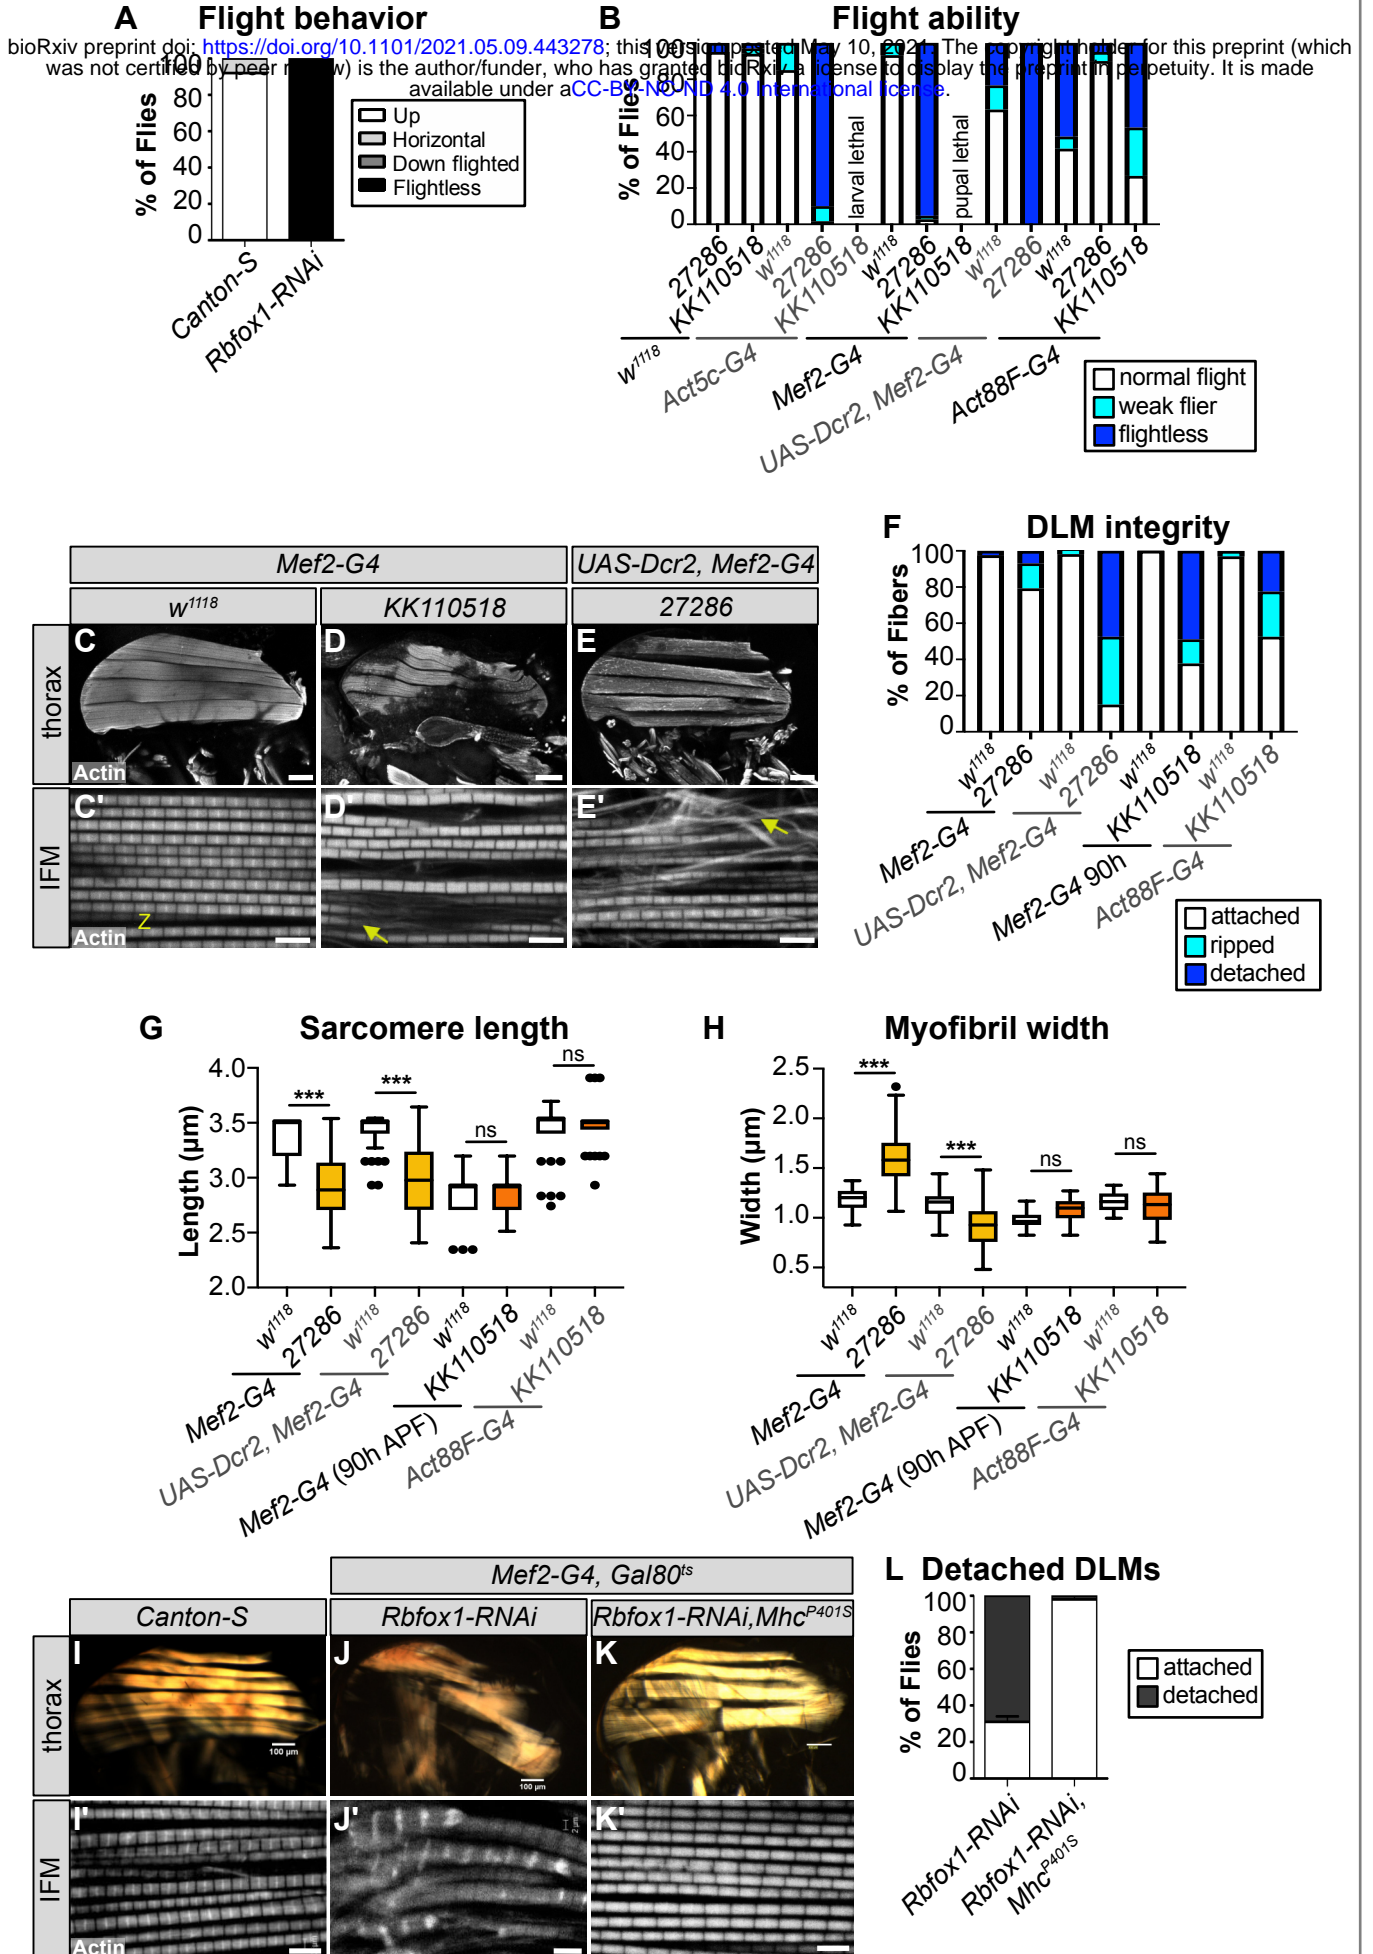

Figure 4

bioRxiv preprint doi: <https://doi.org/10.1101/2021.05.09.443278>; this version posted May 10, 2021. The copyright holder for this preprint (which was not certified by peer review) is the author/funder, who has granted bioRxiv a license to display the preprint in perpetuity. It is made available under aCC-BY-NC-ND 4.0 International license.

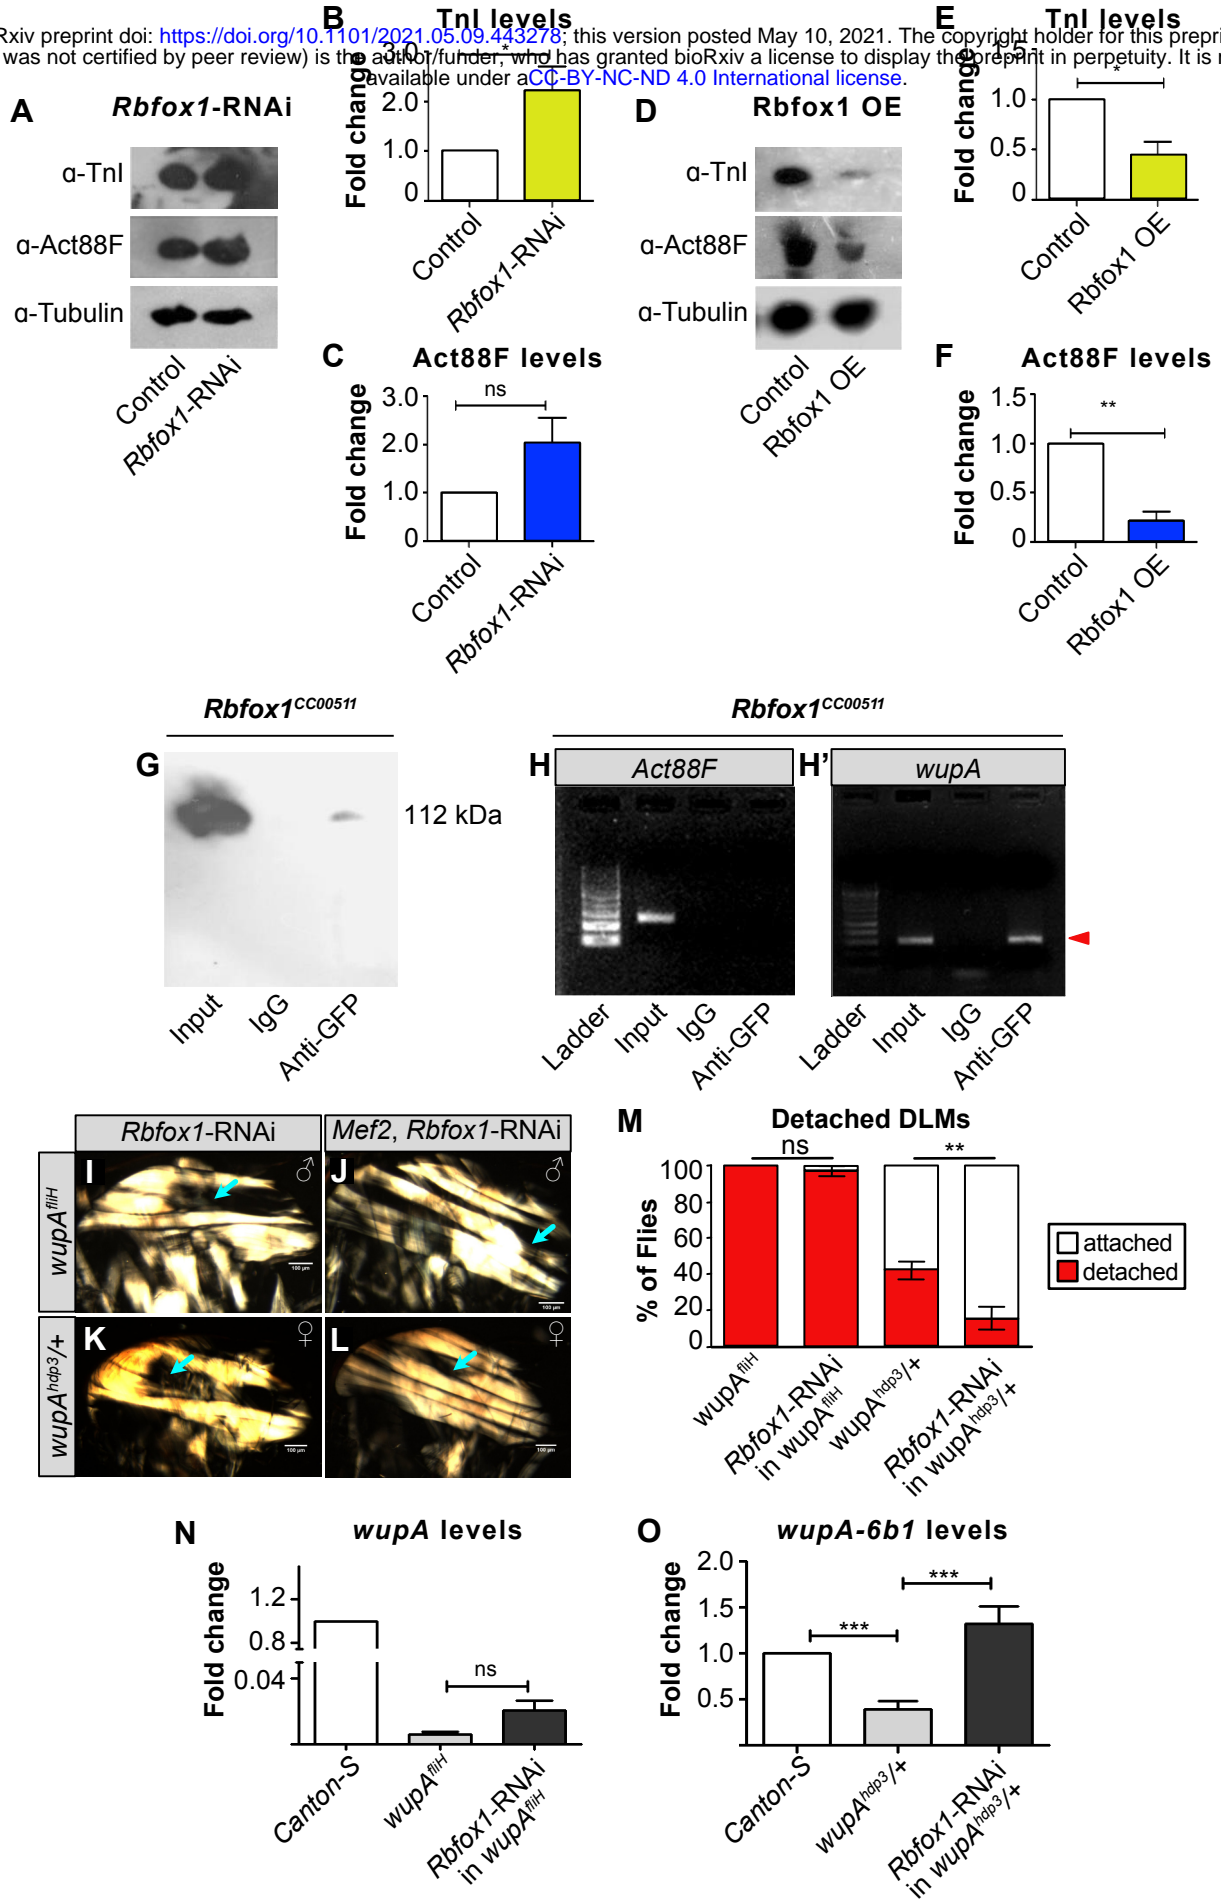



Figure 5

bioRxiv preprint doi: <https://doi.org/10.1101/2021.05.09.443278>; this version posted May 10, 2021. The copyright holder for this preprint (which was not certified by peer review) is the author/funder, who has granted bioRxiv a license to display the preprint in perpetuity. It is made available under a [CC-BY-NC-ND 4.0 International license](https://creativecommons.org/licenses/by-nc-nd/4.0/).

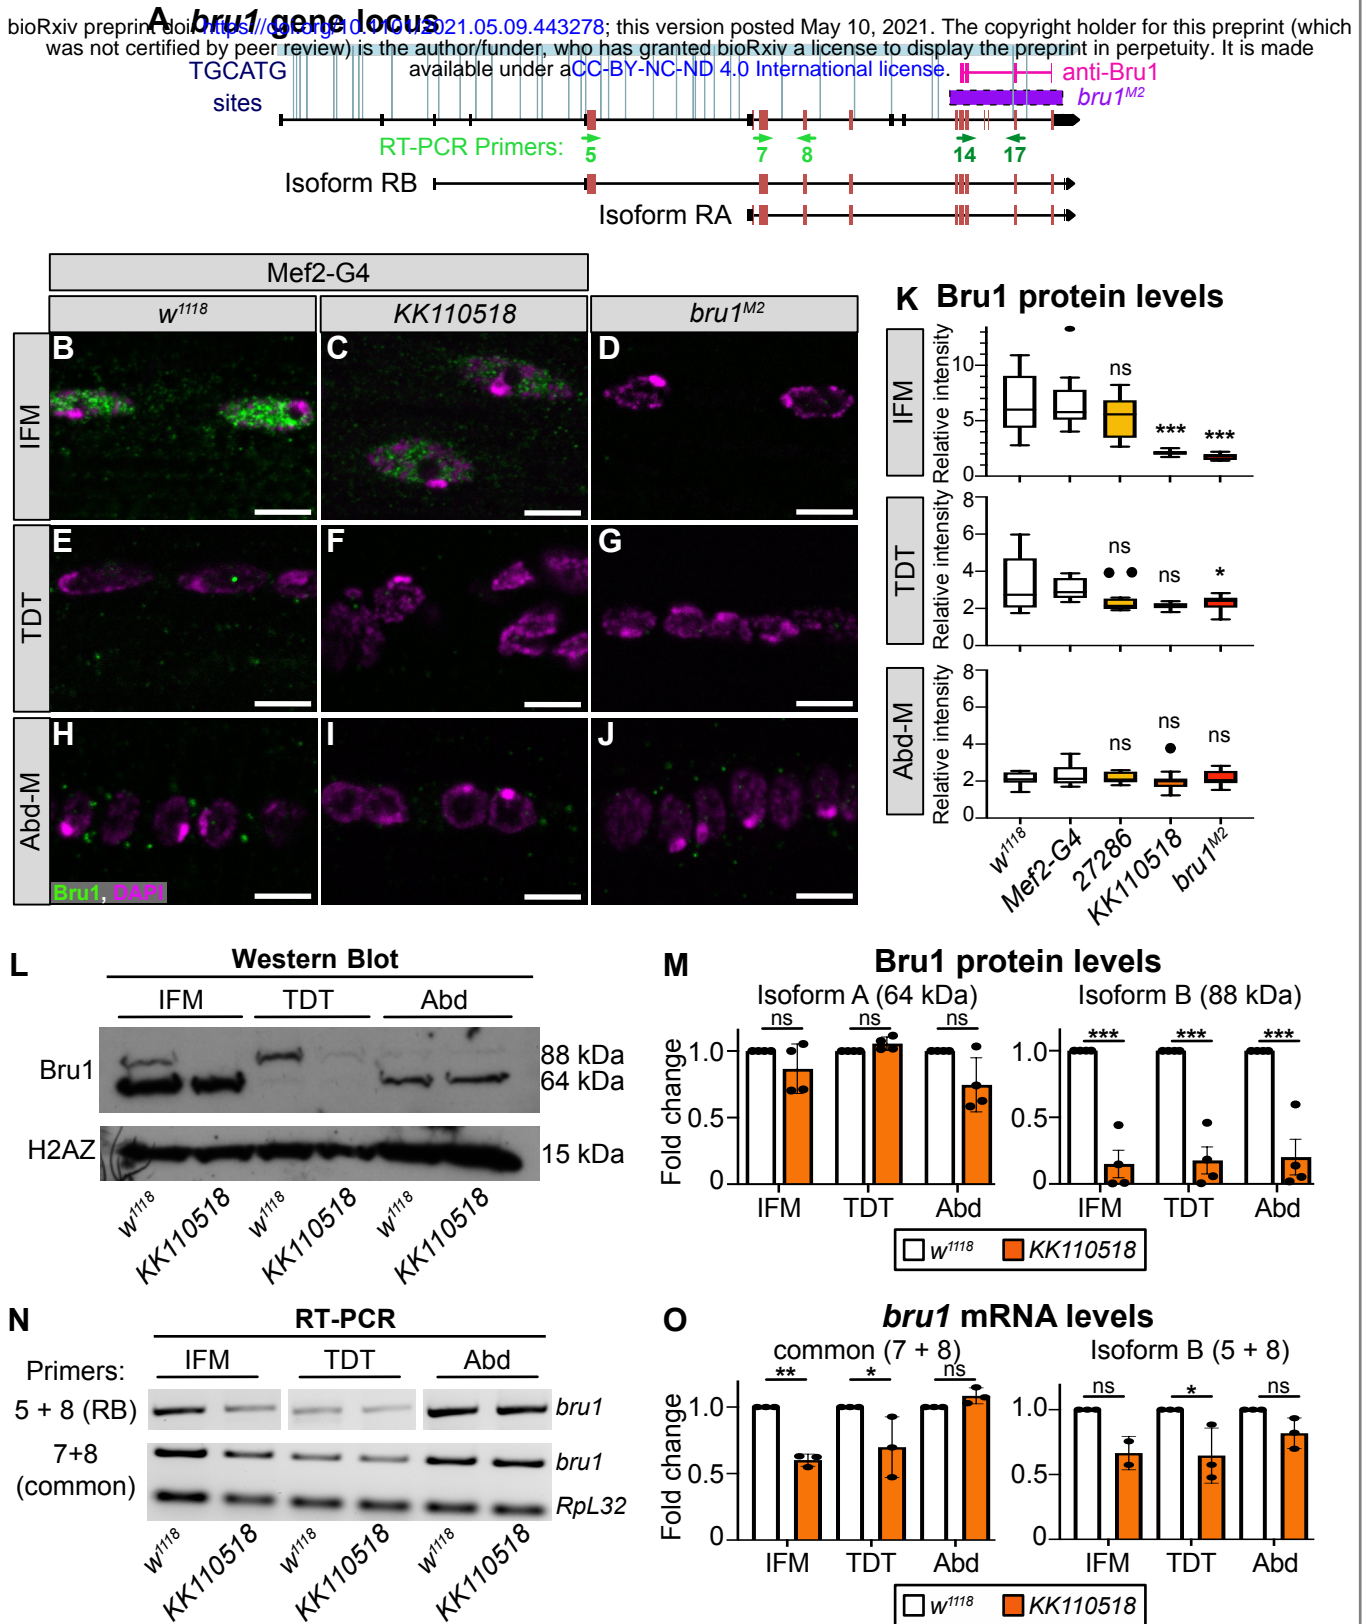

**Figure 6**

bioRxiv preprint doi: <https://doi.org/10.1101/2021.05.09.443278>; this version posted May 10, 2021. The copyright holder for this preprint (which was not certified by peer review) is the author/funder, who has granted bioRxiv a license to display the preprint in perpetuity. It is made available under aCC-BY-NC-ND 4.0 International license.

Mef2-G4

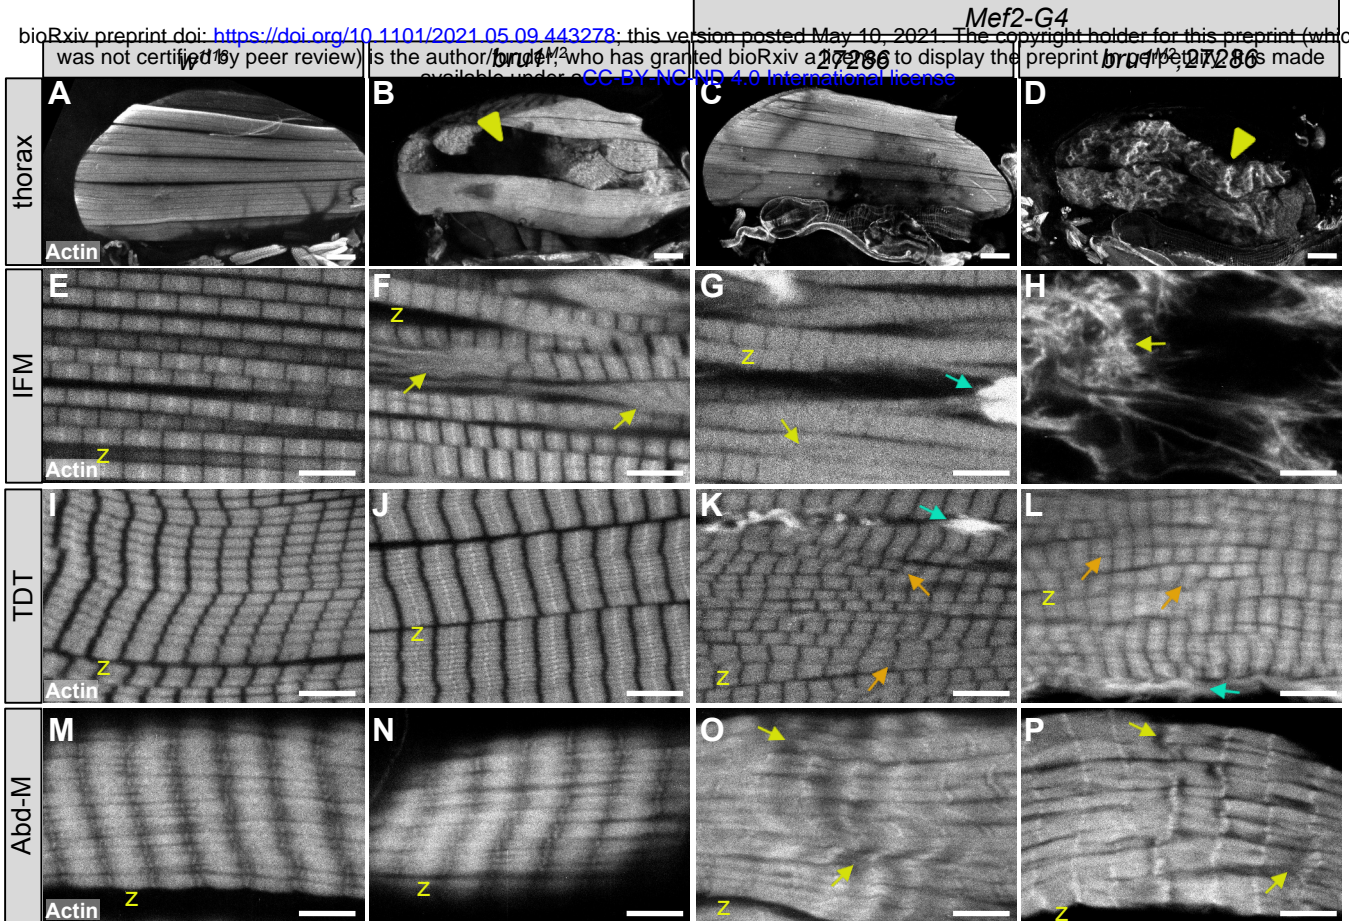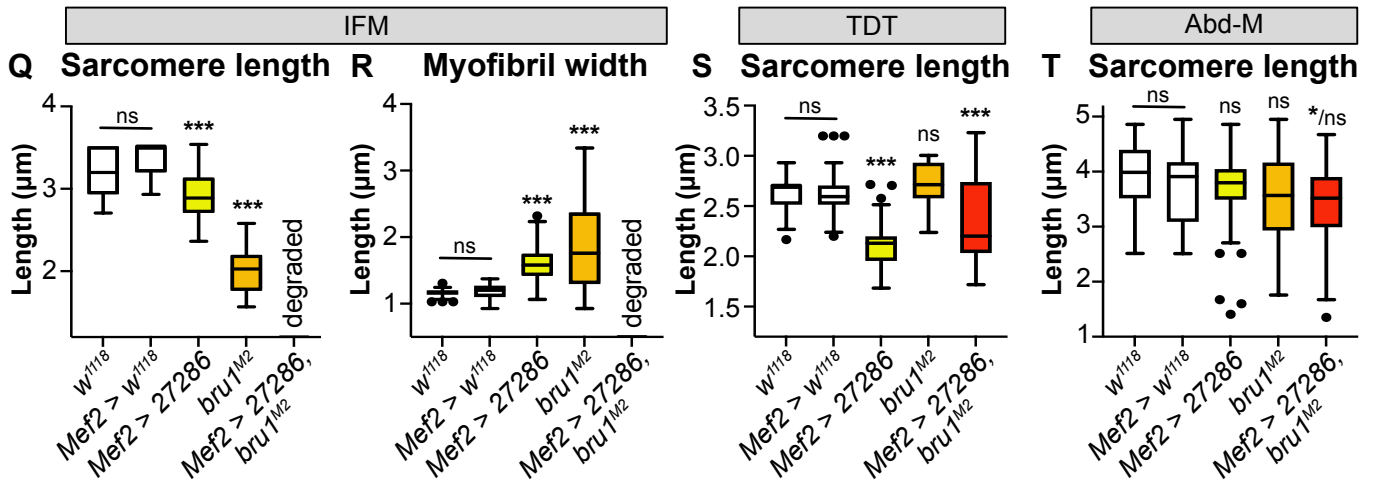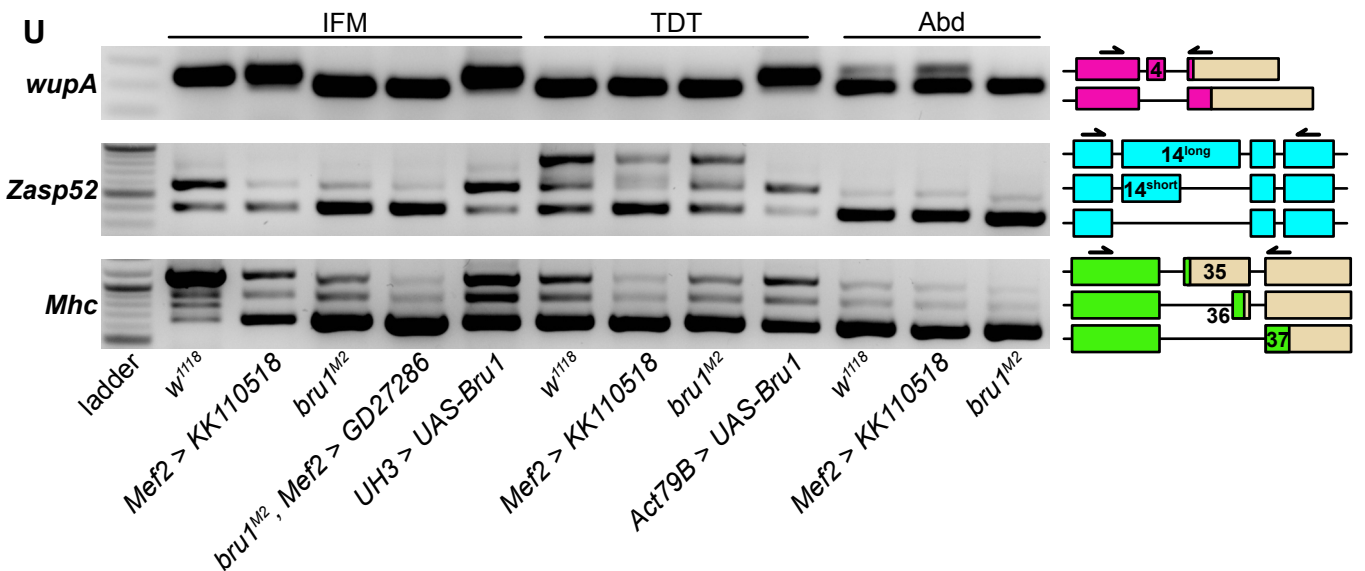

Figure 7

bioRxiv preprint doi: <https://doi.org/10.1101/2021.05.09.443278>; this version posted May 10, 2021. The copyright holder for this preprint (which was not certified by peer review) is the author/funder, who has granted bioRxiv a license to display the preprint in perpetuity. It is made available under aCC-BY-NC-ND 4.0 International license.

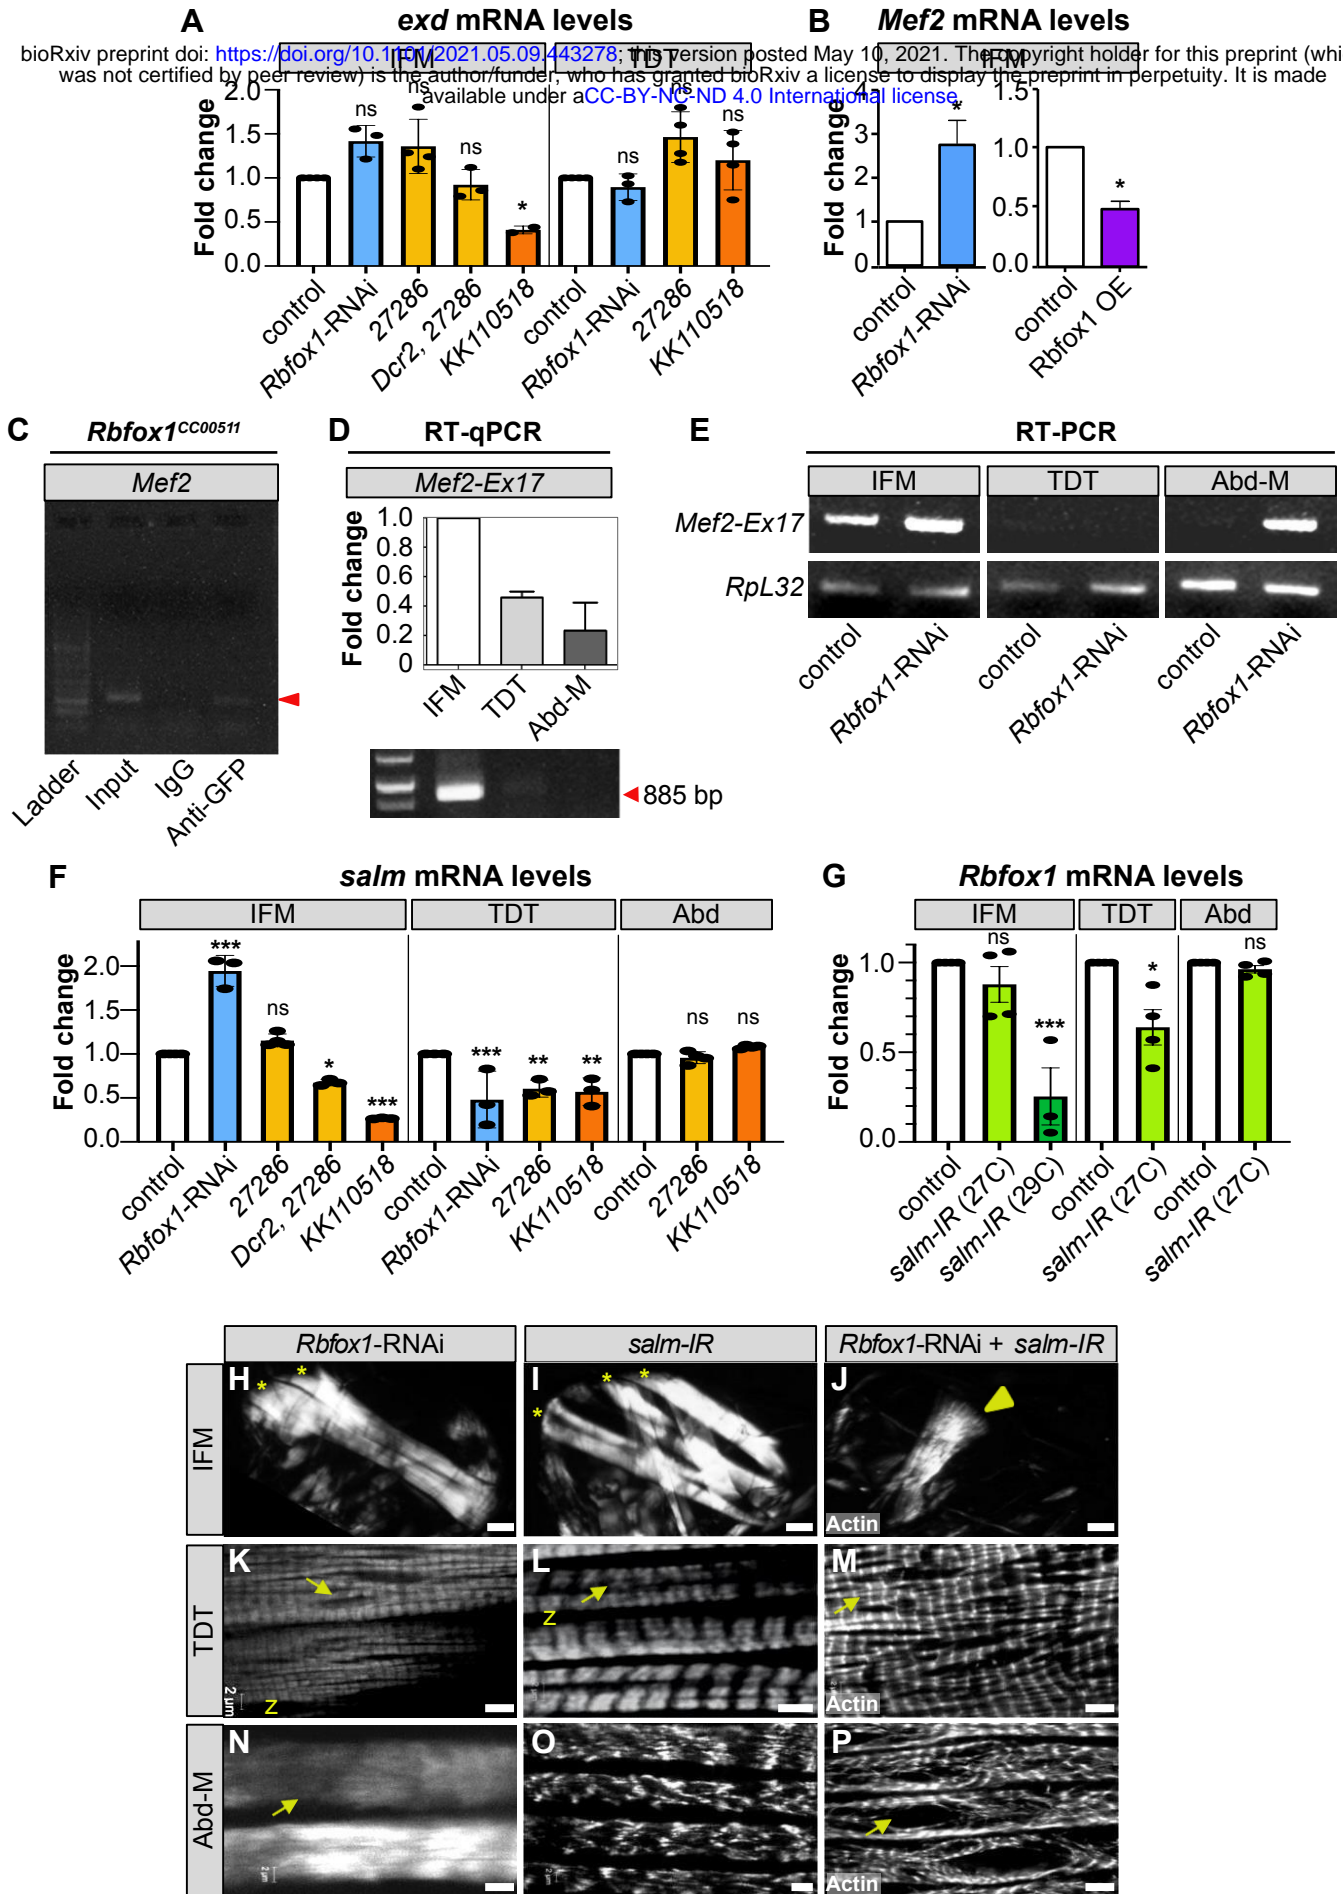

# A. Rbfox1 function in muscle development

bioRxiv preprint doi: <https://doi.org/10.1101/2021.05.09.443278>; this version posted May 10, 2021. The copyright holder for this preprint (which was not certified by peer review) is the author/funder, who has granted bioRxiv a license to display the preprint in perpetuity. It is made available under aCC-BY-NC-ND 4.0 International license.

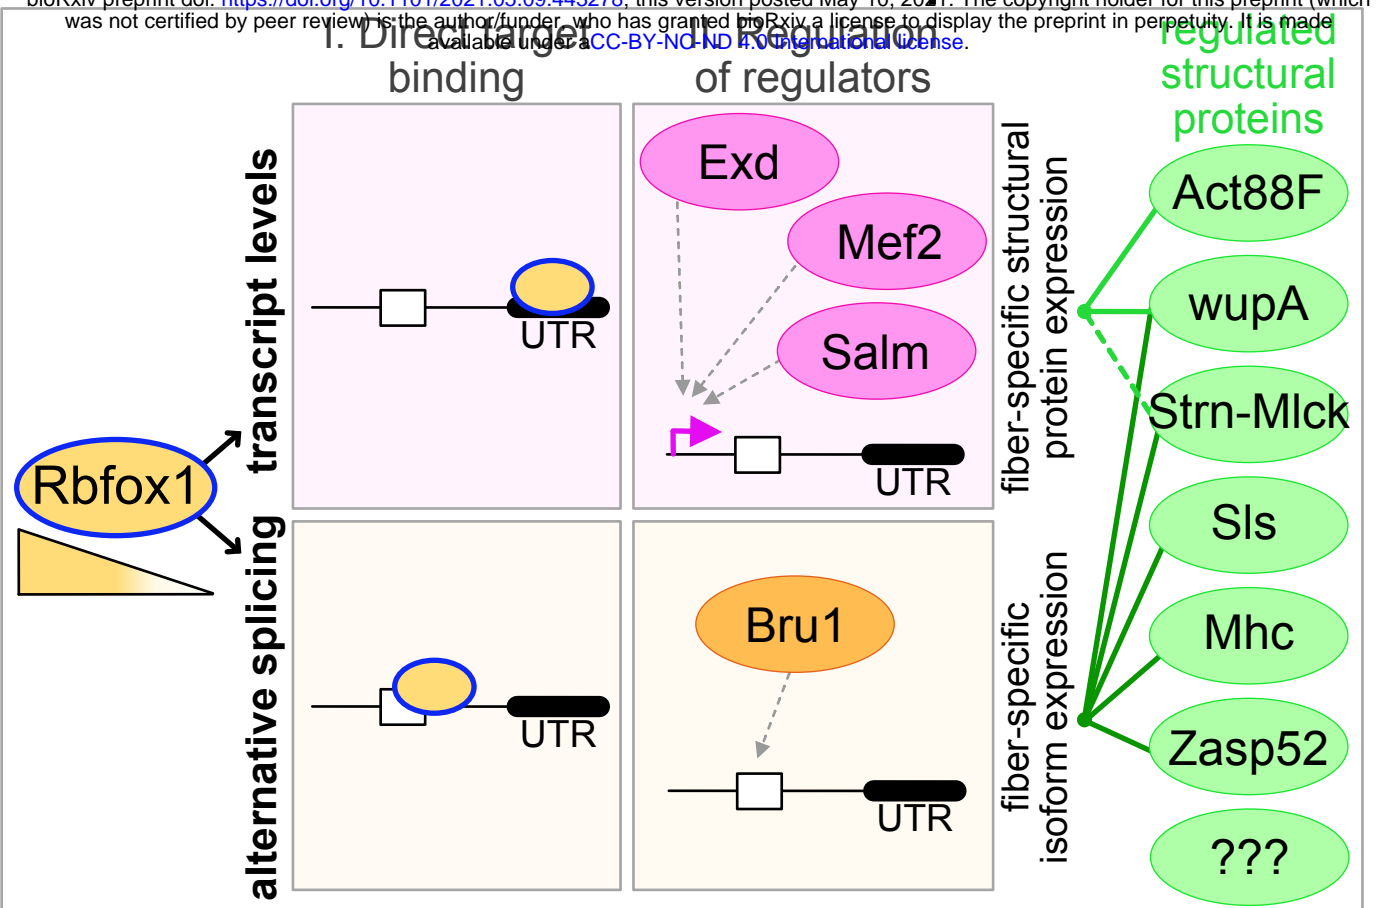

## B. Rbfox1 regulatory network

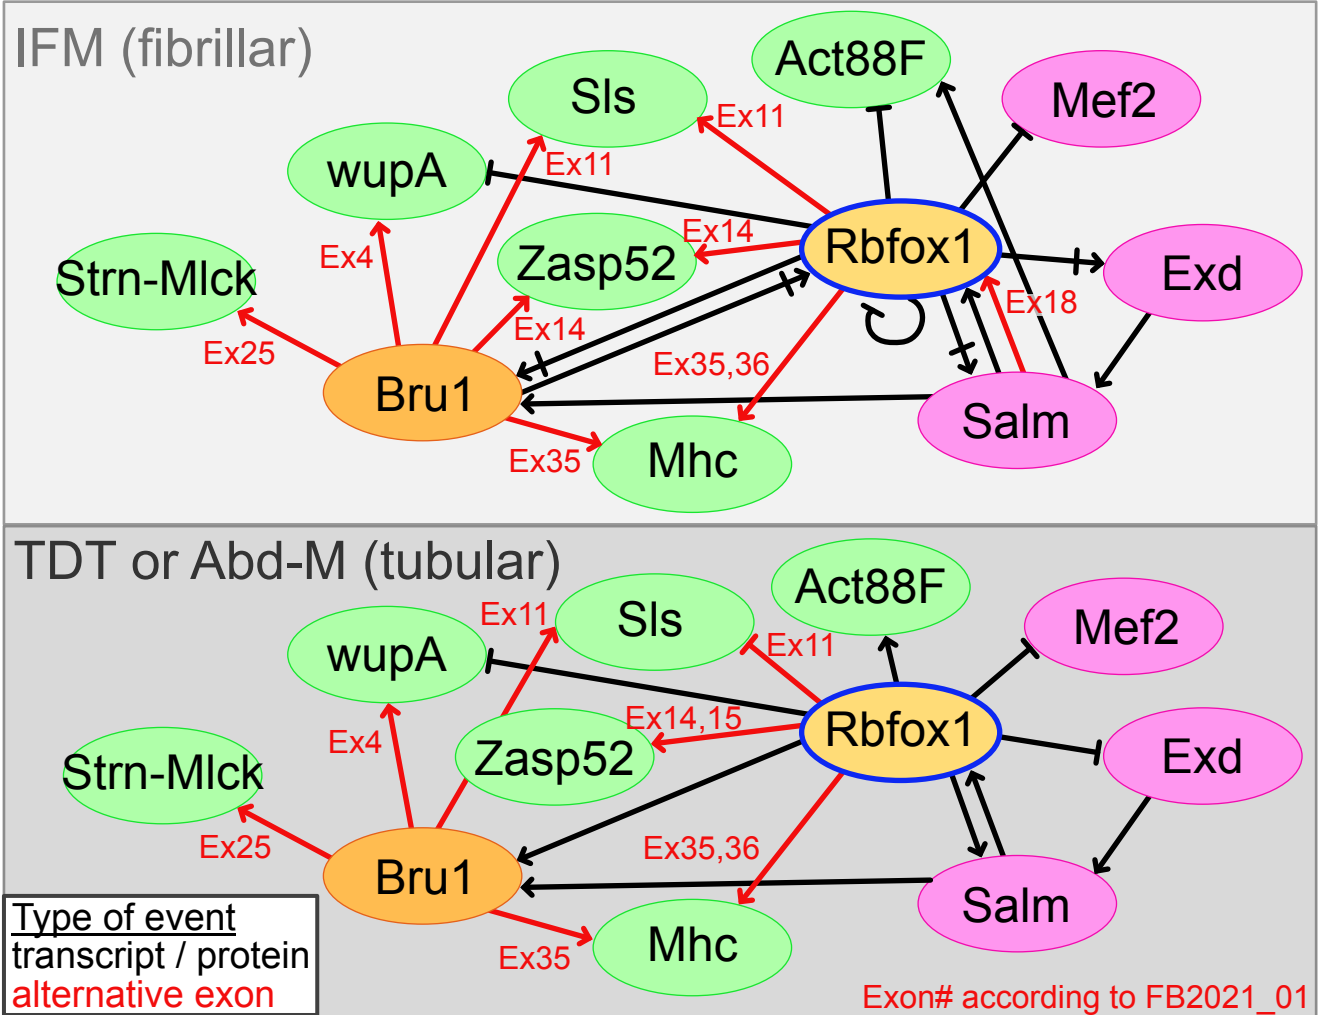

Source: http://biorxiv.org/content/10.1101/2021.05.09.443278v1.full.pdf
